# Supplementary material for: Single-Larva RNA Sequencing Identifies Markers of Copper Toxicity and Exposure in Early Mytilus californianus Larvae
Source: Front Physiol. 2021 Dec 9;12:647482. doi: 10.3389/fphys.2021.647482 (PMC8696127; doi:10.3389/fphys.2021.647482)
Supplement: Supplementary file 2 [file Table_2.XLSX]

## Sheet: Exposure_bbmap_OR_Table_logfc1.
Table S2--Markers of Exposure in both 3 and 6 ug/L copper for single larvae. Genes that were DE between all control and all copper exposed animals at each copper concentration were identified.
Transcript Annotation			Differential Expression between 0 and 3 ug/L copper		Differential Expression between 0 and 6 ug/L copper
Contig name	Blastx against Uniprot	Blastp against Uniprot	log2FoldChange	Adjusted p-value	log2FoldChange	Adjusted p-value
transcript-124_29852_75PE|m.41464	Serine/threonine-protein kinase NIM1;	Serine/threonine-protein kinase NIM1;	1.27504	0.0128433	-4.50399	4.37533e-52
transcript-124_50723_75PE|m.57373	.	.	1.22633	0.0176895	-3.62936	3.83528e-32
transcript-124_5197_LongLar8	.	.	1.31824	0.01325	-3.68367	4.51626e-32
transcript-124_7730_75PE|m.21911	Hemicentin-1;	Hemicentin-1 {ECO:0000312|MGI:MGI:2685047};	1.20603	0.0222813	-3.48401	5.91161e-30
transcript-124_78797_75PE	.	.	1.62603	0.00286806	-3.7828	7.56597e-30
transcript-124_68203_75PE	.	.	1.73184	0.000618409	-3.13744	3.24826e-24
Myt_cherry_idba_c5909	.	.	2.80749	5.20606e-08	-3.34859	3.84531e-22
transcript-124_37451_75PE|m.47393	Collagen type IV alpha-3-binding protein;	Collagen type IV alpha-3-binding protein;	1.29836	0.0241113	-3.32691	1.31859e-21
transcript-124_22131_75PE	.	.	1.58164	0.00230396	-2.99441	4.62845e-21
Myt_cherry_idba_rep_c4269|m.90615	39S ribosomal protein L37, mitochondrial;	39S ribosomal protein L37, mitochondrial;	1.9472	1.1464e-07	-2.54932	1.16983e-20
Contig2076	.	.	1.22697	0.0339525	-2.88654	4.03105e-16
R1_Contig2199|m.86367	Acidic mammalian chitinase;	Acidic mammalian chitinase;	1.30527	0.00406338	3.21902	1.28207e-15
R1_Contig5214	.	.	3.35546	2.49654e-11	3.37638	4.55618e-15
MinimusContig_1947|m.3867	Serine/threonine-protein kinase Nek11;	Serine/threonine-protein kinase Nek11;	1.73753	0.0216276	4.375	2.50302e-13
R1_Contig8529	.	.	1.51743	4.50471e-08	1.72243	4.051e-13
MinimusContig_3379|m.6789	Transmembrane protein 94 {ECO:0000312|HGNC:HGNC:28983};	Transmembrane protein 94 {ECO:0000312|HGNC:HGNC:28983};	1.34011	0.0199607	-2.6675	4.09334e-13
Myt_cherry_idba_rep_c14000	.	.	1.2044	0.0311773	-2.48496	8.8222e-13
transcript-124_93327_75PE	.	.	-5.50152	7.22429e-15	-4.45536	9.45613e-13
Contig185|m.10618	Protein numb;	Protein numb;	3.7453	1.0713e-07	4.31987	1.23756e-12
R1_Contig5867	.	.	1.47721	3.84906e-07	1.75498	1.54156e-12
Myt_cherry_idba_rep_c3420	.	.	1.51332	1.29275e-07	1.73114	1.73188e-12
transcript-124_19542_75PE	.	.	-4.22586	2.83184e-17	-3.13616	2.22381e-12
Contig2055	.	.	1.46573	2.47261e-05	2.01225	4.88166e-12
MinimusContig_2471|m.5002	Transient receptor potential cation channel subfamily M member 6;	Transient receptor potential cation channel subfamily M member 6;	4.41357	1.78112e-14	3.38291	5.34794e-12
R1_Contig151|m.84956	Sequestosome-1;	Sequestosome-1;	-3.18948	1.13585e-08	-3.29958	1.23663e-11
transcript-124_50130_75PE	.	.	-5.19826	3.99597e-12	-4.43653	2.38715e-11
MinimusContig_4188|m.8148	E3 ubiquitin-protein ligase UBR4;	E3 ubiquitin-protein ligase UBR4;	-1.57921	0.0447424	-3.87739	5.56063e-11
transcript-124_57780_75PE	.	.	-2.91781	2.67115e-05	-3.81802	1.34009e-10
R1_Contig8273	.	.	1.29758	0.00010479	1.79	1.55731e-10
transcript-124_54934_75PE	.	.	3.29531	6.8106e-09	3.10324	4.27143e-10
transcript-124_8364_75PE|m.22476	RILP-like protein 1;	RILP-like protein 1;	3.6394	1.35458e-07	3.6987	6.92299e-10
transcript-124_42409_75PE|m.51150	Apolipoprotein D;	Apolipoprotein D;	-4.56424	1.36237e-08	-4.38231	7.56775e-10
transcript-124_26384_75PE|m.38619	.	.	-3.42909	1.07888e-08	-3.26167	7.58259e-10
transcript-124_5205_75PE|m.19520	Nose resistant to fluoxetine protein 6;	Nose resistant to fluoxetine protein 6;	1.28448	0.076669	-2.93407	7.81812e-10
MinimusContig_2964	.	.	3.9407	4.77505e-11	3.09002	9.006e-10
MinimusContig_1900	.	.	1.73054	0.000149171	2.36132	9.5004e-10
transcript-124_48777_75PE	.	.	1.83173	0.0147722	3.73182	1.30468e-09
transcript-124_25955_75PE	.	.	2.96661	2.73903e-06	3.27906	2.25789e-09
MinimusContig_6227	.	.	-3.435	4.4841e-07	-3.57053	2.75593e-09
MinimusContig_2265|m.4577	.	.	-1.93943	0.0133289	-3.66742	3.08673e-09
MinimusContig_6172	.	.	4.12647	1.24071e-10	3.20979	3.36659e-09
transcript-124_12143_LongLar8	.	.	2.28331	1.86713e-05	2.70123	3.5176e-09
transcript-124_11590_75PE|m.25602	Galaxin {ECO:0000312|EMBL:ADI50283.1};	Galaxin {ECO:0000312|EMBL:ADI50283.1};	1.47771	0.00509992	-2.03195	4.02326e-09
Contig3301|m.13578	Signal recognition particle subunit SRP72;	Signal recognition particle subunit SRP72;	-3.02443	3.92156e-05	-3.70963	4.3319e-09
transcript-124_42302_75PE	.	.	3.48907	2.36965e-05	4.17299	4.34175e-09
transcript-124_54068_75PE	.	.	1.35534	5.81064e-05	1.67972	5.14356e-09
MinimusContig_6041|m.10176	Protein disulfide-isomerase A6 homolog {ECO:0000305};	Protein disulfide-isomerase A6;	4.55248	2.91568e-09	3.84397	5.62019e-09
transcript-124_3751_75PE	.	.	2.46332	1.65729e-06	2.5461	1.16461e-08
Myt_cherry_idba_rep_c4188	.	.	3.69197	1.33683e-09	3.05342	1.27167e-08
transcript-124_1534_75PE|m.15811	Sperm-associated antigen 1;	Sperm-associated antigen 1;	-2.76283	0.000131268	-3.49679	1.32965e-08
transcript-124_15097_75PE|m.28899	Sialin;	Sialin;	-1.69604	0.00793038	-2.86125	1.53739e-08
MinimusContig_207	.	.	2.25325	4.63062e-05	2.68117	1.53889e-08
Contig521|m.11061	RNA 3'-terminal phosphate cyclase-like protein;	RNA 3'-terminal phosphate cyclase-like protein;	1.22439	0.029739	-2.07895	1.61158e-08
transcript-124_66838_75PE|m.68590	.	.	-1.94987	0.0362484	-4.06032	1.66285e-08
transcript-124_7854_75PE|m.22018	SH3 domain-binding protein 2;	SH3 domain-binding protein 2;	1.80522	0.000992504	-2.17323	1.83598e-08
R1_Contig3259	.	.	3.56674	2.47326e-07	3.36073	2.00309e-08
transcript-124_1117_LongLar8	.	.	2.81224	0.000231279	3.60148	2.43183e-08
MinimusContig_4025	.	.	2.719	4.98373e-07	2.60476	2.61276e-08
R1_Contig3310|m.86922	Protein CREBRF homolog;	Protein CREBRF homolog;	-2.95398	0.000796655	-4.08889	2.96129e-08
MinimusContig_3561	.	.	1.63887	0.0212233	3.16862	3.94309e-08
Contig1886|m.12374	KappaPI-actitoxin-Avd3a {ECO:0000303|PubMed:22683676};	U-actitoxin-Avd3l {ECO:0000303|PubMed:22683676};	-2.97128	0.000828928	-4.09356	4.10675e-08
transcript-124_14883_75PE|m.28705	.	.	-2.66505	1.48156e-05	-2.96415	4.28382e-08
transcript-124_3133_LongLar8	.	.	3.53817	3.26137e-08	3.04409	5.18429e-08
transcript-124_1913_75PE	.	.	3.15006	9.44462e-11	2.28646	5.21724e-08
MinimusContig_2024	.	.	3.78327	7.53998e-09	3.14174	5.82537e-08
transcript-124_22609_75PE|m.35372	.	.	-1.65805	0.0247039	-3.13261	6.56742e-08
transcript-124_18583_75PE	.	.	2.4376	0.000110522	2.91274	7.16979e-08
transcript-124_27686_75PE	.	.	2.95046	2.62108e-06	2.93587	7.4684e-08
R1_Contig2146	.	.	1.44372	0.0792375	3.44633	7.67738e-08
R1_Contig8289	.	.	2.06518	0.00010479	2.45156	8.50353e-08
transcript-124_58542_75PE|m.62968	.	.	3.39378	0.000122488	4.03867	1.04937e-07
transcript-124_5266_75PE|m.19622	DBH-like monooxygenase protein 1 homolog;	DBH-like monooxygenase protein 1 homolog;	-1.50137	0.0173897	-2.66711	1.13276e-07
Contig823	.	.	1.92669	0.00174294	2.72004	1.15568e-07
R1_Contig7189|m.89016	.	.	-3.2919	5.18252e-06	-3.37059	1.26018e-07
Contig1804	.	.	2.35731	6.00987e-05	2.68617	1.36219e-07
transcript-124_364_LongLar8	.	.	1.54971	0.00104729	2.0548	2.18119e-07
transcript-124_26064_75PE	.	.	-1.95852	0.00134119	-2.65717	2.64895e-07
Myt_cherry_idba_rep_c3809|m.90467	Troponin T;	Troponin T;	-2.23954	0.00147008	-3.04522	2.80435e-07
transcript-124_35698_75PE	.	.	1.51027	0.0215195	2.79751	2.89557e-07
MinimusContig_292|m.624	Cold shock domain-containing protein E1;	Cold shock domain-containing protein E1;	-1.58422	0.0408049	-3.09647	3.10421e-07
R1_Contig5892|m.88055	Multiple epidermal growth factor-like domains protein 6;	Multiple epidermal growth factor-like domains protein 6;	1.30885	0.0245655	-2.00075	3.19005e-07
R1_Contig3850	.	.	1.3594	3.77975e-05	1.4584	3.63853e-07
R1_Contig539	.	.	3.03607	2.49939e-06	2.87737	3.72514e-07
transcript-124_59732_75PE	.	.	2.88214	4.75408e-06	2.77939	3.95738e-07
MinimusContig_3759|m.7451	HEAT repeat-containing protein 1;	HEAT repeat-containing protein 1;	5.06582	2.13546e-06	4.74659	3.96653e-07
Myt_cherry_idba_rep_c3749	.	.	2.86043	1.12419e-06	2.6087	4.6676e-07
transcript-124_7967_75PE	.	.	2.72734	6.1857e-07	2.40216	5.13056e-07
transcript-124_7336_75PE	.	.	3.40273	1.30369e-09	2.39132	5.3642e-07
Contig386	.	.	-1.54403	0.00739	-2.37029	5.59077e-07
transcript-124_57619_75PE|m.62339	.	.	-3.57669	5.96931e-07	-3.18279	7.46645e-07
transcript-124_34718_75PE	.	.	3.58316	7.66337e-06	3.46062	7.75071e-07
R1_Contig1871|m.86135	Serine/threonine-protein phosphatase 2A catalytic subunit beta isoform;	Serine/threonine-protein phosphatase 2A catalytic subunit beta isoform;	2.38194	0.00195812	3.233	7.80629e-07
MinimusContig_3109	Major vault protein;	.	3.01735	0.000642882	3.71978	7.97541e-07
transcript-124_234_75PE|m.14438	Tudor domain-containing protein 1;	.	4.05619	0.000788675	5.04321	8.50358e-07
MinimusContig_1509|m.2569	Multidrug resistance-associated protein 1;	Multidrug resistance-associated protein 1;	2.75796	2.20783e-08	2.09099	8.88984e-07
transcript-124_11885_75PE|m.25867	Zinc finger protein 271;	Zinc finger protein 271;	-1.20381	0.0702177	-2.45572	9.42099e-07
Myt_cherry_idba_rep_c4619	.	.	1.5083	0.0177823	-2.2915	9.60942e-07
transcript-124_19541_75PE	.	.	-3.00884	5.1717e-09	-2.28827	1.0765e-06
transcript-124_11198_LongLar8|m.14032	.	.	1.34453	0.0175619	2.21773	1.10414e-06
transcript-124_40539_75PE	.	.	1.51859	0.0481128	-2.68536	1.15865e-06
transcript-124_12986_75PE|m.26988	Translation initiation factor eIF-2B subunit delta;	Translation initiation factor eIF-2B subunit delta;	3.33796	5.92409e-07	2.81951	1.17022e-06
transcript-124_3324_75PE|m.17610	Tight junction protein ZO-1;	Tight junction protein ZO-1;	1.2168	0.0158983	-1.66614	1.20471e-06
MinimusContig_104|m.163	Girdin;	Glutamate-rich protein 3;	1.5573	0.00458583	2.20086	1.24768e-06
transcript-124_1131_75PE|m.15412	NACHT and WD repeat domain-containing protein 2;	NACHT and WD repeat domain-containing protein 2;	2.82382	2.1463e-07	2.30038	1.27614e-06
MinimusContig_2040|m.4073	Ankyrin repeat domain-containing protein 46;	Ankyrin repeat domain-containing protein 46;	2.30571	0.00626386	3.40785	1.38434e-06
transcript-124_25432_75PE|m.37822	Tetratricopeptide repeat protein 25;	Tetratricopeptide repeat protein 25;	-2.68557	0.00104369	-3.35106	1.48181e-06
MinimusContig_235|m.511	Cilia- and flagella-associated protein 43 {ECO:0000312|HGNC:HGNC:26684};	Cilia- and flagella-associated protein 43 {ECO:0000312|HGNC:HGNC:26684};	-1.37824	0.00591391	-1.99038	1.50711e-06
transcript-124_21173_75PE|m.34135	.	.	3.5059	2.49654e-11	2.27939	1.73044e-06
Myt_cherry_idba_rep_c4439|m.90687	.	.	2.95319	1.27791e-05	2.80384	1.92189e-06
MinimusContig_653	.	.	3.36395	6.1046e-10	2.2709	1.9978e-06
transcript-124_31204_75PE|m.42599	.	.	-2.43541	0.00373866	-3.32457	2.28835e-06
R1_Contig7088	.	.	1.48786	0.051196	2.81905	2.46273e-06
R1_Contig3805	.	.	-1.25945	0.075933	-2.56524	2.50434e-06
Contig2738|m.13082	Zinc finger protein Noc;	Zinc finger protein Noc;	3.17136	9.76181e-08	2.40865	2.57968e-06
transcript-124_4407_75PE|m.18797	Tyrosine-protein kinase BAZ1B;	Tyrosine-protein kinase BAZ1B;	1.92055	0.00120361	2.35697	2.66091e-06
transcript-124_62785_75PE|m.65949	.	.	-3.05971	6.1046e-10	-2.11951	2.753e-06
MinimusContig_2523	.	.	2.20888	3.88806e-07	1.78668	2.7961e-06
transcript-124_7559_75PE|m.21717	Enolase 4;	Enolase 4;	3.45425	2.25892e-05	3.32106	2.81137e-06
R1_Contig4846	.	.	1.78846	0.000467503	2.05631	2.83698e-06
transcript-124_13455_75PE	.	.	3.95608	9.08946e-10	2.63783	2.87174e-06
MinimusContig_2566|m.5212	RING finger protein 145;	RING finger protein 145;	1.30412	0.0284389	-1.91064	2.8903e-06
transcript-124_15386_75PE	.	.	2.82849	0.000358133	3.18246	3.02966e-06
R1_Contig6849	.	.	1.695	0.000599054	1.96577	3.0427e-06
Contig2999|m.13340	.	.	2.9763	5.11609e-05	2.97476	3.07407e-06
Contig2030	.	.	1.26041	0.0404894	2.26686	3.11967e-06
R1_Contig7260|m.89063	High mobility group protein 20A;	High mobility group protein 20A;	2.92353	8.10867e-05	2.99909	3.129e-06
transcript-124_25833_75PE|m.38139	Next to BRCA1 gene 1 protein;	Next to BRCA1 gene 1 protein;	-1.83638	0.0780497	-3.72785	3.15744e-06
transcript-124_3649_75PE|m.17968	.	.	1.90231	0.000185697	2.04751	3.1612e-06
MinimusContig_6162	.	.	1.84586	0.0039258	2.49036	3.19079e-06
R1_Contig7022	.	.	1.82119	0.000786032	2.14741	3.19079e-06
transcript-124_78976_75PE	.	.	4.28046	9.1158e-08	3.26983	3.27227e-06
MinimusContig_2693	.	.	1.51354	0.0129154	-2.06855	3.35763e-06
MinimusContig_2870|m.5869	Lipoxygenase homology domain-containing protein 1;	Lipoxygenase homology domain-containing protein 1;	2.82607	2.36944e-06	2.4128	3.49079e-06
MinimusContig_4085|m.7986	GTPase-activating protein and VPS9 domain-containing protein 1;	GTPase-activating protein and VPS9 domain-containing protein 1;	3.6157	1.93139e-07	2.8302	3.49217e-06
MinimusContig_1053|m.1716	RNA-binding protein PNO1;	RNA-binding protein PNO1;	3.67962	0.000361162	4.10759	3.5432e-06
transcript-124_19123_75PE|m.32494	.	Suprabasin;	-3.43679	0.000298144	-3.81459	3.80455e-06
R1_Contig5856|m.88020	Aconitate hydratase, mitochondrial;	Aconitate hydratase, mitochondrial;	1.58815	0.00099138	1.89938	3.82693e-06
MinimusContig_673	.	.	2.16767	2.7185e-06	1.89661	3.89369e-06
transcript-124_12014_75PE|m.26023	Transcription initiation factor TFIID subunit 1-like;	Transcription initiation factor TFIID subunit 1;	3.27878	9.82605e-08	2.46343	3.89369e-06
transcript-124_24689_75PE	.	.	2.01266	1.43118e-05	1.86731	4.04533e-06
transcript-124_8915_75PE	.	.	3.2374	5.23423e-10	2.02658	4.06993e-06
R1_Contig3544	.	.	1.86464	0.0100306	2.77177	4.39662e-06
transcript-124_54391_75PE|m.60040	.	.	-4.43176	1.16389e-09	-3.08073	4.98998e-06
transcript-124_42527_75PE	.	.	1.29887	0.0394343	-1.98006	5.0439e-06
MinimusContig_5379	.	.	1.66334	0.00171596	2.04121	5.4811e-06
R1_Contig6135	.	.	-1.67344	0.000828207	-1.95793	5.79484e-06
R1_Contig8333|m.89652	Nucleolar GTP-binding protein 2;	Nucleolar GTP-binding protein 2;	1.5155	0.0293197	2.60844	5.86212e-06
transcript-124_15014_75PE	.	.	-2.57806	4.40219e-06	-2.27932	5.87021e-06
Contig1715|m.12254	Profilin;	Profilin;	-2.20233	0.0113085	-3.23155	6.01225e-06
transcript-124_7936_75PE	.	.	3.44255	3.45015e-05	3.27284	6.01225e-06
R1_Contig6211	.	.	2.85826	8.88296e-06	2.55624	6.24201e-06
R1_Contig8436	.	.	1.40348	0.000565483	1.57155	6.4683e-06
transcript-124_6521_75PE	.	.	3.13296	3.84306e-10	2.02787	6.84139e-06
R1_Contig2687	.	.	2.23988	7.80109e-05	2.2249	6.95097e-06
Myt_cherry_idba_rep_c1056	.	.	1.64195	0.000283128	1.75405	6.97521e-06
R1_Contig7396|m.89162	26S proteasome regulatory subunit 10B;	26S proteasome regulatory subunit 10B;	-1.71921	0.0339525	-2.87812	7.05368e-06
transcript-124_513_75PE	.	.	1.44047	0.00684626	1.97063	7.76001e-06
transcript-124_1290_75PE	.	.	1.6151	0.00449694	2.14266	7.92542e-06
Contig2753	.	.	2.47976	1.61154e-07	1.87583	8.1192e-06
Myt_cherry_idba_rep_c5770|m.91130	Sperm surface protein Sp17;	Sperm surface protein Sp17;	-1.99627	0.0192808	-3.0739	8.21727e-06
R1_Contig5392|m.87811	.	.	2.75174	0.000150689	2.7967	8.23651e-06
transcript-124_1538_75PE|m.15812	Neuroglian;	Neuroglian;	3.72663	2.45567e-08	2.59913	8.35117e-06
Myt_cherry_idba_rep_c9056	.	.	2.63014	0.00458154	3.48522	8.52311e-06
transcript-124_4038_75PE|m.18376	Leucine-rich repeat and IQ domain-containing protein 3;	Leucine-rich repeat and IQ domain-containing protein 3;	2.96871	3.59535e-07	2.24887	8.53154e-06
MinimusContig_6178	.	.	-2.78706	7.07295e-05	-2.75167	9.38757e-06
Myt_cherry_idba_c10815	.	.	2.62988	0.000211552	2.70735	1.03936e-05
R1_Contig8596|m.89734	Polyubiquitin-B;	Polyubiquitin-B;	1.43381	0.0315994	2.35226	1.0581e-05
transcript-124_7199_75PE|m.21445	Merlin;	Merlin;	-3.24471	3.48003e-05	-3.08111	1.07419e-05
MinimusContig_460|m.986	Zinc finger protein 226;	Zinc finger protein 226;	1.95247	0.0153075	2.94801	1.0953e-05
MinimusContig_5810|m.9964	.	.	4.15088	1.58347e-07	3.0473	1.0953e-05
R3_Contig38|m.84510	Protein SET;	Protein SET;	-3.45676	1.14742e-05	-3.10114	1.13565e-05
Myt_cherry_idba_rep_c264	.	.	1.89926	0.000608049	2.08236	1.17307e-05
R1_Contig1547	.	.	2.9638	3.65714e-07	2.26534	1.19161e-05
transcript-124_27519_75PE	.	.	3.61438	1.70719e-07	2.64539	1.36496e-05
transcript-124_28329_75PE	.	.	2.92324	0.000238231	2.98922	1.38253e-05
transcript-124_5918_75PE|m.20261	Transcriptional adapter 2-beta;	Transcriptional adapter 2-beta;	2.60882	0.000111692	2.54465	1.38501e-05
R1_Contig4085	.	.	3.76574	9.70834e-12	2.10711	1.3996e-05
transcript-124_25140_75PE	.	.	1.62337	0.0132306	2.37418	1.48458e-05
Contig220|m.10670	Uncharacterized protein C9orf172;	Uncharacterized protein C9orf172;	1.32884	0.00573993	1.75089	1.48499e-05
transcript-124_3548_75PE	.	.	2.7301	1.70264e-06	2.2149	1.50076e-05
transcript-124_32393_75PE	.	.	1.74548	0.0209208	2.66028	1.55813e-05
Contig2862|m.13236	Selenoprotein S;	Selenoprotein S;	-2.91098	0.000365391	-3.05504	1.68591e-05
MinimusContig_4979	.	.	2.43772	2.48345e-05	2.16001	1.70012e-05
Myt_cherry_idba_rep_c4132|m.90561	Condensin complex subunit 2;	Condensin complex subunit 2;	4.32833	5.8448e-06	3.60847	1.70277e-05
R2_Contig36	.	.	1.73101	0.00462633	2.21798	1.71501e-05
transcript-124_26709_75PE|m.38870	.	.	2.60348	0.000334965	2.68828	1.72984e-05
R1_Contig3272	.	.	2.1975	3.6653e-06	1.76946	1.81233e-05
R1_Contig8325|m.89648	WD repeat-containing protein 74;	WD repeat-containing protein 74;	3.21171	0.00120368	3.62596	1.83067e-05
MinimusContig_165	.	.	3.07576	7.48655e-11	1.81893	1.84229e-05
Contig3525|m.13757	Serine/threonine-protein kinase PAK 3;	Serine/threonine-protein kinase PAK 1;	-2.06944	0.0301912	-3.29009	1.84891e-05
transcript-124_5943_75PE	.	.	3.01187	5.11609e-05	2.76634	1.86529e-05
transcript-124_29840_75PE|m.41461	Periostin;	Periostin;	-2.59055	0.00605638	-3.37775	1.97124e-05
MinimusContig_809|m.1489	Unconventional myosin-XV;	Unconventional myosin-XV;	3.50785	6.50088e-07	2.64105	2.05863e-05
transcript-124_60487_75PE	.	.	2.44577	0.0098583	3.32751	2.23732e-05
transcript-124_31427_75PE	.	.	3.14318	4.44499e-05	2.83806	2.32048e-05
MinimusContig_6032|m.10170	.	Phospholipid transfer protein C2CD2L {ECO:0000305};	1.33013	0.0771012	-2.22614	2.33084e-05
transcript-124_69223_75PE|m.70084	.	.	-1.8294	0.0107588	-2.49683	2.5652e-05
R1_Contig5080	.	.	2.86874	1.09301e-05	2.38818	2.581e-05
R1_Contig1900	.	.	3.18475	0.000852636	3.43483	2.76929e-05
transcript-124_637_75PE|m.14895	Putative serine/threonine-protein kinase C05D10.2;	Putative serine/threonine-protein kinase C05D10.2;	3.63531	1.38297e-10	2.10983	2.80401e-05
transcript-124_6410_75PE|m.20663	Tudor domain-containing protein 3;	Tudor domain-containing protein 3;	1.75536	0.0175997	-2.37934	2.84955e-05
MinimusContig_1497	.	.	1.61226	0.00132948	1.79802	2.88184e-05
R1_Contig277	.	.	3.09853	0.000766542	3.30242	2.88184e-05
transcript-124_49702_75PE|m.56627	.	.	-3.38578	0.000105413	-3.25179	2.89834e-05
Contig2711	.	.	1.56835	0.000497524	1.62399	2.90201e-05
MinimusContig_102|m.159	CREB-binding protein;	CREB-binding protein;	2.72813	1.11672e-07	1.94833	2.96379e-05
MinimusContig_1333	.	.	1.4293	0.050108	2.41492	2.99268e-05
Contig3252|m.13543	.	.	-1.40498	0.0717445	-2.53725	3.03536e-05
transcript-124_70276_75PE	.	.	2.85143	0.000147505	2.73524	3.04597e-05
Myt_cherry_idba_rep_c9122|m.92167	Mitochondrial ribonuclease P protein 1 homolog;	Mitochondrial ribonuclease P protein 1 homolog;	2.89709	3.92156e-05	2.55246	3.14918e-05
R1_Contig4742	.	.	3.50812	0.000572755	3.63628	3.15818e-05
transcript-124_70812_75PE	.	.	3.77045	9.92312e-07	2.79906	3.3001e-05
R1_Contig3141	.	.	3.26158	8.0419e-10	2.00029	3.41552e-05
transcript-124_13608_75PE	.	.	3.29037	4.76137e-06	2.63709	3.53595e-05
transcript-124_27951_75PE	.	.	-1.89949	0.00427978	-2.33036	3.55016e-05
Contig2832|m.13201	Peptidyl-prolyl cis-trans isomerase G;	NK-tumor recognition protein;	2.38252	0.000148193	2.27449	3.55685e-05
MinimusContig_1880	.	.	1.57948	0.00174595	-1.67571	3.73708e-05
transcript-124_22535_75PE	.	.	3.75637	1.45509e-11	2.08232	3.73708e-05
transcript-124_1684_75PE|m.15911	BTB/POZ domain-containing protein 9;	BTB/POZ domain-containing protein 9;	2.59386	0.000606968	2.67832	3.75873e-05
Myt_cherry_idba_rep_c5299|m.90960	Immediate early response gene 5 protein;	Immediate early response gene 5 protein;	2.43941	1.40463e-05	2.00947	3.77316e-05
R2_Contig462	Ubiquitin-60S ribosomal protein L40;	.	1.70272	0.0156377	2.3797	3.91057e-05
MinimusContig_375	.	.	3.45235	2.64578e-09	2.08927	3.92198e-05
transcript-124_54797_75PE	.	.	-2.92458	8.05129e-09	-1.92459	3.94056e-05
transcript-124_41025_75PE	.	.	4.03114	7.75613e-10	2.3599	4.20851e-05
transcript-124_14125_75PE	.	.	3.06079	5.14821e-06	2.39568	4.22276e-05
transcript-124_17904_75PE|m.31460	.	.	4.58043	3.38898e-06	3.56222	4.23738e-05
R1_Contig7231|m.89046	26S proteasome non-ATPase regulatory subunit 12;	26S proteasome non-ATPase regulatory subunit 12;	-2.15885	0.0153075	-3.00525	4.24193e-05
Contig406|m.10925	Dynein intermediate chain 2, ciliary;	Dynein intermediate chain 2, ciliary;	1.20569	0.0749647	2.18662	4.30607e-05
MinimusContig_1842|m.3658	Cytokine-dependent hematopoietic cell linker;	.	-3.43322	4.61767e-05	-3.08669	4.45553e-05
MinimusContig_56	.	.	2.13868	0.00084253	2.24819	4.45553e-05
R1_Contig1781|m.86069	Putative ATP synthase subunit f, mitochondrial;	Putative ATP synthase subunit f, mitochondrial;	-1.9386	0.00701305	-2.45671	4.51043e-05
transcript-124_15469_75PE|m.29199	.	.	4.10881	2.49527e-07	2.90251	4.5437e-05
MinimusContig_4747	.	.	2.94724	1.99718e-06	2.25356	4.88386e-05
Myt_cherry_idba_rep_c3159	.	.	3.44806	2.03316e-06	2.57812	5.12452e-05
transcript-124_13838_75PE|m.27843	.	.	2.86868	0.00370977	3.38791	5.23913e-05
transcript-124_48959_75PE	.	.	2.64021	0.00340801	3.08832	5.29872e-05
transcript-124_21943_75PE	.	.	3.76563	6.8106e-09	2.30288	5.3016e-05
transcript-124_11702_75PE|m.25710	Partner of Y14 and mago {ECO:0000250|UniProtKB:P82804};	Partner of Y14 and mago {ECO:0000250|UniProtKB:P82804};	2.89084	0.000334965	2.81251	5.42889e-05
transcript-124_23228_75PE	.	.	-1.65354	0.0835634	-2.98578	5.57301e-05
MinimusContig_744	.	.	1.58186	0.000454728	1.56988	5.7266e-05
Contig2362|m.12752	Chelonianin;	KappaPI-actitoxin-Ael3a {ECO:0000303|PubMed:22683676};	3.08658	7.86899e-08	2.07955	5.79867e-05
transcript-124_64798_75PE|m.67316	Histone H3;	Histone H3;	2.09723	0.00191035	2.32244	5.81444e-05
Contig466|m.11004	ATP-binding cassette sub-family F member 2;	ATP-binding cassette sub-family F member 2;	-1.9897	0.00937658	-2.56781	5.82796e-05
Contig1286|m.11875	PDZ domain-containing protein GIPC1;	PDZ domain-containing protein GIPC1;	4.15277	5.97644e-07	2.93823	5.92807e-05
R1_Contig8012	.	.	3.76124	0.00508218	4.51925	6.16688e-05
transcript-124_42361_75PE|m.51119	YTH domain-containing protein 2;	YTH domain-containing protein 2;	1.29453	0.0426569	-1.79217	6.23354e-05
transcript-124_12829_75PE	.	.	2.86696	1.41484e-06	2.0631	6.38226e-05
Contig1831	.	.	-3.89415	5.35843e-06	-3.11506	6.41406e-05
transcript-124_2862_75PE	.	.	1.48643	0.00758393	1.86028	6.75728e-05
R1_Contig8409	.	.	1.74532	0.000499341	1.72751	7.12723e-05
R1_Contig3766	.	.	2.56791	1.60687e-06	1.91341	7.2047e-05
transcript-124_12687_75PE	.	.	-1.35095	0.0711008	2.4039	7.24634e-05
MinimusContig_1425|m.2330	Calpain-5;	Calpain-5;	2.7414	3.10913e-05	2.28664	7.47047e-05
Contig145|m.10558	Dynein beta chain, ciliary;	Dynein beta chain, ciliary;	1.23386	0.00657662	1.5071	7.58826e-05
Contig2536	.	.	2.61265	4.37176e-05	2.24345	7.70934e-05
transcript-124_489_75PE|m.14682	Double C2-like domain-containing protein beta;	Rabphilin-3A;	2.55657	0.00174595	2.76573	7.74563e-05
transcript-124_1160_75PE|m.15466	Probable helicase senataxin {ECO:0000305};	Probable helicase senataxin {ECO:0000305};	-1.48905	0.0981947	-2.74931	7.76125e-05
Contig3229|m.13526	26S proteasome non-ATPase regulatory subunit 14;	26S proteasome non-ATPase regulatory subunit 14;	2.87209	0.000425151	2.78389	7.80831e-05
transcript-124_1833_75PE|m.16069	Collagen alpha-4(VI) chain;	Collagen alpha-4(VI) chain;	1.2419	0.0154452	-1.47922	7.83148e-05
transcript-124_5023_75PE	.	.	2.22029	0.000333416	2.11797	8.15247e-05
transcript-124_42896_75PE	.	.	3.46426	6.47846e-05	2.98188	8.21936e-05
transcript-124_38435_75PE	.	.	1.29315	0.0787209	-2.04055	8.23172e-05
Contig1701	.	.	1.78503	0.00265676	1.99114	8.28561e-05
transcript-124_29067_75PE|m.40846	.	.	1.9058	0.00131108	2.00665	8.28561e-05
transcript-124_8591_75PE|m.22720	F-box/WD repeat-containing protein 8;	F-box/WD repeat-containing protein 8;	1.20318	0.0515171	-1.69289	8.3432e-05
Contig2951|m.13294	.	.	-3.33314	3.67627e-05	-2.87358	8.41217e-05
transcript-124_32311_75PE	.	.	3.67523	8.05129e-09	2.2472	8.45212e-05
Contig2946	.	.	3.0012	3.84085e-05	2.49606	8.6404e-05
R1_Contig7113	.	.	2.25737	0.000280166	2.10536	8.79278e-05
MinimusContig_134|m.286	Coiled-coil domain-containing protein 180;	Coiled-coil domain-containing protein 180;	2.68725	4.58589e-06	2.00968	8.81797e-05
MinimusContig_1590	.	.	1.55985	0.0012631	1.62922	8.95689e-05
R1_Contig3665	.	.	1.50716	0.0131072	1.96945	9.08008e-05
Contig1262	.	.	1.9924	0.00140582	2.09526	9.30779e-05
MinimusContig_3677	.	.	1.53021	0.0322333	2.25853	9.34228e-05
transcript-124_119_75PE	.	.	3.31248	8.05129e-09	2.06269	9.34228e-05
transcript-124_25940_75PE	.	.	2.87011	3.94952e-06	2.11656	9.35728e-05
transcript-124_4991_75PE|m.19374	DNA topoisomerase 1;	DNA topoisomerase 1;	1.53375	0.0105479	1.94819	9.35728e-05
MinimusContig_1112	.	.	2.71915	5.07124e-07	1.9071	9.81636e-05
transcript-124_52333_75PE	.	.	4.13558	0.000153759	3.7097	0.00010108
R1_Contig5207	.	.	1.74517	0.0111319	2.2262	0.000101612
transcript-124_14810_75PE	.	.	3.74509	2.62193e-06	2.70668	0.000111903
MinimusContig_154|m.346	AP-3 complex subunit delta-1;	AP-3 complex subunit delta-1;	-2.81423	0.000134754	-2.56306	0.000111981
R1_Contig5213	.	.	1.52643	0.00270144	1.67676	0.000111981
MinimusContig_5600	.	.	1.56461	0.0283645	2.24728	0.000113671
transcript-124_1183_75PE|m.15490	Protein FAM184A;	Protein FAM184A;	-1.82707	0.0213824	-2.52164	0.000115266
transcript-95_2454	.	.	1.27526	0.000786032	1.26742	0.000115664
MinimusContig_365|m.779	Dynein beta chain, ciliary;	Dynein beta chain, ciliary;	1.71027	5.32281e-05	1.44591	0.000121039
transcript-124_44476_75PE	.	.	1.40974	0.0678911	2.34986	0.000121826
transcript-124_31035_75PE	Pre-mRNA cleavage complex 2 protein Pcf11;	.	2.23194	0.00591391	2.63308	0.000126567
R1_Contig6602|m.88536	Protein PIF;	Protein PIF;	-1.70488	0.0265946	-2.41108	0.00012707
transcript-124_93567_75PE	60S ribosomal protein L39;	.	2.06384	0.000852636	2.05269	0.000129095
MinimusContig_2529	.	.	2.25973	2.5599e-08	1.36036	0.000132
transcript-124_19110_75PE|m.32491	.	.	1.55965	0.000626063	1.51253	0.000137117
transcript-124_53052_75PE	.	.	3.46418	0.000300536	3.18282	0.00013901
transcript-124_23009_75PE|m.35677	Solute carrier family 35 member B1;	Solute carrier family 35 member B1;	4.27515	4.96433e-08	2.65254	0.000144395
Myt_cherry_idba_rep_c3291|m.90345	.	.	2.29587	0.00350073	2.54946	0.000145611
R1_Contig3422|m.86971	Nucleolar protein 56;	Nucleolar protein 56;	2.98873	6.45025e-07	2.08124	0.000145891
transcript-124_3334_75PE|m.17630	5'-3' exoribonuclease 2;	5'-3' exoribonuclease 2;	-1.47961	0.0180547	-1.96183	0.000148807
MinimusContig_1437|m.2371	1-phosphatidylinositol 4,5-bisphosphate phosphodiesterase beta-4;	1-phosphatidylinositol 4,5-bisphosphate phosphodiesterase beta-4;	-2.15897	0.0101832	-2.66728	0.000150097
transcript-124_49331_75PE	.	.	3.47148	1.26567e-07	2.21141	0.000150142
MinimusContig_2552|m.5176	Oxysterol-binding protein-related protein 1;	Oxysterol-binding protein-related protein 1;	-1.62147	0.0722954	-2.68981	0.000156761
Contig2633|m.12994	Lysine-specific demethylase 3B;	Lysine-specific demethylase 3B;	2.40684	2.80578e-06	1.75813	0.000167393
transcript-124_88110_75PE	.	.	1.50851	0.0365233	2.19996	0.000168215
R1_Contig2716	.	.	-1.61759	0.0615331	-2.58393	0.000168508
MinimusContig_950	.	.	2.39676	2.04084e-07	1.54243	0.000171559
transcript-124_6917_75PE|m.21166	N-lysine methyltransferase KMT5A-A {ECO:0000305};	N-lysine methyltransferase KMT5A-A {ECO:0000305};	3.65455	3.43306e-06	2.65562	0.000171559
Myt_cherry_idba_rep_c1864	.	.	1.72928	0.00672148	2.01922	0.000174597
transcript-124_2880_75PE|m.17161	.	.	-1.67122	0.00427951	-1.898	0.000176191
R1_Contig3391|m.86962	Neutral and basic amino acid transport protein rBAT;	Neutral and basic amino acid transport protein rBAT;	-1.8942	0.014533	-2.4261	0.000178153
transcript-124_53982_75PE	26S proteasome non-ATPase regulatory subunit 10;	.	4.03214	0.00116122	3.99585	0.000182646
Contig1725	.	.	1.78529	0.0140057	2.25727	0.000186792
MinimusContig_393	.	.	2.84743	0.000192562	2.5156	0.000187222
transcript-124_68055_75PE	.	.	2.18752	7.24004e-05	1.82074	0.000189193
MinimusContig_1613|m.2994	Protocadherin-9;	Protocadherin-9;	-1.32983	0.0265389	-1.84066	0.000191273
Myt_cherry_idba_rep_c13419	.	.	1.37467	0.0610205	2.18906	0.000193239
MinimusContig_1580|m.2912	Microtubule-associated tumor suppressor candidate 2;	Microtubule-associated tumor suppressor candidate 2;	1.31013	0.055266	-1.88524	0.00019332
MinimusContig_3462	.	.	2.45652	1.96498e-06	1.66212	0.00019574
transcript-124_51786_75PE	.	.	3.58907	0.00079378	3.43714	0.000197697
transcript-124_28037_75PE|m.39963	.	.	-2.65016	0.0126919	-3.30806	0.000200242
Myt_cherry_idba_rep_c5072	.	.	-1.67292	0.0258605	-2.28652	0.000202302
transcript-124_62661_75PE	.	.	-2.44563	0.00796298	-2.90119	0.000202669
MinimusContig_1368	.	.	1.24917	0.0123984	-1.49949	0.000203095
R2_Contig372	.	.	2.379	6.30293e-05	1.9195	0.000203095
transcript-124_1259_75PE|m.15566	Ubiquitin-associated protein 2;	Ubiquitin-associated protein 2;	-2.44198	1.26384e-05	-1.89877	0.000215515
transcript-124_24414_75PE|m.36930	Spermatogenesis-associated protein 1;	Spermatogenesis-associated protein 1;	-2.51132	0.0033824	-2.72123	0.000220176
Contig189|m.10621	.	.	1.78114	1.65284e-05	1.3748	0.000222295
R1_Contig7241	.	.	3.17186	2.49527e-07	2.023	0.000223924
MinimusContig_2849|m.5834	von Willebrand factor A domain-containing protein 3A;	von Willebrand factor A domain-containing protein 3A;	1.90998	0.00166711	1.92989	0.000233731
Contig2421|m.12799	Histone-lysine N-methyltransferase EHMT1;	Histone-lysine N-methyltransferase EHMT1;	3.13929	2.1606e-07	2.03968	0.000235447
R1_Contig2512	.	.	1.72463	0.0109463	2.08228	0.000242715
transcript-124_19099_75PE	.	.	2.45646	3.45552e-06	1.76203	0.00024394
transcript-124_7327_75PE|m.21561	Magnesium transporter NIPA2;	Magnesium transporter NIPA2;	1.8574	0.00253597	1.93227	0.000244709
R1_Contig3160	.	.	1.64273	0.0133646	2.02683	0.000249622
MinimusContig_4475|m.8565	Eukaryotic translation initiation factor 3 subunit L {ECO:0000255|HAMAP-Rule:MF_03011};	Eukaryotic translation initiation factor 3 subunit L {ECO:0000255|HAMAP-Rule:MF_03011};	-2.03309	0.0123279	-2.49277	0.000259646
MinimusContig_4787	.	.	1.45717	0.0444759	2.14546	0.000260528
MinimusContig_1412|m.2263	Histone-lysine N-methyltransferase NSD2;	Histone-lysine N-methyltransferase NSD2;	-1.4463	0.0379349	-2.06692	0.000261689
transcript-124_26399_75PE|m.38641	.	.	-1.46342	0.0348124	-2.06535	0.000262565
transcript-124_34941_75PE	.	.	3.19539	0.00573993	3.58083	0.000263828
transcript-124_65337_75PE	.	.	1.86204	0.0320085	2.59677	0.000264736
transcript-124_21390_75PE	.	.	1.92059	0.00150672	1.90854	0.000268575
Contig2337|m.12733	ADP-ribosylation factor GTPase-activating protein 3;	ADP-ribosylation factor GTPase-activating protein 2;	3.11099	3.73019e-05	2.40505	0.000272748
MinimusContig_784	.	.	-1.27819	0.0595724	-1.97261	0.000272953
transcript-124_65149_75PE|m.67530	Thymosin beta {ECO:0000305};	Thymosin beta {ECO:0000305};	-2.19477	0.0787012	-3.55324	0.000285834
Myt_cherry_idba_c5254	.	.	1.54527	0.0617455	-2.19069	0.000287328
MinimusContig_749	.	.	2.25032	0.00275735	2.33402	0.000290048
Myt_cherry_idba_rep_c5162|m.90913	Calcium uniporter protein, mitochondrial {ECO:0000305};	Calcium uniporter protein, mitochondrial {ECO:0000305};	3.29404	0.000218621	2.81101	0.000300063
transcript-124_4496_75PE|m.18880	Aprataxin and PNK-like factor;	.	1.80015	0.00468662	1.95951	0.000300735
R1_Contig1788	.	.	-2.03197	0.0104834	-2.41869	0.000305014
transcript-124_20547_75PE|m.33666	Mitochondrial tRNA-specific 2-thiouridylase 1;	Mitochondrial tRNA-specific 2-thiouridylase 1;	3.29286	1.04537e-05	2.36937	0.000308193
transcript-124_10073_75PE|m.24074	Calpain-A;	Calpain-A;	2.85752	3.33427e-08	1.66697	0.000308232
MinimusContig_1202	.	.	2.18298	0.0113812	2.6096	0.000310818
transcript-124_49188_75PE	.	.	2.90687	0.000828207	2.70522	0.000313363
Contig530	.	.	2.94223	7.96548e-07	1.86201	0.000314722
MinimusContig_583|m.1217	Mitochondrial proton/calcium exchanger protein {ECO:0000305};	Mitochondrial proton/calcium exchanger protein {ECO:0000305};	1.4769	0.00706797	1.67423	0.000316756
R1_Contig8517|m.89706	Tumor necrosis factor receptor superfamily member 6B;	Tumor necrosis factor receptor superfamily member 11B;	2.99396	0.00183193	2.97619	0.000321807
Myt_cherry_idba_rep_c11704|m.92847	B-cell receptor-associated protein 31;	B-cell receptor-associated protein 31;	5.11692	2.76669e-07	3.19499	0.00032309
MinimusContig_1596	.	.	4.12609	2.49654e-11	1.97022	0.000332351
MinimusContig_4359	.	.	3.03288	5.40864e-06	2.14163	0.000332584
transcript-124_1228_75PE	.	.	1.99368	0.0235627	2.62495	0.000340731
MinimusContig_425	.	.	2.66237	3.04496e-05	2.02442	0.000343501
transcript-124_26864_75PE	.	.	4.82146	8.12027e-07	3.13051	0.000344835
R1_Contig5205	.	.	1.39984	0.00241727	1.42074	0.000351848
R1_Contig6672|m.88613	Toll-like receptor 3;	Toll-like receptor 3;	1.22772	0.0182553	-1.30437	0.00035259
transcript-124_1663_75PE	.	.	2.7044	5.05603e-09	1.45506	0.000353844
R1_Contig5555|m.87886	Vacuolar protein sorting-associated protein 28 homolog;	Vacuolar protein sorting-associated protein 28 homolog;	1.73611	0.019738	2.21764	0.000354121
Contig1964	.	.	2.79243	9.88136e-08	1.6997	0.000356063
R2_Contig426|m.84786	Zinc finger matrin-type protein 2;	Zinc finger matrin-type protein 2;	4.59335	1.37717e-05	3.34486	0.00035901
transcript-124_20499_75PE	.	.	2.70805	4.40219e-06	1.83453	0.000362279
transcript-124_405_75PE	.	.	1.63606	0.0436469	2.33694	0.000375409
transcript-124_36651_75PE|m.46777	Kinesin-like protein KIF28P;	Kinesin-like protein KIF28P;	2.44957	0.0104041	2.86841	0.000375721
transcript-124_46_75PE|m.14159	Retrovirus-related Pol polyprotein from transposon 412;	Retrovirus-related Pol polyprotein from transposon 412;	1.28102	0.0719876	2.00915	0.000375783
Myt_cherry_idba_rep_c1091|m.89969	Inositol hexakisphosphate and diphosphoinositol-pentakisphosphate kinase 2;	Inositol hexakisphosphate and diphosphoinositol-pentakisphosphate kinase 2;	1.46496	0.0133962	-1.68486	0.000380296
transcript-124_23312_75PE|m.35934	Deoxynucleotidyltransferase terminal-interacting protein 2;	Deoxynucleotidyltransferase terminal-interacting protein 2;	2.24341	0.00263771	2.27318	0.00038293
transcript-124_4449_75PE	.	.	1.71649	0.00354137	1.7867	0.000387495
MinimusContig_919|m.1609	Mediator of RNA polymerase II transcription subunit 19;	Mediator of RNA polymerase II transcription subunit 19;	2.19534	0.00360227	2.28384	0.000399951
transcript-124_1088_75PE|m.15345	Neuroglian;	Neuroglian;	1.41963	0.00821633	1.60806	0.000404122
transcript-124_22631_75PE|m.35391	.	.	2.14155	0.0330318	2.92519	0.000408844
R1_Contig5604|m.87916	Heat shock protein 70 B2;	Heat shock 70 kDa protein 1;	-3.73524	0.000170187	-3.15935	0.000416181
transcript-124_25404_75PE	.	.	2.81106	5.59614e-05	2.14831	0.000421391
transcript-124_20100_75PE	.	.	-1.38398	0.0824348	-2.21905	0.000425215
transcript-124_6916_75PE|m.21165	N-lysine methyltransferase KMT5A-A {ECO:0000305};	N-lysine methyltransferase KMT5A {ECO:0000305};	3.91678	1.26614e-06	2.56716	0.00044359
MinimusContig_955|m.1651	T-complex protein 1 subunit theta;	T-complex protein 1 subunit theta;	1.74048	0.0309952	2.34051	0.000445414
MinimusContig_3042	.	.	2.54661	3.60759e-08	1.43519	0.000460291
R1_Contig2792	.	.	1.4549	0.00653325	1.59036	0.000460291
R2_Contig476	.	.	1.47128	0.00491626	1.5634	0.000461496
transcript-124_6344_75PE|m.20608	DNA-directed RNA polymerase III subunit RPC5;	DNA-directed RNA polymerase III subunit RPC5;	2.42147	0.000130221	1.92638	0.000464095
transcript-124_4920_75PE|m.19295	HEAT repeat-containing protein 4;	HEAT repeat-containing protein 4;	1.9134	0.00200524	1.87299	0.000468909
R1_Contig1005|m.85480	ER membrane protein complex subunit 3;	ER membrane protein complex subunit 3;	-1.67243	0.0526374	-2.43153	0.000480198
transcript-124_55546_75PE|m.60833	.	.	-2.7165	0.0353833	-3.69316	0.000480198
R1_Contig833|m.85366	Cyclin-L1;	Cyclin-L2;	-1.64477	0.0701129	-2.5237	0.000484422
transcript-124_46631_75PE	.	.	3.26632	0.00286631	3.27505	0.000488574
transcript-124_54151_75PE	.	.	1.53352	0.00652971	1.66932	0.000489813
transcript-124_721_75PE|m.14994	Neurabin-1;	Neurabin-1;	-1.91013	0.000600195	-1.70912	0.000498168
transcript-124_11447_75PE|m.25483	Monocarboxylate transporter 9;	Monocarboxylate transporter 9;	1.89293	0.019131	-2.14983	0.000511919
transcript-124_63600_75PE	.	.	4.3734	0.000626063	3.87432	0.000517166
Myt_cherry_idba_rep_c11227|m.92798	Dopamine receptor 1;	Dopamine receptor 1;	-1.89384	0.020387	-2.3654	0.000524786
transcript-124_72174_75PE	.	.	2.17879	0.000951242	1.97057	0.000527562
R1_Contig3963|m.87250	S-phase kinase-associated protein 1;	S-phase kinase-associated protein 1;	2.57309	0.00785415	2.84346	0.000532818
transcript-124_9950_75PE|m.23954	.	.	3.64551	5.11609e-05	2.7431	0.000539618
R1_Contig6374|m.88369	Tubulin beta chain;	Tubulin beta-4B chain;	1.45662	0.047048	2.05483	0.000548832
MinimusContig_6062	ER membrane protein complex subunit 7;	.	2.64879	4.05321e-06	1.74689	0.000550801
R1_Contig1372|m.85747	NADH-ubiquinone oxidoreductase 75 kDa subunit, mitochondrial;	NADH-ubiquinone oxidoreductase 75 kDa subunit, mitochondrial;	1.34027	0.00722527	1.47695	0.000558181
transcript-124_18396_75PE|m.31872	RNA-directed DNA polymerase from mobile element jockey;	Probable RNA-directed DNA polymerase from transposon BS;	2.65441	0.010353	3.00362	0.000559842
transcript-124_6618_75PE|m.20857	Coiled-coil domain-containing protein 77;	Coiled-coil domain-containing protein 77;	2.0426	0.024287	2.60377	0.000567072
transcript-124_6922_75PE|m.21177	Probable ATP-dependent RNA helicase DDX27;	Probable ATP-dependent RNA helicase DDX27;	3.11076	7.8962e-07	1.97493	0.000567072
transcript-85_12959|m.93524	Polyubiquitin-B;	Polyubiquitin-B;	2.92018	5.59614e-05	2.21162	0.000573617
transcript-124_51355_75PE	.	.	2.74969	0.00291551	2.73166	0.0005767
MinimusContig_969	.	.	1.70601	0.0109658	1.94491	0.000577074
transcript-124_30502_75PE|m.42021	Gem-associated protein 8;	Gem-associated protein 8;	2.38231	0.000180478	1.90226	0.000581051
transcript-124_251_75PE|m.14445	Dynein heavy chain 1, axonemal;	Dynein heavy chain 1, axonemal;	2.72082	4.56279e-07	1.70905	0.000581245
transcript-124_36941_75PE	.	.	-1.22155	0.0445431	-1.70734	0.000583545
transcript-124_65152_75PE|m.67533	Thymosin beta {ECO:0000305};	Thymosin beta {ECO:0000305};	-2.12397	0.00499946	-2.25463	0.00058997
MinimusContig_4618	.	.	3.05081	0.00170125	2.87695	0.000603599
MinimusContig_1337|m.1893	Cilia- and flagella-associated protein 47 {ECO:0000305};	Cilia- and flagella-associated protein 47 {ECO:0000305};	2.3221	1.62728e-09	1.20848	0.000605378
transcript-124_7838_LongLar8	.	.	1.31592	0.0971256	2.16805	0.000612647
R1_Contig1904	.	.	1.5778	0.00199722	1.51699	0.000617015
Contig3446|m.13693	.	.	1.49	0.0071749	1.61017	0.000630942
transcript-124_24889_75PE	.	.	1.67024	5.16476e-05	1.23464	0.000631343
transcript-124_65028_75PE	.	.	3.27877	4.35132e-06	2.21816	0.000649261
MinimusContig_1191	.	.	2.146	0.000951242	1.93133	0.00065256
MinimusContig_6046|m.10181	.	.	2.6927	0.0290842	3.48073	0.000656394
MinimusContig_922|m.1615	Histone-lysine N-methyltransferase SETD2;	Histone-lysine N-methyltransferase SETD2;	2.86089	0.00899966	3.1555	0.000660463
MinimusContig_121|m.250	Fibrocystin-L;	Fibrocystin-L;	1.94468	3.11788e-05	1.43448	0.000667289
Myt_cherry_idba_rep_c7096	.	.	2.32959	0.00349785	2.33653	0.0006703
transcript-124_2065_75PE|m.16341	Probable ATP-dependent RNA helicase DHX37;	Probable ATP-dependent RNA helicase DHX37;	3.80924	3.99597e-12	1.59111	0.000670792
transcript-124_73377_75PE	.	.	3.32966	0.0168078	3.95534	0.000673469
transcript-124_5818_75PE	.	.	2.20944	0.000615947	1.92317	0.000675484
R1_Contig4257	.	.	3.74137	5.3854e-06	2.46811	0.000688004
MinimusContig_615|m.1267	.	Coiled-coil domain-containing protein 154;	2.35785	0.00366348	2.36086	0.000689201
R1_Contig2343|m.86454	MICOS complex subunit Mic10;	MICOS complex subunit Mic10;	-2.1304	0.0888371	-3.35001	0.000689201
R1_Contig3664	.	.	1.96422	0.000658161	1.71988	0.000698788
Contig915|m.11494	MAM and LDL-receptor class A domain-containing protein 2;	MAM and LDL-receptor class A domain-containing protein 2;	1.74942	0.000481724	1.49762	0.000708384
transcript-124_66772_75PE|m.68559	.	.	1.9935	0.0681952	2.97552	0.000719017
transcript-124_62727_75PE	.	.	2.63341	0.0173314	3.1351	0.000719593
transcript-124_45330_75PE	.	.	-1.57376	0.000205931	-1.2783	0.000740438
Myt_cherry_idba_rep_c676	.	.	2.05749	0.000643143	1.78219	0.000749404
R1_Contig3007	.	.	3.83548	3.84306e-10	1.89614	0.000749404
Contig863|m.11431	Gelsolin-like protein 2;	Gelsolin-like protein 2;	-2.00683	0.0277777	-2.54868	0.000755159
Myt_cherry_idba_rep_c7214|m.91593	Succinate--CoA ligase [ADP/GDP-forming] subunit alpha, mitochondrial {ECO:0000255|HAMAP-Rule:MF_03222};	Succinate--CoA ligase [ADP/GDP-forming] subunit alpha, mitochondrial {ECO:0000255|HAMAP-Rule:MF_03222};	4.03165	2.27966e-06	2.56925	0.000764784
MinimusContig_5038	.	.	3.23383	1.65729e-06	1.98948	0.000790114
transcript-124_9532_75PE	.	.	2.20389	0.000290066	1.76648	0.000794838
transcript-124_48950_75PE	.	.	2.30174	0.00916746	2.5046	0.000822814
MinimusContig_679	.	.	2.76334	2.53047e-06	1.75503	0.000836863
MinimusContig_935	.	.	1.78708	0.000378537	1.45773	0.000852847
MinimusContig_846	.	.	1.89181	0.00362365	1.87019	0.000855692
Contig2981|m.13319	.	.	2.75574	0.00141065	2.5141	0.000859408
Contig9_capround1|m.10382	Coiled-coil domain-containing protein 162;	Coiled-coil domain-containing protein 162;	1.30753	0.0557649	-1.69346	0.000859446
MinimusContig_2432	.	.	3.88906	1.53025e-09	1.93666	0.000861317
MinimusContig_328|m.713	Multidrug resistance-associated protein 1;	Multidrug resistance-associated protein 1;	2.19552	0.00114943	1.96437	0.00088247
transcript-124_93605_75PE	.	.	1.57416	0.0648508	2.27569	0.000883297
MinimusContig_3048	.	.	1.47487	0.0115938	1.64082	0.000889128
R1_Contig794|m.85340	Translocon-associated protein subunit gamma;	Translocon-associated protein subunit gamma;	2.04113	0.00898278	2.20146	0.000894645
transcript-124_14275_75PE|m.28180	Kazrin;	Kazrin;	2.90986	8.01115e-05	2.15994	0.000895145
transcript-124_24728_75PE	.	.	1.81351	0.0491986	2.51465	0.000897337
transcript-124_17225_75PE|m.30777	.	.	2.52871	0.000434192	2.07014	0.000902069
transcript-124_28046_75PE|m.39964	Thioredoxin;	Thioredoxin;	4.22925	0.000458037	3.49917	0.000925233
MinimusContig_3546|m.7085	Carboxypeptidase E;	Carboxypeptidase E;	3.98925	1.10291e-07	2.29305	0.000931746
Contig2755	.	.	2.21031	2.09167e-06	-1.21318	0.000940241
R2_Contig463	.	.	2.06393	0.000235665	1.65296	0.000948043
transcript-124_1931_75PE|m.16221	MBT domain-containing protein 1;	MBT domain-containing protein 1;	2.77142	0.000800854	2.37004	0.000950248
transcript-124_576_75PE|m.14826	Coiled-coil domain-containing protein 186;	Coiled-coil domain-containing protein 186;	1.93999	0.0398691	-2.38991	0.000950248
R1_Contig3028|m.86780	Putative IQ motif and ankyrin repeat domain-containing protein LOC642574;	Putative IQ motif and ankyrin repeat domain-containing protein LOC642574;	3.89561	8.73999e-08	2.21452	0.000957377
transcript-124_73478_75PE|m.72815	.	.	2.54035	0.00756881	-2.52421	0.000961241
Contig1033|m.11636	SWI/SNF-related matrix-associated actin-dependent regulator of chromatin subfamily A member 5;	Probable global transcription activator SNF2L1;	-2.47811	0.0193092	-2.93394	0.000963254
R1_Contig7293|m.89088	Alcohol dehydrogenase class-3 chain H;	Alcohol dehydrogenase class-3 chain H;	1.59602	0.0702244	-2.1598	0.00096332
MinimusContig_925	.	.	3.8873	5.05603e-09	2.03131	0.000970999
MinimusContig_472	.	.	2.57914	1.14891e-05	1.72722	0.000998399
transcript-124_1731_75PE|m.15958	Cohesin subunit SA-1;	Cohesin subunit SA-1;	1.96929	0.0111139	2.15612	0.00100573
transcript-124_46177_75PE	.	.	2.69797	0.00322091	2.58466	0.0010162
R1_Contig7821	.	.	1.38849	0.0266326	-1.51326	0.00102439
transcript-124_373_75PE|m.14577	Protein Shroom2;	Protein Shroom2;	-1.78747	0.00688614	-1.87074	0.00110065
Contig2784	Guanine nucleotide-binding protein G(I)/G(S)/G(O) subunit gamma-12;	.	2.7107	0.000202909	2.12211	0.00111394
transcript-124_6268_75PE|m.20544	Zinc finger protein Noc;	Zinc finger protein 503;	1.83134	0.000240076	1.41335	0.00111724
transcript-124_4893_75PE|m.19267	Furin;	Furin;	1.47379	0.00371249	-1.31371	0.00112579
MinimusContig_770	.	.	-1.41168	0.0117426	-1.57089	0.00116693
MinimusContig_5845	.	.	3.90964	6.72579e-06	2.52095	0.00118169
Contig2758|m.13105	Cilia- and flagella-associated protein 58 {ECO:0000305};	Cilia- and flagella-associated protein 58 {ECO:0000305};	3.00057	1.61015e-06	1.85692	0.00119401
Myt_cherry_idba_rep_c11175|m.92774	Oligosaccharyltransferase complex subunit ostc;	Oligosaccharyltransferase complex subunit ostc;	4.72312	6.9096e-07	2.76564	0.0012025
R1_Contig5247	.	.	1.69175	0.00212999	1.5437	0.0012025
R1_Contig4682	.	.	1.70905	0.00468079	1.68449	0.00120485
R1_Contig4332	.	.	2.05006	0.00632023	2.07281	0.00121303
transcript-124_38062_75PE|m.47880	Ras-related and estrogen-regulated growth inhibitor;	Ras-related and estrogen-regulated growth inhibitor;	2.87069	0.0161551	3.23345	0.00123433
Contig191|m.10623	Phosphatase and actin regulator 1;	Phosphatase and actin regulator 1;	-2.06097	0.000601015	-1.72517	0.00123847
transcript-85_1244	.	.	1.61146	0.0190465	1.85437	0.00128276
transcript-124_49526_75PE	.	.	3.78971	3.29489e-05	2.60184	0.00130662
transcript-124_47079_75PE	.	.	2.59968	0.000627906	2.12626	0.00131993
R1_Contig1365|m.85741	Structural maintenance of chromosomes protein 4;	Structural maintenance of chromosomes protein 4;	-3.69691	3.31063e-05	-2.65832	0.00132579
transcript-124_49877_75PE	.	.	-1.28751	0.0781683	-1.87116	0.00140453
transcript-124_8224_LongLar8	.	.	1.5843	0.0411485	2.03302	0.00142366
transcript-124_18754_75PE|m.32183	.	.	4.10457	5.11832e-07	2.33928	0.00143267
transcript-124_13017_75PE	.	.	3.3093	3.19573e-07	1.81488	0.00143893
MinimusContig_874|m.1557	Far upstream element-binding protein 3;	Far upstream element-binding protein 1 {ECO:0000250|UniProtKB:Q96AE4, ECO:0000312|EMBL:AAI07943.1};	-1.83655	0.00186756	-1.6555	0.00144236
transcript-124_9396_75PE|m.23471	.	.	2.21853	0.0199362	-2.39889	0.00144236
R1_Contig3889|m.87208	.	.	2.61858	9.82605e-08	1.32491	0.00146015
Contig1975|m.12446	Coiled-coil domain-containing protein 173;	Coiled-coil domain-containing protein 173;	1.80011	0.000590404	1.47804	0.00146274
R2_Contig194|m.84652	Threonylcarbamoyladenosine tRNA methylthiotransferase;	Threonylcarbamoyladenosine tRNA methylthiotransferase;	1.41514	0.0296112	1.73421	0.00148377
R1_Contig7493|m.89230	DNA-directed RNA polymerases I and III subunit RPAC1;	DNA-directed RNA polymerases I and III subunit RPAC1;	2.95175	1.68761e-05	1.91468	0.00149756
Myt_cherry_idba_rep_c6033	.	.	1.58673	0.00408169	1.51655	0.00151675
Myt_cherry_idba_rep_c1672	.	.	-2.16329	0.00013357	-1.64605	0.00153517
R1_Contig4001|m.87281	Ubiquitin-conjugating enzyme E2 Q1;	Ubiquitin-conjugating enzyme E2 Q1;	-1.97515	0.0869707	-2.91783	0.00153608
R1_Contig24|m.84872	Tubulin alpha-1 chain;	Tubulin alpha-1 chain;	1.28847	0.00316294	1.2008	0.00157026
transcript-124_40495_75PE|m.49649	.	.	-2.06505	1.19423e-05	-1.37167	0.00160778
R1_Contig3277|m.86901	Outer dense fiber protein 2;	Outer dense fiber protein 2;	1.69364	0.025138	1.99115	0.0016082
Contig1511|m.12076	Androglobin;	Androglobin;	1.96537	0.000482968	1.57956	0.00162139
R1_Contig4675	.	.	4.37393	6.8065e-13	1.75376	0.00163116
transcript-124_50642_75PE	.	.	2.07206	0.00852529	2.11443	0.00163463
transcript-124_42220_75PE	Zinc finger protein 112;	.	2.15463	0.00450463	2.05116	0.00165231
MinimusContig_4395|m.8442	.	MAM domain-containing protein 2;	-1.97662	0.0486228	-2.58789	0.00166109
R1_Contig8500|m.89700	Metallothionein 10-III;	.	-1.88554	0.0184995	-2.1142	0.0017175
transcript-124_17798_75PE|m.31344	Ras-related protein Rab-35;	Ras-related protein Rab-35;	2.00922	0.000906415	1.64243	0.00173653
Myt_cherry_idba_rep_c4258|m.90605	Cilia- and flagella-associated protein 52 {ECO:0000312|MGI:MGI:1919110};	Cilia- and flagella-associated protein 52 {ECO:0000312|MGI:MGI:1919110};	-2.26878	0.0211516	-2.59673	0.00175641
transcript-124_3422_75PE|m.17732	Protein hinderin;	Protein hinderin;	-1.45841	0.0539823	-1.93976	0.0017608
Contig74_capround1|m.10440	PHD finger protein 3;	PHD finger protein 3;	1.2195	0.0119367	1.28869	0.00178364
R1_Contig3591	.	.	1.7967	0.00275234	1.63482	0.00178593
transcript-124_41381_75PE	.	.	2.01977	0.00187659	1.75728	0.00178797
MinimusContig_2776|m.5671	Dynein heavy chain 5, axonemal;	Dynein heavy chain 5, axonemal;	2.64732	0.000419086	2.07532	0.00179088
transcript-124_33710_75PE	.	.	3.05541	0.000559365	2.4225	0.00180825
transcript-124_29363_75PE|m.41093	.	.	2.91257	0.00186833	2.53841	0.00180922
transcript-124_4087_75PE|m.18419	Pleckstrin homology-like domain family B member 2;	Pleckstrin homology-like domain family B member 2;	3.09451	5.98047e-05	2.17597	0.00181595
transcript-124_644_75PE|m.14903	Protein JBTS17;	Protein JBTS17 {ECO:0000303|PubMed:25877302, ECO:0000303|PubMed:27158779};	2.0728	9.18128e-05	1.49583	0.00183568
Contig877|m.11457	.	.	1.65469	0.0971268	-2.31662	0.00183874
R1_Contig4151|m.87344	.	.	2.88945	8.4674e-07	1.70221	0.00184435
transcript-124_46172_75PE|m.53897	.	.	2.6635	0.000335542	2.03468	0.00185166
transcript-124_8802_75PE|m.22946	NEDD4-binding protein 2;	NEDD4-binding protein 2;	2.43314	0.000773668	1.95687	0.00185735
transcript-124_9086_75PE|m.23159	Putative uncharacterized transposon-derived protein F54H12.3;	Putative uncharacterized transposon-derived protein F54H12.3;	1.77498	0.0941511	2.64982	0.0019
R1_Contig191	.	.	2.05062	0.0193902	2.29126	0.00193667
transcript-124_64284_75PE	.	.	2.89028	9.54024e-05	2.0325	0.0019414
transcript-124_3501_75PE	.	.	1.22658	0.0127175	1.29496	0.00195704
MinimusContig_3870	.	.	3.61433	9.18961e-08	1.8934	0.00201167
R1_Contig2491	.	.	2.20915	0.00444208	2.07583	0.00201728
R1_Contig2978	.	.	2.81322	1.23495e-05	1.79263	0.00204773
transcript-124_78489_75PE	.	.	2.60474	0.00248619	2.29656	0.00207617
transcript-124_66340_75PE|m.68262	Thioredoxin domain-containing protein 3 homolog;	Thioredoxin domain-containing protein 3 homolog;	1.90756	0.0331398	2.28896	0.00208412
R1_Contig1758	.	.	2.65855	1.70264e-06	1.53128	0.00210587
transcript-124_3235_75PE	.	.	2.27727	5.04536e-05	1.54567	0.00211016
transcript-124_57698_75PE	.	.	2.31349	0.00279387	2.05504	0.00212923
transcript-124_27803_75PE|m.39778	F-box only protein 28;	F-box only protein 28;	2.67052	0.00248778	2.35151	0.00213619
transcript-124_9315_75PE|m.23404	.	.	2.94791	6.35064e-06	1.83086	0.00218848
Contig1854|m.12355	Thyroid receptor-interacting protein 11;	Thyroid receptor-interacting protein 11;	1.49692	0.0200694	1.66033	0.00219249
transcript-124_1827_75PE|m.16064	Protein RCC2;	Protein RCC2;	2.5141	0.000408221	1.9321	0.00221441
transcript-124_54529_75PE	.	.	2.44796	0.0176864	2.66433	0.00221561
R1_Contig4255	.	.	-2.04029	0.00415308	-1.90826	0.00222035
transcript-124_11473_75PE|m.25515	Vacuolar protein sorting-associated protein 13C;	Vacuolar protein sorting-associated protein 13C;	1.56684	0.0679179	-1.98324	0.00223347
MinimusContig_1095	.	.	1.29095	0.0660396	1.73795	0.0022681
Contig568|m.11111	Probable splicing factor, arginine/serine-rich 7;	Probable splicing factor, arginine/serine-rich 7;	1.67963	0.00173842	1.43945	0.00228852
Contig2183|m.12605	Heterogeneous nuclear ribonucleoprotein U-like protein 1;	.	2.27934	0.0094184	2.28715	0.00229912
R1_Contig3878	.	.	-2.70132	0.000766542	-2.214	0.0023001
transcript-124_10032_75PE	.	.	-1.43629	0.00901713	-1.45191	0.00233505
Myt_cherry_idba_rep_c1315	Perlucin-like protein {ECO:0000303|PubMed:21643827};	.	1.69378	0.000773668	1.33896	0.0023467
transcript-124_25999_75PE	.	.	1.79801	0.00974386	1.81017	0.00235308
MinimusContig_2381|m.4791	X-ray radiation resistance-associated protein 1;	X-ray radiation resistance-associated protein 1;	2.58417	0.000505866	-1.91126	0.00235588
transcript-124_11685_75PE	.	.	3.98129	8.02384e-10	1.78624	0.00236155
transcript-124_1609_75PE|m.15849	Sodium/calcium exchanger 3;	Sodium/calcium exchanger 2;	3.5202	2.96518e-06	2.03524	0.00236155
MinimusContig_1195	.	.	1.24455	0.092464	1.79665	0.00236996
MinimusContig_1720|m.3301	Homer protein homolog 2;	Homer protein homolog 2;	-1.99541	0.0642246	-2.66712	0.00239501
transcript-124_53030_75PE|m.59047	Nucleobindin-2;	Nucleobindin-2;	-1.68687	0.0195457	-1.85198	0.00239501
Contig3338|m.13612	Programmed cell death 6-interacting protein;	Programmed cell death 6-interacting protein;	-2.22584	0.000891559	-1.84746	0.00239717
R1_Contig4990	.	.	1.83072	0.00025835	1.36868	0.00239835
Myt_cherry_idba_rep_c7289	.	.	2.82452	1.82796e-07	1.46874	0.00241766
R1_Contig8065	.	.	-2.67144	0.0190385	-2.92281	0.00242127
transcript-124_77543_75PE	.	.	4.61711	4.81759e-07	2.52693	0.0024364
transcript-124_2860_75PE|m.17145	Neurexin-4;	Neurexin-4;	1.3924	0.0351866	-1.54214	0.0024388
MinimusContig_5693	.	.	3.25011	0.00569827	3.06223	0.00245704
Myt_cherry_idba_rep_c1208|m.89983	Nuclear fragile X mental retardation-interacting protein 1;	Nuclear fragile X mental retardation-interacting protein 1;	1.50939	0.0532421	1.94466	0.00246037
transcript-124_20011_75PE|m.33209	Serine/threonine-protein kinase Nek2;	Serine/threonine-protein kinase Nek2;	-2.07468	0.00331752	-1.90272	0.00246037
transcript-124_22968_75PE	.	.	3.09025	3.50531e-05	2.06917	0.00246906
MinimusContig_4097|m.8001	Visual system homeobox 2;	Visual system homeobox 2;	3.57703	0.000288511	2.64608	0.00248194
MinimusContig_2433|m.4920	.	.	2.4458	0.00144885	-1.87188	0.00249102
transcript-124_47757_75PE	.	.	1.47549	0.0686503	-1.8229	0.00249102
transcript-124_28398_75PE	.	.	2.56572	0.00346014	2.29138	0.0025017
MinimusContig_2064|m.4115	Kinesin-like protein KIF11;	Kinesin-like protein KIF11;	3.60235	2.27497e-08	1.72908	0.00251453
R1_Contig93	.	.	2.52325	0.000128453	-1.62491	0.00252886
R1_Contig192	.	.	1.52311	0.0307429	1.77295	0.00254574
R1_Contig128|m.84937	E3 ubiquitin-protein ligase MYCBP2;	E3 ubiquitin-protein ligase MYCBP2;	2.95311	2.2264e-05	1.85287	0.00255795
R1_Contig320	Serum paraoxonase/arylesterase 1 {ECO:0000303|PubMed:7916578};	.	2.75272	0.000343081	2.07216	0.00255801
MinimusContig_546|m.1163	Zinc finger protein 845;	Zinc finger protein 845;	1.64117	0.000668909	1.25924	0.00256203
transcript-124_14488_75PE	.	.	1.96874	0.000422307	1.46877	0.00268119
transcript-124_4028_75PE|m.18360	Sodium-driven chloride bicarbonate exchanger;	Sodium-driven chloride bicarbonate exchanger;	-1.89984	0.0068836	-1.8351	0.00275593
transcript-124_48590_75PE	.	.	2.08144	0.0588551	2.70682	0.00276079
Contig2858|m.13234	Actin-related protein 3;	Actin-related protein 3;	2.43136	0.000741313	1.91235	0.00277198
transcript-124_15834_75PE	.	.	1.73477	0.0269008	-1.86221	0.00279761
MinimusContig_2151|m.4305	DnaJ homolog subfamily C member 7;	DnaJ homolog subfamily C member 7;	3.11776	0.000169628	2.19661	0.00282866
MinimusContig_52	.	.	2.39929	0.00080251	1.86113	0.00283827
R1_Contig2803	.	.	3.82934	0.00079148	3.00143	0.00288882
Myt_cherry_idba_c2529	.	.	3.6512	5.52194e-08	1.80306	0.00290057
Contig1483	.	.	1.28192	0.0916534	-1.69108	0.00290461
transcript-124_3823_75PE	.	.	1.31215	0.0743717	-1.63444	0.00290927
MinimusContig_6152	.	.	1.47027	0.00280815	1.27286	0.00292708
transcript-124_41935_75PE	.	.	2.32163	0.000604669	1.75807	0.00293556
transcript-124_84758_75PE	.	.	1.96429	0.000246635	1.42762	0.00295596
transcript-124_42301_75PE	.	.	1.83731	0.0142924	1.89083	0.00296954
transcript-124_25214_75PE|m.37667	Sodium- and chloride-dependent creatine transporter 1;	Sodium- and chloride-dependent creatine transporter 1;	3.26099	0.000138466	2.252	0.00296986
transcript-124_79025_75PE	.	.	2.44706	0.0342685	2.86239	0.00301434
Contig3261|m.13547	Dynein heavy chain 2, axonemal;	Dynein heavy chain 2, axonemal;	1.56684	0.0038862	1.40465	0.00303003
transcript-124_23277_75PE	.	.	2.39692	0.00931922	2.33432	0.00303003
transcript-124_59563_75PE	.	.	1.90849	0.0431425	2.31813	0.00305831
transcript-124_93480_75PE	Dynein light chain 2, cytoplasmic;	.	1.69361	0.0131258	1.72521	0.00306282
transcript-124_43353_75PE	.	.	2.24306	0.00452625	-1.90165	0.00306628
transcript-124_4867_75PE|m.19252	Glutamate-rich protein 6;	Glutamate-rich protein 6;	2.67231	0.0066708	2.50462	0.00307604
R1_Contig4126|m.87331	14-3-3-like protein 1;	14-3-3 protein beta/alpha-1;	2.87488	0.00710032	2.71428	0.00308796
Contig542|m.11090	Nucleolar RNA helicase 2 {ECO:0000305};	Nucleolar RNA helicase 2 {ECO:0000305};	2.32907	0.000494045	1.76844	0.00310673
R1_Contig3169	.	.	3.19473	4.98373e-07	1.67103	0.00316161
MinimusContig_933	.	.	1.42794	0.00460912	1.29379	0.00317573
transcript-55_5249	.	.	3.27369	8.12027e-07	1.75336	0.00324777
MinimusContig_922|m.1613	Histone-lysine N-methyltransferase SETD2;	Histone-lysine N-methyltransferase SETD2;	1.89648	3.07436e-05	1.23017	0.00334085
MinimusContig_1019	.	.	3.27628	2.19712e-06	1.80968	0.00336364
transcript-124_3221_LongLar8	.	.	3.54443	1.23651e-05	2.18543	0.00339005
transcript-124_69268_75PE	.	.	2.44763	0.00084253	1.90394	0.00339005
transcript-124_79688_75PE	.	.	4.57596	0.00186288	3.77497	0.00342391
transcript-124_7804_75PE|m.21981	Thyroid peroxidase;	Thyroid peroxidase;	1.68498	0.021943	-1.68722	0.00343698
R1_Contig8518|m.89707	Tumor necrosis factor receptor superfamily member 6B;	Tumor necrosis factor receptor superfamily member 11B;	2.75614	0.00946812	2.65978	0.00343766
Contig304|m.10777	Growth/differentiation factor 10;	Growth/differentiation factor 10;	1.60887	0.0671205	-1.93582	0.00345996
transcript-124_51494_75PE	.	.	-1.90324	0.0614535	-2.4349	0.0035173
transcript-124_25673_75PE|m.38023	.	.	2.28805	0.00259352	1.9205	0.0035294
R1_Contig864|m.85390	.	.	2.41259	0.000606693	1.83142	0.00353495
transcript-124_27359_75PE|m.39427	.	.	-1.81512	0.0504294	-2.23654	0.00359829
transcript-124_42830_75PE	.	.	2.47571	0.00260652	2.07601	0.00362013
MinimusContig_1676|m.3208	pre-mRNA 3' end processing protein WDR33;	pre-mRNA 3' end processing protein WDR33;	1.74596	0.00804641	1.64114	0.00364809
transcript-124_5012_75PE|m.19390	MORC family CW-type zinc finger protein 3;	MORC family CW-type zinc finger protein 3;	2.79251	9.40782e-05	1.84627	0.00365502
transcript-124_30217_75PE	.	.	1.89862	0.00235083	1.59927	0.00365641
transcript-124_39927_75PE|m.49215	.	.	-2.29072	0.0213118	-2.45203	0.00379585
MinimusContig_161|m.359	26S proteasome non-ATPase regulatory subunit 2;	26S proteasome non-ATPase regulatory subunit 2;	1.38746	0.064517	1.77221	0.00380713
transcript-124_39869_75PE|m.49181	Ribosomal RNA processing protein 36 homolog;	Ribosomal RNA processing protein 36 homolog;	1.64374	0.0915439	2.27912	0.00382079
Contig2702	.	.	1.49726	0.0576409	-1.71862	0.00384979
MinimusContig_1774|m.3469	Succinate dehydrogenase [ubiquinone] flavoprotein subunit, mitochondrial;	Succinate dehydrogenase [ubiquinone] flavoprotein subunit, mitochondrial;	-1.76908	0.0299314	-1.97685	0.00388987
transcript-124_11239_75PE	.	.	1.249	0.0210624	-1.20468	0.00392795
transcript-124_19852_75PE	.	.	-1.43455	0.0838859	-1.93411	0.00396076
transcript-124_43077_75PE|m.51710	Annexin A7;	Annexin A7;	-1.57894	0.0388892	-1.83483	0.00398732
transcript-124_34006_75PE	.	.	1.28413	0.0931477	1.76868	0.0040023
transcript-124_24946_75PE|m.37370	40S ribosomal protein S9 {ECO:0000250|UniProtKB:P55935};	40S ribosomal protein S9 {ECO:0000250|UniProtKB:P55935};	1.35762	0.040763	1.58566	0.00404048
MinimusContig_6177	.	.	3.04201	3.29489e-05	1.88404	0.00407784
R1_Contig4083	.	.	1.4269	0.0321839	1.6087	0.00408198
MinimusContig_3616	.	.	2.39971	3.39378e-06	1.31128	0.00410532
transcript-124_14683_75PE|m.28509	Cytochrome P450 3A29;	Cytochrome P450 3A29;	2.82695	0.00136853	2.21795	0.00410994
transcript-124_928_75PE|m.15230	Poly [ADP-ribose] polymerase 14;	Poly [ADP-ribose] polymerase 14;	1.90999	0.00202895	1.54008	0.00415505
transcript-124_2334_75PE|m.16579	Coiled-coil domain-containing protein 146;	Coiled-coil domain-containing protein 146;	2.76593	5.84047e-05	1.8107	0.00415637
Myt_cherry_idba_rep_c2700	.	.	1.98413	0.00831662	1.84656	0.00425268
R1_Contig6377	.	.	3.42634	2.40751e-07	1.78577	0.00425268
MinimusContig_2422|m.4901	.	.	1.32798	0.0319143	1.48362	0.00425732
Contig1205	.	.	2.1659	0.0132057	2.13074	0.00426522
Myt_cherry_idba_rep_c6741|m.91424	CDK5 regulatory subunit-associated protein 3 {ECO:0000305};	CDK5 regulatory subunit-associated protein 3 {ECO:0000305};	1.92878	0.0193388	1.99611	0.00428123
R1_Contig214|m.84991	Innexin unc-9;	Innexin unc-9;	1.82564	0.0258605	1.97097	0.00429114
R1_Contig5250	.	.	1.443	0.0195477	1.49539	0.00432485
Contig926	.	.	-1.54393	0.0174313	-1.60415	0.00434959
transcript-124_4842_75PE	.	.	1.65475	0.00270949	1.36404	0.00434959
R1_Contig6562|m.88491	Uncharacterized protein C6orf118;	Uncharacterized protein C6orf118;	2.86705	3.2917e-05	1.74151	0.00439072
transcript-124_40810_75PE	.	.	2.26503	0.00334555	1.90558	0.00439208
R1_Contig2612	.	.	2.3341	8.3411e-05	1.49709	0.00440688
transcript-124_38996_75PE	.	.	2.57536	0.000398276	1.81346	0.00442792
transcript-124_12295_75PE|m.26309	Translocation protein SEC63 homolog;	Translocation protein SEC63 homolog;	2.1618	0.00204122	1.76553	0.00444024
transcript-75_2566	.	.	2.86005	1.9926e-06	1.52825	0.00444784
MinimusContig_4926	.	.	1.3948	0.0930978	-1.76244	0.00451858
MinimusContig_4588	.	.	3.12035	3.59387e-08	1.46407	0.00452614
MinimusContig_1472	.	.	1.34371	0.0157391	1.34694	0.00455357
transcript-124_36463_75PE	.	.	2.12079	0.000507175	1.50538	0.00460969
transcript-124_31907_75PE|m.43128	.	.	2.81183	2.37335e-05	1.73882	0.0046267
MinimusContig_85	.	.	3.02156	1.68849e-05	1.75937	0.00467762
R1_Contig2783	.	.	1.92514	0.0336985	2.14479	0.00470511
MinimusContig_76|m.113	Protein CBFA2T3;	Protein CBFA2T3;	2.49814	0.000862518	1.86585	0.00471078
R1_Contig3035	.	.	3.10237	2.864e-06	1.68607	0.00476316
MinimusContig_378|m.808	Collagen alpha-6(VI) chain;	Collagen alpha-6(VI) chain;	-2.48299	6.02028e-05	-1.62373	0.00476407
transcript-124_33051_75PE	.	.	1.47919	0.0343891	1.65102	0.00477762
MinimusContig_2300	.	.	3.06196	1.92858e-07	1.44822	0.00478507
Contig3428|m.13678	Polyadenylate-binding protein 1;	Polyadenylate-binding protein 1;	3.02023	0.000642882	2.19043	0.00493841
transcript-124_1697_75PE|m.15915	.	.	1.64851	0.0173897	1.65969	0.0049562
Contig2827	.	.	2.03212	2.64992e-05	1.25026	0.00499078
transcript-124_58159_75PE|m.62695	.	.	3.58543	0.0217021	3.70737	0.00502688
transcript-124_18657_75PE|m.32090	Mesenchyme-specific cell surface glycoprotein;	Mesenchyme-specific cell surface glycoprotein;	1.57801	0.0425553	-1.67282	0.0050685
transcript-124_30568_75PE	.	.	1.53939	0.0944172	2.09425	0.0051307
transcript-124_76524_75PE	.	.	3.3474	0.000950877	2.50295	0.00516661
transcript-124_35482_75PE	.	.	2.01664	0.00373866	1.70732	0.00517489
R1_Contig7351|m.89127	Follistatin;	Follistatin;	5.14963	1.69339e-07	2.50907	0.0052346
transcript-124_3527_75PE|m.17892	.	.	-3.02928	0.000104171	-2.0428	0.00526075
transcript-124_50018_75PE|m.56875	.	.	1.77371	0.00756881	1.61004	0.00528936
R1_Contig7699|m.89335	ATP synthase subunit b, mitochondrial;	ATP synthase subunit b, mitochondrial;	3.04472	3.39311e-05	1.89212	0.00532822
transcript-124_11403_75PE	.	.	2.20322	0.00635761	1.95293	0.00534516
transcript-124_13232_75PE	.	.	2.89605	0.000207153	1.94093	0.00534516
transcript-124_83810_75PE	.	.	3.97585	0.00119883	3.02578	0.00539961
Contig2982|m.13322	Protein SOGA3;	Protein SOGA3;	2.17115	0.000300536	1.51459	0.00541219
transcript-124_37091_75PE	.	.	4.05201	1.00837e-06	2.0777	0.00543556
MinimusContig_4675	.	.	-1.58848	0.0443766	-1.84124	0.00551711
R1_Contig8257	.	.	3.08104	4.385e-05	1.86737	0.00551711
MinimusContig_1007	.	.	3.49148	6.39091e-05	2.18194	0.0055173
MinimusContig_1529|m.2665	Centrosomal protein of 290 kDa;	Centrosomal protein of 290 kDa;	3.9409	2.94553e-10	1.64366	0.00552813
Myt_cherry_idba_rep_c2598	.	.	2.69938	4.04227e-05	1.61945	0.00554072
Contig3320	.	.	3.0162	1.31488e-05	1.78111	0.00555563
MinimusContig_1534|m.2673	Microprocessor complex subunit DGCR8;	Microprocessor complex subunit DGCR8;	4.26223	5.23423e-10	1.78573	0.00558505
R1_Contig2611	.	.	1.31952	0.062323	1.61566	0.00558505
transcript-124_38636_75PE	.	.	1.68511	0.0380256	1.88485	0.00558505
transcript-124_39929_75PE|m.49219	.	.	-1.76115	0.0874348	-2.31567	0.00559552
transcript-124_38305_75PE	.	.	2.45811	0.00131242	1.86162	0.00559665
MinimusContig_2510|m.5086	Zinc finger CCCH domain-containing protein 13;	Zinc finger CCCH domain-containing protein 13;	1.49253	0.00712874	1.33708	0.00562625
Myt_cherry_idba_rep_c2910	.	.	1.95871	0.00572956	1.69283	0.00563109
transcript-124_74922_75PE|m.73727	Oxidoreductase HTATIP2;	Oxidoreductase HTATIP2;	2.72101	0.0016639	2.09876	0.00569374
MinimusContig_6228	.	.	-1.32975	0.0439727	-1.537	0.00570307
MinimusContig_5370	.	.	2.48157	1.73846e-05	1.3989	0.0057335
R1_Contig4174	.	.	2.19385	0.00122349	1.63394	0.00574922
transcript-124_64883_75PE	.	.	2.10124	0.000378577	1.44592	0.00576999
Contig155_capround1	.	.	-2.16901	0.0153501	-2.13624	0.00581418
Myt_cherry_idba_rep_c1941|m.90140	Valine--tRNA ligase;	Valine--tRNA ligase;	2.17009	0.0167555	2.1266	0.0058388
R1_Contig2597	.	.	1.68394	0.0427608	1.90679	0.00595947
Contig3224|m.13520	Thrombospondin type-1 domain-containing protein 7B;	Thrombospondin type-1 domain-containing protein 7B;	2.26339	0.000105413	1.42677	0.00602658
MinimusContig_3505	.	.	1.78857	0.00364869	1.4634	0.00603289
R1_Contig182	40S ribosomal protein S27;	.	1.26522	0.0201086	1.27289	0.00605897
transcript-124_16936_75PE|m.30517	.	.	2.84682	0.000482968	2.00289	0.00605897
Contig611	.	.	2.72744	2.80578e-06	1.49651	0.00608407
MinimusContig_1390|m.2179	Nesprin-1;	Nesprin-1;	2.0138	0.000229405	1.36266	0.00612164
R1_Contig4331	.	.	3.4523	0.000126705	2.20025	0.00612164
transcript-124_20858_75PE	.	.	3.27967	3.40314e-05	1.93442	0.00612164
Myt_cherry_idba_rep_c1013|m.89955	Sodium/hydrogen exchanger 9B2;	Sodium/hydrogen exchanger 9B2;	2.52998	0.00144016	1.90644	0.00613102
Contig734|m.11305	.	.	2.15602	0.00300457	1.73008	0.00613559
Contig331|m.10814	Zinc finger RNA-binding protein;	Zinc finger RNA-binding protein;	2.18746	0.0485775	2.52919	0.00613732
R1_Contig1442	Glutathione peroxidase;	.	1.6361	0.00578142	-1.2363	0.00615133
R1_Contig5708|m.87964	60S ribosomal protein L23a;	60S ribosomal protein L23a;	1.91088	0.000464291	1.35064	0.00624608
transcript-124_12413_75PE|m.26377	Nicotinate phosphoribosyltransferase;	Nicotinate phosphoribosyltransferase;	2.03042	0.00161608	1.53691	0.00626464
R1_Contig3615|m.87075	Gigasin-6 {ECO:0000303|Ref.2};	Gigasin-6 {ECO:0000303|Ref.2};	2.07234	9.56741e-05	1.28828	0.00627611
transcript-124_22_75PE|m.14117	.	.	-2.12702	0.000208813	-1.44154	0.00630483
Myt_cherry_idba_rep_c10889|m.92694	Pre-rRNA-processing protein TSR1 homolog;	Pre-rRNA-processing protein TSR1 homolog;	2.97683	0.00257435	2.35809	0.00632144
transcript-124_62786_75PE|m.65951	.	.	-2.33575	0.000752633	-1.73356	0.00632366
Contig286|m.10751	Nuclear factor NF-kappa-B p105 subunit;	Nuclear factor NF-kappa-B p105 subunit;	-1.35054	0.0504054	-1.57119	0.00637426
transcript-124_1268_75PE|m.15575	Serine/threonine-protein kinase 38-like;	Serine/threonine-protein kinase 38-like;	2.70772	0.000302757	1.79933	0.00641281
R2_Contig29	.	.	1.74499	0.00616274	1.49611	0.00641989
Contig42	.	.	1.91735	0.0265946	1.99333	0.00643113
R1_Contig3233	.	.	-1.83659	0.023581	-1.89389	0.00669816
R1_Contig7673	Ubiquitin-conjugating enzyme E2-17 kDa;	.	3.58582	5.5466e-06	1.94769	0.00684631
Contig2820|m.13187	H/ACA ribonucleoprotein complex subunit 4;	H/ACA ribonucleoprotein complex subunit 4;	2.92117	1.41064e-06	1.54355	0.00685167
Contig3294	.	.	2.15435	4.81433e-05	1.27495	0.00686877
MinimusContig_146|m.313	Chromodomain-helicase-DNA-binding protein 7;	Chromodomain-helicase-DNA-binding protein 8 {ECO:0000255|HAMAP-Rule:MF_03071};	1.80401	0.00114111	1.34457	0.00686877
transcript-124_49088_75PE	.	.	1.88944	0.019039	1.85236	0.00686877
transcript-124_6636_75PE|m.20871	Pentatricopeptide repeat domain-containing protein 3, mitochondrial;	Pentatricopeptide repeat domain-containing protein 3, mitochondrial;	-2.05228	0.0181481	-2.02693	0.00687787
R1_Contig1865	.	.	1.86669	0.0829132	-2.27998	0.00691188
transcript-124_8815_75PE	.	.	-1.70859	0.02096	-1.72552	0.00704446
transcript-124_372_75PE|m.14576	Protein Shroom2;	Protein Shroom2;	-1.69245	0.00482386	-1.45269	0.00704749
transcript-124_3664_75PE|m.17974	.	.	2.90304	1.41982e-05	1.61307	0.00706925
transcript-124_10738_75PE|m.24753	Ketosamine-3-kinase;	Fructosamine-3-kinase;	2.45337	0.0100691	2.2069	0.00713553
transcript-124_62578_75PE	.	.	2.66504	2.34088e-05	1.52879	0.00716037
MinimusContig_5489|m.9699	.	.	1.86435	0.0312197	1.95974	0.00719179
transcript-124_69526_75PE	.	.	3.6141	0.0190264	3.52559	0.00722724
transcript-124_34425_75PE|m.45037	Transcription factor 19;	Transcription factor 19;	1.41482	0.0524695	1.62467	0.00735348
MinimusContig_1258	.	.	-1.99482	0.00897185	-1.80749	0.00751953
transcript-124_42331_75PE|m.51104	.	.	-2.01049	0.00134567	-1.51303	0.00751953
MinimusContig_972	.	.	1.72528	0.0452377	1.92304	0.00757359
R1_Contig501	.	.	3.24663	2.34582e-06	1.65468	0.00764885
R1_Contig2882	.	.	4.07547	2.04084e-07	1.88466	0.00774149
transcript-124_50339_75PE	.	.	3.91327	1.08517e-06	1.98707	0.00781369
transcript-124_6151_75PE|m.20447	Translocating chain-associated membrane protein 1-like 1;	Translocating chain-associated membrane protein 1-like 1;	1.63748	0.0452124	-1.68181	0.00783501
MinimusContig_4770	.	.	-2.04188	0.0117953	-1.87673	0.00787143
Contig3234|m.13530	.	.	1.49665	0.00963023	1.32042	0.00787624
transcript-124_868_75PE|m.15174	MOG interacting and ectopic P-granules protein 1;	.	1.22486	0.0914925	1.56579	0.00787624
transcript-124_7838_75PE|m.22002	.	.	1.49927	0.0462575	1.67279	0.00796024
Myt_cherry_idba_rep_c1870	.	.	2.24545	0.000116329	1.36104	0.00796636
transcript-124_14946_75PE|m.28756	Cilia- and flagella-associated protein 251 {ECO:0000305};	Cilia- and flagella-associated protein 251 {ECO:0000305};	2.22733	0.00582935	1.85616	0.00801523
transcript-124_757_LongLar8	.	.	2.17301	0.00845298	1.90523	0.00809575
transcript-124_16414_75PE|m.30062	CCR4-NOT transcription complex subunit 3;	CCR4-NOT transcription complex subunit 3;	2.5367	0.00015793	1.58173	0.00816092
transcript-124_34617_75PE	.	.	1.85764	0.0402394	-1.87219	0.00825031
MinimusContig_557	.	.	3.39935	3.81727e-09	1.43843	0.00826271
transcript-124_24064_75PE	.	.	1.9202	0.00058506	1.33307	0.00832085
Contig240|m.10704	Isoleucine--tRNA ligase, cytoplasmic;	Isoleucine--tRNA ligase, cytoplasmic;	1.6038	0.0113356	-1.29971	0.00834577
transcript-124_3516_75PE|m.17882	NF-X1-type zinc finger protein NFXL1;	NF-X1-type zinc finger protein NFXL1;	1.20872	0.0338202	1.26494	0.00847432
MinimusContig_1266	.	.	1.95149	0.00246259	1.47824	0.00848216
R1_Contig1285|m.85683	.	.	2.49094	0.0026787	1.9122	0.00850181
Contig71_capround1|m.10439	E3 ubiquitin-protein ligase RNF13;	E3 ubiquitin-protein ligase RNF13;	1.955	0.00979296	1.71959	0.00852537
R1_Contig3253	.	.	1.62178	0.00214841	1.21582	0.00869463
transcript-124_24929_75PE	40S ribosomal protein S9 {ECO:0000250|UniProtKB:P55935};	.	1.60616	0.0185888	1.53449	0.00871191
MinimusContig_777|m.1463	Kinesin heavy chain;	Kinesin heavy chain;	1.71495	0.00762618	-1.36923	0.00884561
MinimusContig_2945|m.6022	Protein transport protein Sec23A;	Protein transport protein Sec23A;	1.561	0.0223407	1.52294	0.00887265
R1_Contig2908	.	.	-1.88592	0.00279355	-1.50127	0.00892775
MinimusContig_1719|m.3300	.	.	-2.60936	1.52911e-06	-1.4024	0.00897228
Contig271|m.10732	Catenin beta;	Catenin beta;	2.43105	0.00147452	1.75364	0.00907521
Contig1007	.	.	2.72887	1.41484e-06	1.32177	0.00909729
transcript-124_20462_75PE|m.33598	Zinc finger MYND domain-containing protein 12;	Zinc finger MYND domain-containing protein 12;	3.27628	0.000225656	2.07331	0.00913199
transcript-124_45904_75PE|m.53721	Probable 39S ribosomal protein L24, mitochondrial;	Probable 39S ribosomal protein L24, mitochondrial;	2.32758	0.0273818	2.32938	0.00915033
transcript-124_15593_75PE	.	.	2.18706	0.00125403	1.54724	0.00916335
transcript-124_446_75PE|m.14654	Receptor-type tyrosine-protein phosphatase T;	Receptor-type tyrosine-protein phosphatase mu;	-2.00648	0.00134468	-1.4954	0.00918153
transcript-124_440_75PE|m.14652	Nesprin-1;	Nesprin-1;	1.71271	0.0041003	1.37579	0.00921349
transcript-124_7855_75PE|m.22020	.	.	2.00165	0.0130135	1.8	0.00926551
transcript-124_2973_75PE|m.17231	Macrophage mannose receptor 1;	Macrophage mannose receptor 1;	1.99902	0.000653814	1.33403	0.0092797
transcript-124_2785_75PE|m.17093	Putative IQ motif and ankyrin repeat domain-containing protein LOC642574;	Putative IQ motif and ankyrin repeat domain-containing protein LOC642574;	3.11486	1.98245e-07	1.4616	0.00946489
MinimusContig_1290	.	.	2.05854	0.00162345	1.51667	0.00957286
transcript-124_69488_75PE|m.70266	.	.	2.27783	0.00980635	1.98108	0.00960364
transcript-124_59001_75PE|m.63274	Apolipoprotein D;	Apolipoprotein D;	-2.13844	0.0201244	-2.0557	0.00963218
transcript-124_11424_75PE|m.25456	Proliferation marker protein Ki-67 {ECO:0000305};	Proliferation marker protein Ki-67 {ECO:0000305};	1.20503	0.0991554	1.53668	0.00970878
transcript-124_8043_LongLar8	.	.	1.84261	0.00491626	1.49482	0.0097577
transcript-124_85136_75PE	.	.	2.43806	0.00560078	1.97432	0.00993937
Myt_cherry_idba_rep_c4624|m.90741	Proteasome subunit beta type-1;	Proteasome subunit beta type-1;	1.92793	0.0369349	-1.91938	0.00994845
R1_Contig7477|m.89216	Tubulin-specific chaperone A;	Tubulin-specific chaperone A;	2.92724	0.00079148	2.01596	0.00998869
MinimusContig_4519	.	.	1.41108	0.0199607	-1.23697	0.0100946
transcript-124_76276_75PE	.	.	2.4406	0.00696068	2.01518	0.0102571
transcript-124_66118_75PE	.	.	-2.78061	0.00401768	-2.23797	0.0102846
transcript-124_28720_75PE	.	.	1.79494	0.0385595	1.87698	0.0102912
transcript-124_36913_75PE|m.46930	Proteasome subunit alpha type-2;	Proteasome subunit alpha type-2;	2.26229	0.0237554	2.18443	0.0104023
R1_Contig3955	.	.	2.02495	0.00152037	1.47344	0.0104409
transcript-124_90477_75PE|m.82914	.	.	1.5814	0.0640869	1.81519	0.0104783
transcript-124_21959_75PE|m.34762	Cyclic AMP-responsive element-binding protein 3-like protein 2;	Cyclic AMP-responsive element-binding protein 3-like protein 2;	1.65075	0.017698	1.53437	0.0104783
MinimusContig_3707	.	.	1.25032	0.0664985	-1.30717	0.0105101
MinimusContig_148	.	.	1.4587	0.0121975	1.29333	0.0105629
transcript-124_68279_75PE	.	.	1.39862	0.0160944	1.28143	0.0105771
transcript-124_3410_75PE|m.17724	Serine/threonine-protein phosphatase 6 regulatory ankyrin repeat subunit B;	Ankyrin-3 {ECO:0000303|PubMed:7836469};	1.81605	0.0017071	1.33011	0.0106223
Myt_cherry_idba_rep_c11778	.	.	3.15401	0.000696014	2.11039	0.0106463
transcript-124_50828_75PE	.	.	-1.38346	0.032396	-1.42093	0.0106816
Myt_cherry_idba_rep_c10841	.	.	2.51702	0.000378226	1.59204	0.0107871
Myt_cherry_idba_rep_c1290|m.90002	Apolipophorins;	.	2.72367	0.00236681	-1.90097	0.0107871
transcript-124_30216_75PE	.	.	2.68652	0.00158819	1.91851	0.0108248
transcript-124_2921_75PE	.	.	2.68651	0.00213579	1.96088	0.0108645
transcript-124_46761_75PE|m.54325	.	.	1.74652	0.00135536	1.25056	0.0108965
MinimusContig_1513|m.2577	Chromatin assembly factor 1 subunit A;	Chromatin assembly factor 1 subunit A;	-2.54657	1.41507e-05	-1.42538	0.0109028
Myt_cherry_idba_c7790|m.91812	Methionine-R-sulfoxide reductase B3, mitochondrial;	Methionine-R-sulfoxide reductase B3, mitochondrial;	2.66311	0.00386634	2.052	0.0109466
transcript-124_162_75PE|m.14323	Cytoplasmic dynein 1 heavy chain 1;	Cytoplasmic dynein 1 heavy chain 1;	1.83304	0.000861111	-1.21746	0.0110816
R1_Contig3995|m.87278	Rab GDP dissociation inhibitor beta;	Rab GDP dissociation inhibitor beta;	5.64691	4.81932e-12	1.91634	0.011133
transcript-124_33419_75PE	.	.	2.32483	0.00218008	1.69242	0.0111855
transcript-124_60717_75PE	.	.	2.84134	0.014681	2.54299	0.0112128
Contig3209|m.13501	Guanine nucleotide-binding protein subunit beta {ECO:0000250|UniProtKB:P23232};	Guanine nucleotide-binding protein subunit beta {ECO:0000250|UniProtKB:P23232};	-1.85998	0.0621265	-2.10595	0.0112562
Contig1298|m.11888	Nuclear inhibitor of protein phosphatase 1;	Nuclear inhibitor of protein phosphatase 1;	1.90092	0.00168573	1.33922	0.0112688
transcript-124_239_75PE|m.14442	Inactive ubiquitin carboxyl-terminal hydrolase 54;	Inactive ubiquitin carboxyl-terminal hydrolase 54;	3.17878	8.68974e-08	1.39568	0.0113213
transcript-124_60924_75PE	.	.	2.9309	1.47453e-06	1.44357	0.011486
transcript-124_40742_75PE	.	.	2.35075	0.0125673	2.0521	0.0114945
transcript-124_42132_75PE|m.50911	.	.	2.4386	0.0163642	2.20185	0.0114945
transcript-124_64213_75PE	TLC domain-containing protein 2;	.	2.10097	0.0771863	2.47475	0.0114947
transcript-124_57290_75PE|m.62104	Abnormal spindle-like microcephaly-associated protein homolog;	Abnormal spindle-like microcephaly-associated protein homolog;	1.72999	0.0129967	1.51128	0.0115277
Myt_cherry_idba_c8896	.	.	3.05745	5.3854e-06	1.55834	0.0116777
R1_Contig5764	.	.	3.48627	2.21084e-05	1.93513	0.0117455
transcript-124_9106_75PE|m.23186	.	N-myc-interactor;	2.00498	0.00429986	-1.41903	0.011791
transcript-124_9508_75PE	.	.	1.7623	0.00346072	1.34466	0.0118624
Contig193|m.10625	Zinc finger C3H1 domain-containing protein;	Zinc finger C3H1 domain-containing protein;	1.93162	0.0021109	-1.27918	0.0119118
MinimusContig_293|m.626	MAGUK p55 subfamily member 5;	MAGUK p55 subfamily member 5;	2.36524	0.00195767	1.71885	0.0119304
transcript-124_683_75PE|m.14960	DNA topoisomerase 2-beta;	DNA topoisomerase 2-beta;	1.61244	0.00273089	1.20895	0.0119434
MinimusContig_211|m.474	Myosin-IIIa;	Myosin-IIIa;	3.32405	6.22111e-09	1.33078	0.012045
transcript-124_10993_LongLar8	.	.	-2.11147	0.00241727	-1.5792	0.0121158
MinimusContig_2464	.	.	1.38577	0.0622617	1.54701	0.012183
MinimusContig_429|m.939	Lymphoid-restricted membrane protein;	Lymphoid-restricted membrane protein;	-1.61459	0.091762	-1.96776	0.0122095
Contig137_capround1	.	.	2.38377	0.0326753	2.36354	0.0122863
transcript-124_12480_75PE	.	.	2.28007	0.000219234	1.36262	0.0123257
R1_Contig4736	.	.	2.31706	0.0061501	1.8666	0.0123517
Contig1196	.	.	2.37763	6.62116e-05	1.37419	0.0125866
R1_Contig2746	.	.	2.14823	0.0739805	2.46969	0.0126197
transcript-124_8233_75PE|m.22384	Type I inositol 1,4,5-trisphosphate 5-phosphatase;	Type I inositol 1,4,5-trisphosphate 5-phosphatase;	2.52669	0.00170568	1.76715	0.0127012
R1_Contig1102	.	.	1.78918	0.0611805	1.9808	0.0127691
MinimusContig_3997	.	.	2.26829	0.000400952	1.4032	0.0127884
transcript-124_24833_75PE|m.37264	UPF0764 protein C16orf89 homolog;	UPF0764 protein C16orf89 homolog;	2.31765	0.00406023	-1.64967	0.0128353
MinimusContig_804	.	.	2.69318	2.1606e-07	1.23054	0.0128794
MinimusContig_200|m.447	Protein phosphatase 1 regulatory subunit 12A;	Protein phosphatase 1 regulatory subunit 12A;	-1.51356	0.0342156	-1.51324	0.0128908
transcript-124_58425_75PE|m.62874	.	.	-1.68004	0.0590689	-1.84289	0.0130492
MinimusContig_2921|m.5969	Palmitoyltransferase ZDHHC3 {ECO:0000305};	Palmitoyltransferase ZDHHC3 {ECO:0000305};	1.86387	0.028977	1.7972	0.0130659
transcript-124_30415_75PE|m.41920	Transcription initiation factor TFIID subunit 11;	Transcription initiation factor TFIID subunit 11;	2.31538	0.0167178	-1.95058	0.0130659
Contig1880	.	.	1.62585	0.0528512	-1.62329	0.0131225
Contig2571|m.12928	Cdc42 homolog;	Cdc42 homolog;	3.04396	1.00538e-05	1.60464	0.0131735
transcript-124_66113_75PE	.	.	2.35958	0.00338078	1.74544	0.0131802
R2_Contig466|m.84816	T-complex protein 1 subunit alpha;	T-complex protein 1 subunit alpha;	2.82563	7.15176e-05	1.62999	0.0132743
transcript-124_8647_75PE|m.22799	Neurogenic differentiation factor 1;	Neurogenic differentiation factor 6-A;	1.53624	0.0964497	1.87036	0.0132743
transcript-124_4715_75PE|m.19117	Solute carrier family 35 member E1 homolog;	Solute carrier family 35 member E1 homolog;	1.45478	0.0504359	1.54488	0.0132764
transcript-124_83217_75PE	.	.	3.04271	0.00168865	2.12113	0.0133121
transcript-124_51250_75PE	.	.	1.844	0.0429839	1.89651	0.0133714
transcript-124_80333_75PE	.	.	2.3409	0.000562105	1.51975	0.0134563
MinimusContig_2289|m.4638	WD repeat-containing protein 44;	WD repeat-containing protein 44;	1.42227	0.0213118	1.30531	0.0134844
transcript-124_13143_75PE	Peptidyl-prolyl cis-trans isomerase-like 6;	.	2.10587	0.0216237	-1.81384	0.0138275
Myt_cherry_idba_rep_c3481|m.90388	Probable ATP-dependent RNA helicase DDX20;	Probable ATP-dependent RNA helicase DDX20;	1.81687	0.00118321	1.20294	0.0139589
transcript-124_13204_75PE	.	.	1.41162	0.0237554	1.30671	0.0141596
R1_Contig6640|m.88577	Heat shock protein 70 B2;	Heat shock protein 70 B2;	4.71194	2.01389e-09	1.79482	0.0142239
transcript-124_1350_75PE|m.15655	tRNA 2'-phosphotransferase 1;	tRNA 2'-phosphotransferase 1;	1.35183	0.0651425	-1.39749	0.0142829
Myt_cherry_idba_rep_c177|m.89799	Receptor-type guanylate cyclase Gyc76C {ECO:0000305};	Receptor-type guanylate cyclase Gyc76C {ECO:0000305};	2.19226	0.00433781	1.642	0.0143064
R1_Contig2688|m.86628	Nuclear factor NF-kappa-B p105 subunit;	Nuclear factor NF-kappa-B p105 subunit;	1.69299	0.0638428	-1.74673	0.0143195
R1_Contig4845	.	.	1.7959	0.0130135	1.54024	0.0143373
transcript-124_27740_75PE	.	.	2.87055	9.06021e-06	1.41798	0.0143613
transcript-124_31644_75PE	.	.	2.69966	0.000596752	-1.62449	0.0144061
R3_Contig49	.	.	2.11074	0.0445484	2.16134	0.0144308
transcript-124_51217_75PE	.	.	2.78321	0.000533882	1.75052	0.0144471
transcript-60_5631	.	.	3.24775	0.000116218	1.8699	0.01446
Myt_cherry_idba_rep_c337|m.89832	ATP synthase subunit g, mitochondrial;	ATP synthase subunit g, mitochondrial;	-2.63736	0.00021637	-1.61954	0.0146136
transcript-75_3124	.	.	2.17313	0.0196713	1.94641	0.0146163
Contig151|m.10566	BAH and coiled-coil domain-containing protein 1;	BAH and coiled-coil domain-containing protein 1;	2.63811	6.184e-07	1.23263	0.0146592
transcript-124_82299_75PE	.	.	3.4028	0.0209329	3.07864	0.0148016
R1_Contig3810	Transcription initiation factor TFIID subunit 12;	.	2.43865	0.000694945	1.54507	0.0148202
MinimusContig_437|m.962	Peptidyl-prolyl cis-trans isomerase CWC27 homolog;	Peptidyl-prolyl cis-trans isomerase CWC27 homolog;	-2.37555	0.0196936	-2.16407	0.0149378
Contig821|m.11394	.	.	3.46518	0.000164992	2.01433	0.0149733
transcript-124_9623_75PE|m.23647	Origin recognition complex subunit 2;	Origin recognition complex subunit 2;	1.64155	0.0158819	1.42005	0.0150146
transcript-124_6988_75PE|m.21250	.	.	-1.91857	0.0094184	-1.60558	0.0151346
Myt_cherry_idba_c2786	.	.	3.06931	8.05129e-09	1.25125	0.0153222
R1_Contig5415|m.87823	28S ribosomal protein S35, mitochondrial;	28S ribosomal protein S35, mitochondrial;	1.58953	0.099034	1.90441	0.015506
transcript-124_26559_75PE	.	.	1.34291	0.0289932	1.26322	0.0155691
R1_Contig2423	.	.	-1.77614	0.0500118	-1.84835	0.0156121
transcript-124_50643_75PE	.	.	1.76322	0.0974242	2.09905	0.0156521
transcript-124_23375_75PE|m.35992	Ras-related protein Rab-2;	Ras-related protein Rab-2;	2.37094	0.00224324	1.67193	0.0158199
transcript-124_84640_75PE	.	.	2.61578	0.017017	2.27726	0.0158199
transcript-124_25062_75PE|m.37513	DnaJ homolog subfamily A member 1;	.	-4.12925	2.16495e-05	-2.23258	0.0161291
transcript-124_13547_75PE	.	.	3.58352	2.85012e-09	1.36473	0.0163097
transcript-124_10299_LongLar8	.	.	3.76786	0.000439719	2.31008	0.0163482
R1_Contig1647|m.85954	ATP-dependent RNA helicase DDX54;	ATP-dependent RNA helicase DDX54;	2.44024	0.000618268	1.51457	0.0164663
Contig3042|m.13377	Peroxidasin homolog;	Peroxidasin homolog;	3.83675	1.14319e-07	1.5919	0.0165433
transcript-75_4446|m.93485	Leucine-rich repeat-containing protein 34;	Leucine-rich repeat-containing protein 34;	1.97226	0.0504079	2.02594	0.0165586
R1_Contig2969	.	.	3.76303	0.00725146	2.9421	0.0167513
R1_Contig7431	.	.	1.52683	0.0236407	1.38356	0.0167517
R1_Contig3186	.	.	1.79923	0.0674422	1.95522	0.0168143
Contig2713|m.13063	Serine/threonine-protein kinase PLK1;	Serine/threonine-protein kinase PLK1;	2.30162	0.00273556	1.60976	0.0168721
transcript-124_78981_75PE	.	.	2.05607	0.0540681	2.13466	0.0169288
transcript-124_8928_75PE|m.23051	Tolloid-like protein 1;	Bone morphogenetic protein 1 homolog;	2.38767	0.000953268	1.52082	0.0169378
transcript-124_25062_75PE|m.37512	DnaJ homolog subfamily A member 1;	DnaJ homolog subfamily A member 1;	-4.11525	2.33356e-05	-2.2172	0.0169448
transcript-124_19079_75PE|m.32470	TATA element modulatory factor;	TATA element modulatory factor;	-1.61174	0.0930797	-1.87767	0.0175858
Contig3063|m.13400	Zinc finger protein 398;	Hypermethylated in cancer 1 protein;	-1.41214	0.0555174	1.58521	0.01763
Contig3339|m.13613	F-box only protein 11;	F-box only protein 11;	1.99289	0.00410966	-1.3745	0.0180539
transcript-124_8429_75PE|m.22540	.	.	2.1104	0.00147891	1.39351	0.018108
Contig2953	.	.	1.27648	0.0759499	1.4049	0.0182485
transcript-124_10719_75PE|m.24728	Microfibrillar-associated protein 1 {ECO:0000250|UniProtKB:P55081};	Microfibrillar-associated protein 1 {ECO:0000250|UniProtKB:P55081};	2.22339	0.00273504	1.57365	0.0182789
transcript-124_14137_75PE|m.28036	.	.	1.78711	0.0531863	1.82699	0.0183922
R1_Contig3836|m.87187	Presenilin-1;	Presenilin-2;	2.02973	0.0178292	1.75031	0.0184174
MinimusContig_23	Lysosomal aspartic protease;	.	1.39309	0.037797	1.34163	0.0185963
MinimusContig_2620|m.5321	.	.	2.11403	0.00139443	1.40212	0.0186696
transcript-124_6493_75PE|m.20740	.	.	2.81805	0.00120191	-1.76637	0.018685
MinimusContig_2224	.	.	2.65992	4.69459e-06	1.21106	0.0186954
Contig2464	.	.	1.8894	0.000790715	1.20381	0.0188112
transcript-124_2526_75PE|m.16806	Myosin phosphatase Rho-interacting protein;	Myosin phosphatase Rho-interacting protein;	-3.1162	2.56472e-05	-1.68425	0.0188783
MinimusContig_190|m.436	Ubiquitin-like modifier-activating enzyme 1 {ECO:0000250|UniProtKB:Q02053};	Ubiquitin-like modifier-activating enzyme 1 {ECO:0000250|UniProtKB:Q02053};	1.38604	0.0395122	-1.27579	0.0190453
transcript-124_22103_75PE|m.34881	Inositol-trisphosphate 3-kinase B;	Inositol-trisphosphate 3-kinase B;	3.44243	7.89765e-06	1.63143	0.0190843
transcript-124_19235_75PE|m.32583	.	.	1.59761	0.0130753	1.29606	0.0193813
MinimusContig_4322	.	.	1.39734	0.073471	1.51673	0.019408
MinimusContig_2443|m.4942	WD repeat-containing protein 78;	WD repeat-containing protein 78;	3.05741	2.88286e-06	1.43902	0.0195063
transcript-124_11160_75PE|m.25211	Alpha-(1,3)-fucosyltransferase 11;	Alpha-(1,3)-fucosyltransferase 11;	-2.83918	0.0146548	-2.39805	0.0195433
transcript-124_41806_75PE	.	.	2.53396	0.0289637	2.30323	0.0198342
R1_Contig6299	.	.	1.35506	0.0241507	1.20451	0.0199319
MinimusContig_1298	Cytochrome c oxidase subunit 3;	.	1.3481	0.0710648	1.4434	0.0200246
transcript-124_30402_75PE	.	.	1.37061	0.0425553	1.33228	0.0200347
transcript-124_39542_75PE|m.48963	.	.	3.00796	0.0140993	2.47336	0.0201331
transcript-124_36249_75PE	.	.	1.88902	0.0292296	1.71278	0.0202076
transcript-124_2159_75PE|m.16440	.	.	2.30986	0.000559033	1.4109	0.0202812
MinimusContig_2495	.	.	3.47003	2.01389e-09	1.22954	0.0202915
R1_Contig8423	.	.	2.56698	0.000147222	1.39332	0.0203901
MinimusContig_4283	.	.	-1.40798	0.0291691	-1.31621	0.0205166
R1_Contig1749|m.86043	Protein DDI1 homolog 2;	Protein DDI1 homolog 2;	-1.57544	0.0884071	-1.77259	0.0205772
transcript-124_4405_75PE|m.18794	Tyrosine-protein kinase BAZ1B;	Tyrosine-protein kinase BAZ1B;	2.39645	0.0028662	1.66993	0.020644
transcript-124_3557_75PE|m.17920	Methionine--tRNA ligase, cytoplasmic;	Methionine--tRNA ligase, cytoplasmic;	2.62707	0.000296935	-1.45248	0.0208337
R1_Contig4931	.	.	2.10617	0.000386225	1.20459	0.0209143
Myt_cherry_idba_rep_c7116|m.91554	Methyltransferase-like protein 27 {ECO:0000312|HGNC:HGNC:19068};	Methyltransferase-like protein 27 {ECO:0000312|HGNC:HGNC:19068};	3.61839	0.00636592	2.69964	0.0209416
R1_Contig7338	.	.	1.38254	0.0357676	1.2916	0.0209484
Myt_cherry_idba_rep_c2068	.	.	2.53123	5.66316e-05	1.36342	0.0209599
R1_Contig8697|m.89767	NADH dehydrogenase [ubiquinone] 1 beta subcomplex subunit 2, mitochondrial;	NADH dehydrogenase [ubiquinone] 1 beta subcomplex subunit 2, mitochondrial;	3.54511	2.42214e-05	1.7875	0.0210026
R1_Contig3240	.	.	1.53361	0.0385595	-1.35862	0.0211511
transcript-124_57381_75PE	.	.	1.84234	0.0924451	-1.97003	0.0211649
R1_Contig4258	.	.	3.53894	6.55462e-06	1.64051	0.0211925
Myt_cherry_idba_c9201	.	.	3.88674	1.62826e-06	1.72602	0.0213329
R1_Contig4770|m.87567	Leucine-rich repeat and death domain-containing protein 1;	Leucine-rich repeat and death domain-containing protein 1;	2.17012	0.000621976	-1.23714	0.0213802
R1_Contig7906	.	.	-2.24669	0.0014584	-1.48605	0.0214028
R1_Contig7058	.	.	-1.31835	0.0908885	-1.48933	0.0215445
transcript-50_504|m.93371	Proteasome subunit alpha type-3;	Proteasome subunit alpha type-3;	4.77034	1.76906e-07	1.93179	0.0215697
MinimusContig_2128|m.4248	Kinesin-like protein KIF21A;	Kinesin-like protein KIF21A;	1.36584	0.0389764	1.29382	0.0216189
R2_Contig141|m.84617	Dynein heavy chain, cytoplasmic;	Dynein heavy chain, cytoplasmic;	4.55825	1.95293e-08	1.78564	0.0216551
transcript-124_11343_75PE|m.25377	ATP-binding cassette sub-family A member 5;	ATP-binding cassette sub-family A member 5;	1.78876	0.0129428	-1.32635	0.0220041
transcript-124_6573_75PE|m.20831	Rho guanine nucleotide exchange factor 39;	Rho guanine nucleotide exchange factor 39;	1.47422	0.017906	1.22608	0.022029
MinimusContig_1415|m.2280	Transposon TX1 uncharacterized 149 kDa protein;	.	1.59552	0.0423136	1.51942	0.0222095
transcript-124_67993_75PE	.	.	4.63872	7.48655e-11	1.55447	0.0224
transcript-124_27954_75PE	.	.	2.82733	9.60428e-05	1.48002	0.0224134
R1_Contig1212|m.85623	Cleft lip and palate transmembrane protein 1 homolog;	Cleft lip and palate transmembrane protein 1 homolog;	2.39014	0.00083454	-1.40209	0.0224889
R1_Contig7039|m.88915	Extracellular serine/threonine protein kinase four-jointed {ECO:0000305};	Extracellular serine/threonine protein kinase four-jointed {ECO:0000305};	2.42931	0.0159376	1.98569	0.022538
R1_Contig2384	.	.	1.67646	0.0352629	1.54864	0.0227831
MinimusContig_2756|m.5631	Nucleosome assembly protein 1-like 1;	Nucleosome assembly protein 1-like 4;	1.37415	0.0495782	1.34597	0.0228312
transcript-124_54879_75PE	.	.	2.49603	0.00104282	1.54453	0.0229084
Contig2616	.	.	1.86939	0.00297266	1.25683	0.0229283
transcript-124_27020_75PE|m.39111	BTB/POZ domain-containing protein kctd15;	BTB/POZ domain-containing protein kctd15;	1.74462	0.0436787	1.66246	0.0230034
transcript-124_34402_75PE	.	.	1.83323	0.0149436	1.47469	0.0232661
R1_Contig3020	.	.	-1.90162	0.0109848	-1.51436	0.0236157
transcript-124_15721_75PE	.	.	1.78758	0.0611154	1.80712	0.0236742
Myt_cherry_idba_rep_c3227|m.90330	Methyltransferase-like protein 27 {ECO:0000312|HGNC:HGNC:19068};	Methyltransferase-like protein 27 {ECO:0000312|HGNC:HGNC:19068};	3.31215	0.00896943	2.51367	0.0237207
transcript-124_27284_75PE	.	.	2.79443	0.000936519	1.69549	0.0238451
MinimusContig_1967|m.3905	Phosphoacetylglucosamine mutase {ECO:0000305};	Phosphoacetylglucosamine mutase {ECO:0000305};	3.76048	4.41171e-05	1.89147	0.0241247
R1_Contig1766|m.86054	.	.	2.52778	0.000386225	1.46029	0.0243018
Contig2729|m.13075	Tctex1 domain-containing protein 1;	Tctex1 domain-containing protein 1;	2.29521	0.0204281	1.92	0.0243207
MinimusContig_5276|m.9479	.	.	-1.48138	0.0268442	-1.30072	0.0245842
transcript-124_45611_75PE	.	.	2.22615	0.0262094	1.93003	0.0246224
R1_Contig7271|m.89070	Alpha-(1,3)-fucosyltransferase 7;	Alpha-(1,3)-fucosyltransferase 7;	2.88671	0.00092729	1.74244	0.0246624
Myt_cherry_idba_rep_c1258	.	.	2.523	0.0367179	2.30764	0.0247821
transcript-124_32601_75PE	.	.	2.2527	0.00341742	1.55493	0.0247821
MinimusContig_5357|m.9566	.	.	-1.48296	0.0272083	-1.30142	0.0248763
Contig3214|m.13506	Coiled-coil domain-containing protein 96;	Coiled-coil domain-containing protein 96;	-1.686	0.0279385	-1.48803	0.0248862
MinimusContig_634	.	.	2.82066	1.08517e-06	1.24519	0.0249372
transcript-124_38302_75PE	.	.	3.16935	1.7364e-06	1.42163	0.0249714
transcript-124_45861_75PE	.	.	2.3339	0.0338294	2.10257	0.0250039
transcript-124_48236_75PE|m.55538	.	.	1.95122	0.0711008	2.01689	0.0250039
MinimusContig_1510|m.2571	E3 ubiquitin-protein ligase UBR4;	E3 ubiquitin-protein ligase UBR4;	2.4334	0.000885284	1.45102	0.025114
transcript-124_57095_75PE	.	.	2.36788	0.0039258	1.61933	0.025114
transcript-124_59525_75PE	.	.	1.88715	0.0182729	1.55838	0.0251205
transcript-124_4622_75PE|m.19032	Cytochrome P450 26A1;	Cytochrome P450 26A1;	-3.68466	5.94402e-07	-1.63	0.0254386
MinimusContig_703	.	.	2.90088	6.83923e-05	1.46423	0.0256559
transcript-124_1493_75PE|m.15771	Talin-2;	Talin-2;	-1.57772	0.0238808	-1.37817	0.0256972
transcript-124_27071_75PE	.	.	1.38305	0.0896866	1.49966	0.0259053
transcript-124_55418_75PE|m.60726	.	.	3.79064	0.000162854	2.02797	0.0259302
transcript-124_11585_75PE|m.25600	.	.	2.13812	0.0103911	-1.51895	0.0261597
transcript-124_15903_75PE	.	.	1.82674	0.032153	1.61162	0.0266031
MinimusContig_5553	Transposon TX1 uncharacterized 149 kDa protein;	.	2.86024	0.00743114	2.0804	0.0267345
transcript-124_57715_75PE|m.62409	Perlucin-like protein {ECO:0000303|PubMed:21643827};	Collectin-12;	2.6693	0.0154452	2.11624	0.02677
transcript-124_29626_75PE	.	.	3.64946	1.20193e-05	1.68212	0.0267704
transcript-124_48798_75PE	.	.	2.68268	0.00987625	2.00822	0.0269417
R1_Contig827	.	.	1.66474	0.0640863	-1.57139	0.0273104
transcript-124_3741_75PE|m.18075	.	.	2.21252	0.000357319	1.22802	0.0273126
transcript-124_58640_75PE|m.63033	Trypsin-1;	Trypsin-1;	2.0546	0.00145273	1.29868	0.0277151
transcript-124_12193_75PE	.	.	1.87169	0.012801	-1.36338	0.0277829
transcript-124_5021_75PE	.	.	3.11487	2.07218e-06	1.35684	0.0279079
transcript-124_29276_75PE	.	.	-1.92846	0.0213444	-1.63605	0.0280696
R1_Contig2521	.	.	-1.85865	0.0393499	-1.71578	0.0281702
transcript-124_33671_75PE|m.44512	Ubiquitin carboxyl-terminal hydrolase 37;	Ubiquitin carboxyl-terminal hydrolase 37;	1.66423	0.0529342	1.59018	0.0283175
Myt_cherry_idba_rep_c6916|m.91498	Guanine nucleotide exchange C9orf72 {ECO:0000305};	Guanine nucleotide exchange C9orf72 {ECO:0000305};	1.96801	0.0157229	1.54441	0.0283802
transcript-124_41645_75PE	.	.	2.78807	0.00756881	2.00876	0.0285459
R1_Contig5473	.	.	3.91449	1.86713e-05	1.85502	0.0286067
R1_Contig5326	.	.	1.61616	0.0479797	-1.45123	0.0286171
transcript-124_24091_75PE	.	.	1.87977	0.00404179	1.2531	0.0287131
R1_Contig8243|m.89591	ADP-ribosylation factor-like protein 15;	ADP-ribosylation factor-like protein 15;	3.03052	0.00232188	1.94115	0.0289162
R2_Contig345	.	.	1.81881	0.00575336	1.25477	0.0290329
transcript-124_57640_75PE|m.62356	.	.	3.22962	6.00974e-05	1.63403	0.0294374
R1_Contig2563	.	.	1.5885	0.092471	-1.5952	0.0296836
transcript-124_26148_75PE	.	.	1.76651	0.0292651	1.50712	0.0297243
MinimusContig_3912|m.7678	Isocitrate dehydrogenase [NADP], mitochondrial;	Isocitrate dehydrogenase [NADP], mitochondrial;	5.57294	1.83137e-11	1.65869	0.0298113
MinimusContig_2002|m.3985	.	.	-2.33277	0.00130364	-1.46751	0.0299124
transcript-124_46608_75PE	.	.	2.41113	0.0030658	1.56592	0.0299735
MinimusContig_789	.	.	1.50126	0.0331468	1.31448	0.0300359
Contig1209|m.11797	Coiled-coil domain-containing protein 151;	Coiled-coil domain-containing protein 151;	2.40987	0.00912866	-1.71501	0.0301119
transcript-124_15396_75PE|m.29156	.	.	3.58513	0.000796077	2.09433	0.0301265
transcript-124_15297_75PE	.	.	2.1757	0.0171721	1.71532	0.0303481
Contig2914	Mitochondrial folate transporter/carrier;	.	3.09463	9.15417e-06	1.40832	0.0311307
transcript-124_70193_75PE|m.70737	Nesprin-1;	Nesprin-1;	3.0844	1.86647e-05	1.47347	0.0314215
transcript-75_14385|m.93506	COMM domain-containing protein 3;	COMM domain-containing protein 3;	2.77402	0.0442068	2.52329	0.0314566
MinimusContig_5188	.	.	2.4606	0.021166	1.98014	0.0317485
Contig906|m.11484	NADP-dependent malic enzyme;	NADP-dependent malic enzyme;	2.03688	0.0284062	-1.61693	0.0318035
transcript-124_78203_75PE	.	.	1.69172	0.0969889	1.80656	0.0318714
transcript-124_29434_75PE|m.41154	Spermatogenesis-associated serine-rich protein 2;	Spermatogenesis-associated serine-rich protein 2;	1.74653	0.0452377	-1.52145	0.0320241
transcript-124_9367_LongLar8	.	.	2.14879	0.0115678	1.603	0.0322887
Myt_cherry_idba_rep_c11033	.	.	2.28322	0.0207217	1.82604	0.0325007
Contig884|m.11465	Medium-chain specific acyl-CoA dehydrogenase, mitochondrial;	Medium-chain specific acyl-CoA dehydrogenase, mitochondrial;	2.57556	0.00651931	1.77484	0.0327606
MinimusContig_231	.	.	3.1877	2.29397e-06	1.30036	0.0328759
transcript-124_71017_75PE	.	.	2.33519	0.0169673	1.81442	0.0329845
R1_Contig5193	.	.	1.79308	0.00546154	1.21395	0.0332023
transcript-124_19395_75PE|m.32723	Neuronal acetylcholine receptor subunit alpha-7;	Neuronal acetylcholine receptor subunit alpha-7;	1.51346	0.0946596	1.59464	0.0333748
transcript-124_15239_75PE	.	.	1.94779	0.00188616	1.20356	0.0334832
transcript-124_23260_75PE|m.35882	.	.	1.74219	0.0432576	1.55522	0.0337401
R1_Contig1505|m.85854	Nuclear pore complex protein Nup88;	Nuclear pore complex protein Nup88;	-1.47288	0.0299504	-1.26753	0.0338059
transcript-50_1491	.	.	1.50488	0.0368626	1.30442	0.0338309
transcript-124_5330_75PE|m.19702	Regulator of G-protein signaling 14;	Regulator of G-protein signaling loco;	4.5989	6.78854e-09	1.61659	0.0339567
transcript-124_50751_75PE|m.57405	Ankyrin-3 {ECO:0000303|PubMed:7836469};	Ankyrin-3 {ECO:0000303|PubMed:7836469};	2.03241	0.0192396	1.59084	0.0340186
R1_Contig4885	.	.	3.25693	0.000984541	1.88277	0.0341262
MinimusContig_2863|m.5861	.	.	1.87167	0.0702488	1.83277	0.0341404
R1_Contig2091	.	.	2.02751	0.0295832	1.69325	0.0341763
transcript-124_3152_75PE|m.17458	Putative tyrosinase-like protein tyr-3;	Putative tyrosinase-like protein tyr-1;	-2.03029	0.00190545	-1.28566	0.0345701
transcript-124_1754_75PE	.	.	2.59852	0.00134162	1.5354	0.0347196
R1_Contig5588	.	.	1.66099	0.0460304	1.48925	0.0351124
transcript-124_11591_75PE|m.25603	.	.	3.43799	6.63747e-06	1.47646	0.0351485
Myt_cherry_idba_rep_c5887|m.91175	Protein disulfide-isomerase A5;	Protein disulfide-isomerase A5;	1.3416	0.0562388	-1.21144	0.0351948
Myt_cherry_idba_c4412|m.90677	Homeobox protein cut-like 1;	Homeobox protein cut-like 1;	2.11481	0.00900807	1.49553	0.035444
R1_Contig1874|m.86137	Neuronal acetylcholine receptor subunit alpha-3;	Neuronal acetylcholine receptor subunit alpha-3;	2.81268	6.71502e-05	1.37106	0.0354594
Contig496|m.11043	.	.	1.4002	0.0459093	1.25296	0.0355266
transcript-124_44888_75PE	.	.	1.82158	0.0451914	1.6256	0.0355964
transcript-124_10893_75PE|m.24928	Lactase-phlorizin hydrolase;	Lactase-phlorizin hydrolase;	2.21941	0.00611313	1.49024	0.0360981
transcript-124_13356_75PE|m.27357	Protein FAM210A;	Protein FAM210A;	1.88567	0.0125963	1.37668	0.0361721
MinimusContig_3111	.	.	-3.39688	2.91505e-07	-1.4447	0.0362087
Contig3219|m.13516	ATP synthase subunit beta, mitochondrial;	ATP synthase subunit beta, mitochondrial;	3.86751	6.22111e-09	1.35454	0.0362326
transcript-124_38697_75PE	.	.	1.91683	0.00605638	1.27935	0.0362443
Contig2942|m.13286	Zinc transporter ZIP12;	Zinc transporter ZIP12;	-1.93283	0.0109226	-1.43194	0.0379544
MinimusContig_4268	.	.	2.37509	0.00048587	1.2574	0.0379544
transcript-124_45759_75PE|m.53616	.	.	1.61526	0.0217021	1.25934	0.0381046
transcript-124_59834_75PE	.	.	1.70569	0.0119733	1.24929	0.0381696
MinimusContig_1289|m.1839	Sortilin;	Sortilin;	-1.37023	0.0573534	-1.29433	0.0382343
Myt_cherry_idba_rep_c8839|m.92070	.	.	1.54308	0.0443992	1.35303	0.0383322
R1_Contig3911	.	.	3.38199	3.2729e-06	1.41937	0.038596
R2_Contig431|m.84796	Tubulin alpha-3 chain;	Tubulin alpha-1C chain;	1.31276	0.071471	1.26686	0.0386926
MinimusContig_3388|m.6806	.	.	3.50429	2.78643e-05	1.63323	0.0387592
transcript-124_70851_75PE	.	.	3.64611	8.72649e-06	1.58162	0.0392444
MinimusContig_3047|m.6219	.	.	3.4546	1.98245e-07	1.25438	0.0395015
MinimusContig_4966|m.9160	Mitotic spindle-associated MMXD complex subunit MIP18;	Mitotic spindle-associated MMXD complex subunit MIP18;	2.62897	0.0343891	2.19281	0.0404414
transcript-124_35898_75PE|m.46200	N-acetylneuraminate lyase;	N-acetylneuraminate lyase;	2.43371	0.00458154	1.55521	0.0417436
MinimusContig_4539	.	.	2.34371	0.064181	2.17357	0.0418427
Contig518|m.11060	Uncharacterized protein C2orf81 homolog;	Uncharacterized protein C2orf81 homolog;	3.95294	2.09167e-06	1.60724	0.0420868
R1_Contig7843	.	.	2.05919	0.00584436	-1.24854	0.0421123
transcript-124_33817_75PE	.	.	2.03752	0.0326753	1.66484	0.0421865
Contig2990	.	.	1.9661	0.0122453	1.39536	0.0423198
R1_Contig6954	Histone-lysine N-methyltransferase 2A;	.	-1.46814	0.0787733	-1.44342	0.0423488
transcript-124_37717_75PE	.	.	2.87552	1.8662e-05	1.23295	0.0425685
MinimusContig_4831	.	.	2.42759	0.00174908	1.41443	0.0426575
R2_Contig422|m.84784	Tyrosyl-DNA phosphodiesterase 1;	Tyrosyl-DNA phosphodiesterase 1;	1.67011	0.0195404	1.24983	0.0432244
transcript-124_33278_75PE|m.44192	.	A-kinase anchor protein 10, mitochondrial;	2.35713	0.0128234	1.67372	0.0432593
MinimusContig_30	.	.	1.85204	0.0144525	1.3294	0.0433788
transcript-124_26752_75PE	.	.	3.00844	1.43854e-05	1.27482	0.0433834
transcript-124_16655_75PE|m.30271	.	.	2.17769	0.00672401	1.43051	0.0433982
transcript-124_12904_LongLar8	.	.	-2.25931	0.0213003	-1.76501	0.0434177
Myt_cherry_idba_c7160|m.91573	Ribonuclease H2 subunit B;	Ribonuclease H2 subunit B;	-1.5584	0.0367179	-1.31941	0.0437377
transcript-124_33733_75PE	.	.	3.24516	0.00126774	1.82609	0.0437751
R1_Contig4037|m.87296	Glutamine synthetase;	Glutamine synthetase;	2.20545	0.00762952	1.46374	0.0441899
MinimusContig_3564|m.7123	.	.	-1.58112	0.0193978	-1.20527	0.044312
Contig539|m.11079	Protein held out wings;	Protein quaking-A;	-1.91587	0.0700133	-1.81492	0.0444262
MinimusContig_1305	.	.	-2.71014	0.000982321	-1.54532	0.0446575
MinimusContig_5976	.	.	-3.44531	9.62824e-07	-1.39683	0.0447129
R1_Contig2728	.	.	2.35109	0.0394258	1.96742	0.0447536
MinimusContig_22|m.47	Heterogeneous nuclear ribonucleoprotein U-like protein 1;	Heterogeneous nuclear ribonucleoprotein U-like protein 1;	1.31654	0.0707979	1.2342	0.0448737
transcript-124_45116_75PE	.	.	3.00263	0.00210505	1.75264	0.0452907
transcript-124_5908_75PE|m.20248	Cilia- and flagella-associated protein 206 {ECO:0000305};	Cilia- and flagella-associated protein 206 {ECO:0000305};	1.62201	0.0230807	1.24127	0.0457463
transcript-124_50268_75PE	.	.	2.94475	0.00603804	1.90039	0.0457581
MinimusContig_5942	.	.	2.03335	0.038925	1.68443	0.0458558
R1_Contig7773	.	.	1.36215	0.061226	1.2251	0.0461001
MinimusContig_4712	.	.	2.48472	0.00280815	1.49403	0.0463427
R1_Contig6086	.	.	3.44503	0.00130647	1.91812	0.0473516
transcript-124_11190_75PE|m.25237	Proprotein convertase subtilisin/kexin type 6;	Proprotein convertase subtilisin/kexin type 6;	-2.14512	0.00336451	-1.36208	0.0484061
R1_Contig4067|m.87316	.	.	2.76452	0.0431957	2.31314	0.0484632
transcript-124_3739_75PE|m.18073	Importin-5;	Importin-5;	1.75035	0.0207232	-1.24622	0.0486643
transcript-124_83704_75PE|m.78976	.	.	3.32116	0.0203556	2.4599	0.0493238
transcript-124_7079_75PE	.	.	1.46513	0.0659634	1.3204	0.0495876
transcript-124_89584_75PE	.	.	2.39795	0.0824348	2.27163	0.0498622
transcript-124_17820_75PE|m.31352	DnaJ homolog subfamily C member 5B;	DnaJ homolog subfamily C member 5B;	2.05314	0.00649006	1.30861	0.0498767
transcript-124_47499_75PE|m.54958	.	.	1.62711	0.0427786	1.34528	0.0504272
transcript-124_39996_75PE|m.49260	.	.	2.73462	0.00635725	1.74631	0.0515026
R1_Contig3798	.	.	2.395	0.00514278	-1.42013	0.0518436
transcript-124_38093_75PE|m.47917	Myosin regulatory light chain 2, smooth muscle minor isoform;	Myosin regulatory light chain 2, smooth muscle minor isoform;	3.34804	0.00947124	2.23106	0.0521622
transcript-124_80335_75PE	.	.	-3.66891	7.07295e-05	-1.77338	0.0521622
transcript-124_25154_75PE|m.37612	High affinity cGMP-specific 3',5'-cyclic phosphodiesterase 9A {ECO:0000305};	High affinity cGMP-specific 3',5'-cyclic phosphodiesterase 9A {ECO:0000305};	2.17131	0.00624082	1.36174	0.0524985
R1_Contig1602|m.85926	Flavin reductase (NADPH);	Flavin reductase (NADPH);	1.55835	0.051926	1.32171	0.0528543
MinimusContig_772|m.1460	Cilia- and flagella-associated protein 77 {ECO:0000305};	Cilia- and flagella-associated protein 77 {ECO:0000305};	1.73167	0.0700133	1.55997	0.0530575
R1_Contig4374|m.87425	Calcium uptake protein 1 homolog, mitochondrial;	Calcium uptake protein 1, mitochondrial;	1.62329	0.0352604	-1.20047	0.0531391
transcript-124_5328_75PE|m.19700	Cytosolic carboxypeptidase-like protein 5;	.	-3.39244	0.000351403	-1.75968	0.0537474
R1_Contig6122	.	.	-1.89115	0.0157991	-1.36977	0.0539488
MinimusContig_4197	.	.	2.00814	0.0161106	1.40834	0.0540013
transcript-124_27895_75PE	.	.	2.23122	0.00479247	1.37359	0.0540442
transcript-124_32203_75PE	.	.	2.58932	0.00493002	1.5826	0.0540731
transcript-124_5082_75PE|m.19434	NADH dehydrogenase [ubiquinone] iron-sulfur protein 8, mitochondrial;	NADH dehydrogenase [ubiquinone] iron-sulfur protein 8, mitochondrial;	2.01952	0.0829264	-1.81571	0.0541926
Myt_cherry_idba_rep_c2448	.	.	1.93725	0.0347533	1.52112	0.0542478
transcript-124_39760_75PE|m.49096	Coiled-coil domain-containing protein 189;	Coiled-coil domain-containing protein 189;	2.64091	0.0158236	1.83866	0.0553149
transcript-124_16493_75PE	.	.	2.77941	0.000147505	1.30867	0.0553393
transcript-124_40008_75PE	.	.	2.63238	0.00128796	1.41225	0.0554096
transcript-124_60330_75PE|m.64244	Hematopoietic prostaglandin D synthase;	Hematopoietic prostaglandin D synthase;	-3.53628	2.54625e-05	-1.56592	0.055416
Myt_cherry_idba_rep_c7489|m.91721	Actin-like protein 6B;	Actin-like protein 6B;	1.51758	0.0845442	-1.32782	0.0555956
transcript-124_43775_75PE|m.52217	.	.	-1.85065	0.0795802	-1.7227	0.0558344
MinimusContig_3728|m.7415	.	.	2.47381	0.0039258	1.45916	0.055999
R1_Contig1113	Acyl-CoA-binding protein;	.	1.4174	0.0768509	1.29426	0.0560578
R1_Contig4795	.	.	3.09769	0.000102912	1.42476	0.0561573
Myt_cherry_idba_rep_c13948	.	.	-1.5534	0.0979177	-1.51059	0.0563362
R1_Contig5845|m.88003	EF-hand calcium-binding domain-containing protein 6;	EF-hand calcium-binding domain-containing protein 6;	3.54887	6.97781e-07	1.30144	0.0564173
transcript-124_49885_75PE|m.56774	Titin;	Titin;	-1.95018	0.0401836	-1.59506	0.0566773
R1_Contig3093|m.86811	.	.	1.94438	0.0914533	-1.75822	0.0571046
transcript-124_26656_75PE|m.38822	Triple functional domain protein;	Triple functional domain protein;	1.9915	0.0236407	1.4705	0.0577774
transcript-124_30218_75PE	.	.	2.66137	0.00117374	1.40973	0.0578581
transcript-124_9522_75PE	.	.	1.43771	0.0743856	-1.20338	0.0581991
R1_Contig1296|m.85691	Histone H1, gonadal;	Protein B4;	-1.471	0.0595724	-1.26772	0.0584254
transcript-124_9521_75PE|m.23567	Next to BRCA1 gene 1 protein;	Next to BRCA1 gene 1 protein;	4.63297	4.47607e-07	1.64195	0.0591265
MinimusContig_5800	.	.	2.67682	0.00257435	1.50771	0.0592043
R1_Contig7258|m.89062	Inward rectifier potassium channel 2;	ATP-sensitive inward rectifier potassium channel 12;	-2.05267	0.00471204	-1.29237	0.059481
transcript-124_46870_75PE|m.54430	Uncharacterized protein C1orf158 homolog;	Uncharacterized protein C1orf158 homolog;	3.47867	6.72579e-06	1.34524	0.0595285
transcript-124_58629_75PE|m.63030	.	.	-1.3573	0.0802027	-1.23948	0.059792
transcript-124_6886_75PE|m.21131	Forkhead box protein N3;	Forkhead box protein N3;	2.14862	0.00613515	1.31563	0.0600058
Myt_cherry_idba_rep_c1431|m.90036	.	.	2.34944	0.00572223	1.41738	0.0604153
transcript-124_39663_75PE	.	.	2.00508	0.0322497	-1.44523	0.0605064
transcript-124_77454_75PE	.	.	2.24389	0.0508303	-1.78257	0.0606386
Myt_cherry_idba_c8111|m.91900	Nuclear factor 1 X-type;	Nuclear factor 1 X-type;	2.44832	0.0229404	-1.70372	0.0609409
transcript-124_15160_75PE|m.28986	Cadherin-99C {ECO:0000303|PubMed:15708564};	Cadherin-99C {ECO:0000303|PubMed:15708564};	1.85262	0.0235286	1.33663	0.0609438
MinimusContig_5313	.	.	1.7182	0.0197192	1.20285	0.0612319
transcript-124_11565_75PE|m.25581	von Willebrand factor D and EGF domain-containing protein;	von Willebrand factor D and EGF domain-containing protein;	-1.94332	0.00563149	-1.23128	0.0613378
transcript-124_88620_75PE	.	.	3.47221	6.00974e-05	1.49971	0.0614893
MinimusContig_3574|m.7137	Dynein assembly factor 4, axonemal {ECO:0000250|UniProtKB:Q8WXU2};	Dynein assembly factor 4, axonemal {ECO:0000250|UniProtKB:Q8WXU2};	3.06647	0.000216816	-1.37072	0.0615014
transcript-124_69822_75PE|m.70496	Hepatic lectin;	Hepatic lectin;	3.01493	0.0125395	1.99902	0.0615014
transcript-124_31838_75PE	.	.	-2.00119	0.0225939	-1.48181	0.0616212
R1_Contig1755	Migration and invasion enhancer 1;	.	3.12201	0.000734556	-1.52373	0.0617218
Myt_cherry_idba_c6400	.	.	2.3277	0.00300526	1.31277	0.0622024
Myt_cherry_idba_c5733	.	.	3.17987	6.55809e-06	1.21848	0.0625344
R1_Contig1742|m.86033	.	.	3.07467	0.0503545	2.51073	0.0627105
transcript-124_76120_75PE	.	.	1.76352	0.0391462	1.37263	0.063069
MinimusContig_1434|m.2354	Maternal B9.10 protein;	.	4.55923	0.00011628	2.04763	0.0631225
R1_Contig2722	.	.	2.39424	0.00389299	1.37379	0.0631225
transcript-124_15584_75PE|m.29320	Heat shock protein 75 kDa, mitochondrial;	Heat shock protein 75 kDa, mitochondrial;	2.53578	0.000545362	1.24616	0.0631225
Contig85_capround1|m.10456	.	.	1.95856	0.0705888	1.70294	0.0633775
transcript-124_13436_75PE|m.27434	.	.	1.87327	0.0180362	1.28296	0.063488
Contig3494|m.13734	Inositol-trisphosphate 3-kinase C;	Inositol-trisphosphate 3-kinase C;	2.1588	0.00323134	1.21063	0.0635573
Myt_cherry_idba_rep_c1531	.	.	-2.65703	0.00317314	-1.57481	0.0637366
transcript-124_29371_75PE	.	.	1.84679	0.0462575	-1.40783	0.0638573
Contig3012|m.13351	60S ribosomal protein L30;	60S ribosomal protein L30;	1.71301	0.0241288	1.24228	0.06405
transcript-124_1844_75PE|m.16077	Rac GTPase-activating protein 1;	Rac GTPase-activating protein 1;	2.5999	0.000308894	1.20234	0.0640817
R1_Contig5292	.	.	2.55566	0.0012703	1.35236	0.0642466
Contig2659	.	.	3.51911	3.21432e-06	1.28712	0.0645597
MinimusContig_4093|m.7995	OTU domain-containing protein 6B;	OTU domain-containing protein 6B;	-3.16703	0.00988132	-2.0684	0.0653931
Myt_cherry_idba_rep_c6629|m.91398	Neuronal acetylcholine receptor subunit alpha-3;	Neuronal acetylcholine receptor subunit alpha-3;	1.39921	0.0822751	1.25003	0.0655211
transcript-124_68491_75PE	.	.	4.25792	1.78716e-07	1.45279	0.0658198
transcript-124_82134_75PE	.	.	-1.87177	0.0205827	-1.318	0.0670896
transcript-124_46154_75PE	.	.	3.07162	0.00933943	1.92313	0.0672706
transcript-124_53268_75PE|m.59254	.	.	-2.74764	0.0152107	-1.88786	0.0672706
transcript-124_31029_75PE|m.42473	WD repeat-containing protein 41 {ECO:0000305};	WD repeat-containing protein 41 {ECO:0000305};	1.64404	0.0891707	1.48049	0.0686227
R1_Contig3709|m.87117	.	.	4.60445	1.56448e-10	1.27709	0.0686525
MinimusContig_37|m.69	WD repeat-containing protein 63;	WD repeat-containing protein 63;	2.51172	0.00232188	1.34707	0.0688504
transcript-124_13838_75PE|m.27844	.	.	3.16952	0.0320246	2.33931	0.0690899
transcript-124_82169_75PE	.	.	-2.50437	0.00196143	-1.38158	0.0696449
R2_Contig236|m.84689	Serine--tRNA ligase, mitochondrial;	Serine--tRNA ligase, mitochondrial;	1.85763	0.0513881	1.48057	0.0697289
transcript-55_11316	.	.	1.83987	0.0255913	1.30531	0.0697602
R1_Contig6546	.	.	2.72501	0.000256075	1.2558	0.0708066
R1_Contig1020	.	.	2.62284	0.00139443	1.33267	0.0715744
MinimusContig_4721	.	.	1.55623	0.0919091	1.39586	0.0718672
MinimusContig_4304	.	.	3.02499	4.15405e-05	1.23556	0.0720078
transcript-124_42256_75PE|m.51036	Protein CMSS1;	Protein CMSS1;	2.41781	0.00781816	-1.38632	0.0732503
MinimusContig_88	.	.	-2.22431	0.00228443	-1.22333	0.073875
MinimusContig_3062|m.6232	Transcriptional adapter 2-alpha;	Transcriptional adapter 2-alpha;	1.78943	0.0250305	1.24224	0.0741366
Myt_cherry_idba_rep_c7264|m.91618	.	.	-1.59174	0.0916677	-1.42705	0.0742753
Myt_cherry_idba_c1551|m.90070	cAMP-responsive element-binding protein-like 2;	cAMP-responsive element-binding protein-like 2;	2.26269	0.0250365	1.57327	0.0742965
R1_Contig4068|m.87318	.	.	4.28475	0.00275096	2.3317	0.0746657
Contig2428	.	.	2.51066	0.000950877	-1.20448	0.0746865
transcript-124_24315_75PE|m.36843	.	.	1.97511	0.0214223	1.33709	0.0749444
transcript-124_9279_75PE	.	.	1.78023	0.0290833	1.26104	0.0750721
transcript-124_33523_75PE	.	.	-1.83774	0.0162834	-1.2336	0.0750897
Myt_cherry_idba_rep_c14489	.	.	2.04464	0.0292036	1.45391	0.0754393
R1_Contig3888	.	.	3.89512	6.12238e-07	-1.2738	0.0755662
R1_Contig1310|m.85703	Myophilin;	Myophilin;	-4.48795	2.54638e-06	-1.70687	0.0783214
Contig1518	.	.	2.1821	0.00583009	-1.20322	0.0784504
transcript-124_42040_75PE	.	.	2.22203	0.0194581	1.473	0.0784849
Myt_cherry_idba_rep_c9838	.	.	2.9314	0.000634862	1.38181	0.0785971
transcript-124_4906_75PE|m.19287	Protein OS-9;	Protein OS-9;	-1.88337	0.0174487	-1.26551	0.0788169
transcript-124_23496_75PE|m.36147	Probable 39S ribosomal protein L45, mitochondrial;	Probable 39S ribosomal protein L45, mitochondrial;	-2.7608	0.00258287	1.58764	0.0794653
transcript-124_35151_75PE	.	.	2.14575	0.0706624	1.77475	0.0796673
transcript-124_31422_75PE|m.42778	Membrane-associated progesterone receptor component 2;	Membrane-associated progesterone receptor component 2;	3.45077	0.000388313	1.56277	0.0800095
R1_Contig7084	.	.	3.07413	0.000124906	1.29268	0.0802979
R1_Contig6640|m.88578	Heat shock protein 70 B2;	Heat shock protein 70 B2;	-3.18301	4.40469e-05	-1.35586	0.0804433
R1_Contig8000	.	.	3.71254	2.50683e-06	1.28067	0.0805788
transcript-124_63420_75PE	.	.	2.77466	0.0035554	-1.44598	0.0809708
transcript-124_39760_75PE|m.49097	Coiled-coil domain-containing protein 189;	.	2.74688	0.0269008	1.89208	0.0819856
R1_Contig6278|m.88315	NADH dehydrogenase [ubiquinone] 1 alpha subcomplex subunit 10, mitochondrial;	NADH dehydrogenase [ubiquinone] 1 alpha subcomplex subunit 10, mitochondrial;	3.96607	1.0992e-06	1.32784	0.0820005
Myt_cherry_idba_rep_c3950|m.90517	Betaine--homocysteine S-methyltransferase 1;	Betaine--homocysteine S-methyltransferase 1;	-2.18857	0.037687	-1.6338	0.0828789
transcript-124_39013_75PE	.	.	2.62718	0.000892386	1.23868	0.0839117
transcript-124_87392_75PE|m.81150	.	.	1.6643	0.0914473	1.43682	0.0839117
Contig2355	.	.	2.31145	0.00762952	1.33183	0.0842481
MinimusContig_1845|m.3663	.	.	-1.96662	0.0597687	-1.56478	0.0855361
transcript-124_10076_75PE|m.24076	Hyccin;	Hyccin;	2.43679	0.00394523	1.30501	0.0855611
transcript-124_12392_75PE|m.26357	.	.	3.65821	4.64299e-06	1.33868	0.0857842
Contig724	.	.	1.52683	0.0667241	1.22727	0.0868643
transcript-124_21960_75PE|m.34763	Cyclic AMP-responsive element-binding protein 3-like protein 2;	Cyclic AMP-responsive element-binding protein 3-like protein 2;	2.26015	0.00346667	1.22362	0.0869698
transcript-124_3690_75PE	DNA replication licensing factor MCM2;	.	2.60604	0.00450463	1.41345	0.0881358
R2_Contig471|m.84818	Serine/arginine-rich splicing factor 4;	Serine/arginine-rich splicing factor 4;	2.22666	0.0524942	-1.63368	0.0882277
transcript-124_92182_75PE	.	.	-2.88062	0.000973794	-1.40795	0.0900633
transcript-124_11443_75PE|m.25470	Zinc finger protein 609;	Zinc finger protein 609;	1.94628	0.0381195	1.39092	0.0913154
transcript-124_58199_75PE|m.62712	Fibronectin;	Fibronectin;	2.06223	0.0795205	1.68864	0.0915274
R1_Contig1502	.	.	1.76799	0.0391022	1.25096	0.0923227
transcript-124_73434_75PE|m.72788	.	.	-3.44539	0.00315929	-1.83527	0.0929127
MinimusContig_1097	.	.	2.03266	0.0500118	1.50912	0.0931619
Myt_cherry_idba_rep_c4991|m.90853	.	.	-1.85983	0.0526109	-1.43097	0.0935195
transcript-124_87137_75PE	.	.	2.29035	0.0210592	1.48355	0.093643
R1_Contig269	.	.	1.71693	0.0604794	1.31629	0.0937312
transcript-124_33571_75PE	.	.	4.28694	2.16667e-08	1.21	0.0944522
R1_Contig4056|m.87305	MICAL-like protein 2;	MICAL-like protein 2;	-2.26782	0.0091998	-1.35049	0.0946278
R1_Contig3231|m.86885	Acyl carrier protein, mitochondrial;	Acyl carrier protein, mitochondrial;	1.83058	0.0989392	1.55502	0.096487
MinimusContig_5644	H/ACA ribonucleoprotein complex subunit 3;	.	-1.82885	0.0457241	-1.34886	0.0968532
transcript-124_47261_75PE	Sodium- and chloride-dependent glycine transporter 2;	.	3.35371	0.00024766	1.40415	0.0974062
transcript-124_46518_75PE|m.54133	Liprin-beta-1;	Liprin-beta-1;	1.86163	0.0522524	1.37495	0.0976061
transcript-124_53486_75PE	.	.	3.33275	0.000361162	1.4248	0.0976196
transcript-124_53256_75PE|m.59241	Protein canopy homolog 3;	Protein canopy homolog 3;	2.36758	0.0637822	-1.76076	0.0983319
transcript-124_61510_75PE	.	.	1.9949	0.0526551	-1.408	0.0987629
MinimusContig_5782	.	.	3.71554	8.17573e-06	1.28324	0.0988741
transcript-124_32129_75PE	.	.	2.46851	0.0111139	1.44121	0.0988856
