# Supplementary material for: Single-Larva RNA Sequencing Identifies Markers of Copper Toxicity and Exposure in Early Mytilus californianus Larvae
Source: Front Physiol. 2021 Dec 9;12:647482. doi: 10.3389/fphys.2021.647482 (PMC8696127; doi:10.3389/fphys.2021.647482)
Supplement: Supplementary file 5 [file Table_5.XLSX]

## Sheet: Effect_bbmap_OR_Table_logfc1.2
Table S5--Markers of Effect in single larval samples at 3 and 6 ug/L copper. Genes that were DE between normal and abnormal animals at 3 ug/L copper and 6 ug/L were identified.
Transcript Annotation			Differential expression between normal and abnormal animals at 3 ug/L copper		Differential expression between normal and abnormal animals at 6 ug/L copper
Contig name	Blastx against Uniprot	Blastp against Uniprot	log2FoldChange	Adjusted p-value	log2FoldChange	Adjusted p-value
MinimusContig_988|m.1691	.	.	-6.9726	2.24661e-07	NA	NA
transcript-124_58315_75PE	.	.	-6.91598	2.16385e-09	NA	NA
R1_Contig6126|m.88218	Coiled-coil domain-containing protein 42 homolog {ECO:0000305};	Coiled-coil domain-containing protein 42 homolog {ECO:0000305};	-6.79666	1.18881e-08	NA	NA
transcript-124_69292_75PE|m.70129	.	.	-5.76482	0.000250402	NA	NA
Myt_cherry_idba_c8033	.	.	-5.47147	3.63846e-07	NA	NA
R1_Contig5429|m.87832	Anamorsin homolog {ECO:0000255|HAMAP-Rule:MF_03115};	Anamorsin homolog {ECO:0000255|HAMAP-Rule:MF_03115};	-5.30089	0.00126619	2.9015	0.0584852
R1_Contig4203|m.87365	Endoplasmic reticulum-Golgi intermediate compartment protein 2;	Endoplasmic reticulum-Golgi intermediate compartment protein 2;	-5.22937	0.000118321	NA	NA
transcript-124_83652_75PE	.	.	-5.20838	0.0367848	NA	NA
R1_Contig5295	.	.	-5.17135	0.000688278	NA	NA
Myt_cherry_idba_rep_c7264|m.91618	.	.	-5.14145	1.4265e-05	NA	NA
transcript-124_39927_75PE|m.49215	.	.	-5.06696	0.000179883	NA	NA
transcript-124_4799_75PE|m.19185	Pyridoxal-dependent decarboxylase domain-containing protein 1;	Pyridoxal-dependent decarboxylase domain-containing protein 1;	-4.99334	1.09663e-06	NA	NA
transcript-124_15062_75PE|m.28867	Cilia- and flagella-associated protein 100 {ECO:0000305};	Cilia- and flagella-associated protein 100 {ECO:0000305};	-4.89357	4.25934e-06	NA	NA
R3_Contig38|m.84510	Protein SET;	Protein SET;	-4.88578	1.27306e-05	NA	NA
transcript-124_52229_75PE	.	.	-4.76112	0.00662364	NA	NA
transcript-124_60330_75PE|m.64244	Hematopoietic prostaglandin D synthase;	Hematopoietic prostaglandin D synthase;	-4.75226	6.0046e-05	2.21477	0.0498025
transcript-124_20100_75PE	.	.	-4.72079	8.00815e-06	1.80279	0.0814068
Contig267|m.10728	Ecto-NOX disulfide-thiol exchanger 1;	Ecto-NOX disulfide-thiol exchanger 1;	-4.70142	9.77248e-06	NA	NA																transcript-124_20100_75PE
MinimusContig_6162	.	.	-4.6836	4.32872e-07	NA	NA																Contig309|m.10782
R1_Contig5350	.	.	-4.68342	0.000300395	NA	NA																R1_Contig8126
MinimusContig_3989	.	.	-4.62495	2.42559e-08	NA	NA																R1_Contig4355
transcript-124_80158_75PE	.	.	-4.62224	0.00728944	NA	NA																Myt_cherry_idba_rep_c4615|m.90739
transcript-124_34718_75PE	.	.	-4.5934	0.000523287	NA	NA																R2_Contig374|m.84756
Contig309|m.10782	Protein regulator of cytokinesis 1 {ECO:0000312|MGI:MGI:1858961};	.	-4.58184	0.0159618	-3.92816	0.0121284
R1_Contig8125|m.89503	ATPase inhibitor mai-2, mitochondrial;	ATPase inhibitor, mitochondrial;	-4.56533	0.0107924	NA	NA																Contig2702
Contig3338|m.13612	Programmed cell death 6-interacting protein;	Programmed cell death 6-interacting protein;	-4.56363	7.07504e-07	NA	NA																transcript-124_14286_75PE
transcript-124_13195_75PE|m.27178	Scaffold attachment factor B1;	Scaffold attachment factor B1;	-4.55378	0.000220767	NA	NA																transcript-124_11160_75PE|m.25211
R1_Contig8126	ATPase inhibitor mai-2, mitochondrial;	.	-4.53105	0.00409426	2.87035	0.031713
R1_Contig4355	.	.	-4.53021	2.5109e-05	1.84266	0.0674604
transcript-124_39929_75PE|m.49219	.	.	-4.47851	0.00112983	NA	NA																R1_Contig1953|m.86192
Contig325|m.10806	PHD finger protein 19;	PHD finger protein 19;	-4.46928	0.0345897	NA	NA																MinimusContig_616|m.1271
R1_Contig7293|m.89088	Alcohol dehydrogenase class-3 chain H;	Alcohol dehydrogenase class-3 chain H;	-4.42975	0.00050632	NA	NA																transcript-124_13493_75PE|m.27496
Contig2478|m.12855	Serine/threonine-protein kinase TAO1-B;	Serine/threonine-protein kinase TAO1;	-4.41078	0.000354849	NA	NA																R1_Contig7138|m.88975
transcript-124_23183_75PE|m.35830	Nucleoprotein TPR;	Nucleoprotein TPR;	-4.38718	0.000122577	NA	NA																MinimusContig_2782|m.5681
Myt_cherry_idba_rep_c6774|m.91441	Down syndrome cell adhesion molecule homolog;	Down syndrome cell adhesion molecule homolog;	-4.37282	0.000152332	NA	NA																R2_Contig125|m.84603
transcript-124_35131_75PE	.	.	-4.35423	0.00105413	NA	NA																transcript-124_24141_75PE
transcript-124_57897_75PE|m.62531	.	.	-4.31184	0.000103105	NA	NA																transcript-124_55369_75PE
transcript-124_18518_75PE	.	.	-4.28259	0.00298198	NA	NA																transcript-124_7596_75PE|m.21764
transcript-124_3242_75PE|m.17548	.	.	-4.26945	0.00336506	NA	NA																MinimusContig_1534|m.2673
R1_Contig2146	.	.	-4.24482	0.000221828	NA	NA																R1_Contig6139
Myt_cherry_idba_rep_c4615|m.90739	Prefoldin subunit 4;	Prefoldin subunit 4;	-4.24445	0.00600544	2.78385	0.0395372
transcript-124_54898_75PE	.	.	-4.22839	0.000770277	NA	NA																Myt_cherry_idba_rep_c1672
transcript-124_6919_LongLar8	.	.	-4.2174	0.00692065	NA	NA																MinimusContig_2530|m.5128
MinimusContig_4093|m.7995	OTU domain-containing protein 6B;	OTU domain-containing protein 6B;	-4.20967	0.0145683	NA	NA																transcript-124_67715_75PE|m.69173
transcript-124_57068_75PE	Ragulator complex protein LAMTOR4;	.	-4.20781	0.0558877	NA	NA																transcript-124_1259_75PE|m.15566
transcript-124_56934_75PE|m.61842	DNA-directed RNA polymerases I, II, and III subunit RPABC2;	DNA-directed RNA polymerases I, II, and III subunit RPABC2;	-4.20712	0.000301293	NA	NA																transcript-124_14674_75PE
R2_Contig374|m.84756	Uncharacterized ABC transporter ATP-binding protein C29A3.09c;	ATP-binding cassette sub-family F member 3;	-4.173	0.000300395	-1.90094	0.0940811
transcript-124_50716_75PE	.	.	-4.17287	0.000118321	NA	NA																transcript-124_8858_75PE|m.23004
Contig1228	.	.	-4.16225	0.0060944	2.57803	0.0674604
transcript-124_54976_75PE|m.60418	Plectin;	Plectin;	-4.16122	0.0245048	NA	NA																transcript-124_12628_75PE
Contig2702	.	.	-4.147	0.000150895	2.29639	0.0146575
transcript-124_70193_75PE|m.70737	Nesprin-1;	Nesprin-1;	-4.14044	0.000262111	NA	NA																R1_Contig3016
Contig3301|m.13578	Signal recognition particle subunit SRP72;	Signal recognition particle subunit SRP72;	-4.13886	0.000243667	NA	NA																MinimusContig_1188
transcript-124_14286_75PE	.	.	-4.13451	5.19814e-05	1.56093	0.0881746
transcript-124_25062_75PE|m.37513	DnaJ homolog subfamily A member 1;	.	-4.09441	0.00203555	NA	NA																Contig2719
Contig3300	Sestrin-2 {ECO:0000305};	.	-4.08904	1.02147e-05	NA	NA																MinimusContig_773
transcript-124_36405_75PE	.	.	-4.07482	0.000253904	NA	NA																Contig3192|m.13490
transcript-124_84393_75PE	.	.	-4.05832	0.0173871	NA	NA																transcript-124_150_75PE|m.14315
R1_Contig7131|m.88970	Protein CWC15 homolog A;	Protein CWC15 homolog A;	-4.00715	0.00212597	NA	NA																transcript-124_15014_75PE
transcript-124_25062_75PE|m.37512	DnaJ homolog subfamily A member 1;	DnaJ homolog subfamily A member 1;	-3.98492	0.00289191	NA	NA																transcript-124_12378_75PE|m.26352
MinimusContig_2552|m.5176	Oxysterol-binding protein-related protein 1;	Oxysterol-binding protein-related protein 1;	-3.98196	0.000925454	NA	NA																transcript-124_2509_75PE|m.16773
MinimusContig_958|m.1654	Exosome component 10;	Exosome component 10;	-3.97887	0.00463024	NA	NA																MinimusContig_1719|m.3300
Myt_cherry_idba_rep_c15111	.	.	-3.96232	0.00750447	NA	NA																MinimusContig_3895
R2_Contig166|m.84629	Myelin expression factor 2;	Myelin expression factor 2;	-3.96098	6.96264e-06	NA	NA																transcript-124_22019_75PE
MinimusContig_108|m.202	.	.	-3.91512	0.000210041	NA	NA																Contig2709
transcript-124_10742_75PE|m.24759	.	.	-3.91343	0.00750447	NA	NA																MinimusContig_1372|m.2119
transcript-124_7244_75PE|m.21465	Pre-mRNA-processing factor 40 homolog B;	Pre-mRNA-processing factor 40 homolog B;	-3.89591	4.80095e-06	NA	NA																MinimusContig_390
transcript-124_11369_75PE	.	.	-3.88958	1.80657e-08	NA	NA																Myt_cherry_idba_c883|m.89928
transcript-124_31780_75PE|m.43040	DmX-like protein 2;	DmX-like protein 2;	-3.87931	0.0176181	NA	NA																MinimusContig_2581
R1_Contig7258|m.89062	Inward rectifier potassium channel 2;	ATP-sensitive inward rectifier potassium channel 12;	-3.87078	7.53239e-05	NA	NA																R1_Contig3367
transcript-124_91203_75PE	.	.	-3.85774	0.0221325	NA	NA																Contig781|m.11348
transcript-124_10743_75PE|m.24760	.	.	-3.85757	0.00667948	NA	NA																transcript-124_15408_75PE
transcript-124_32198_75PE	.	.	-3.85019	0.000196526	NA	NA																transcript-124_14571_75PE|m.28430
R1_Contig3179|m.86854	.	.	-3.84254	0.0220281	NA	NA																MinimusContig_1956|m.3890
transcript-124_21959_75PE|m.34762	Cyclic AMP-responsive element-binding protein 3-like protein 2;	Cyclic AMP-responsive element-binding protein 3-like protein 2;	-3.8389	0.000130938	NA	NA																R1_Contig1463|m.85825
R1_Contig7065	.	.	-3.8224	0.00450864	NA	NA																R1_Contig5989|m.88136
R1_Contig6122	.	.	-3.81185	9.30742e-05	NA	NA																transcript-124_16506_75PE
transcript-124_54412_75PE	.	.	-3.8118	0.00427796	NA	NA																transcript-124_5566_75PE
R1_Contig468|m.85144	Cytochrome b-c1 complex subunit 7;	Cytochrome b-c1 complex subunit 7;	-3.81162	0.0190295	NA	NA																MinimusContig_2326
R1_Contig468|m.85145	Cytochrome b-c1 complex subunit 7;	.	-3.80277	0.016835	NA	NA																MinimusContig_162|m.360
transcript-124_11160_75PE|m.25211	Alpha-(1,3)-fucosyltransferase 11;	Alpha-(1,3)-fucosyltransferase 11;	-3.79512	0.0204164	-2.79242	0.0461014
MinimusContig_6191	.	.	-3.78721	0.00385316	NA	NA																transcript-124_88247_75PE
MinimusContig_3634	.	.	-3.77876	0.00145511	NA	NA																MinimusContig_3|m.4
transcript-124_3527_75PE|m.17892	.	.	-3.77002	0.000565007	NA	NA																R1_Contig2132|m.86320
transcript-124_17979_75PE|m.31539	Transcription factor 25;	Transcription factor 25;	-3.75487	2.32002e-05	NA	NA																transcript-124_16254_75PE|m.29928
transcript-124_42026_75PE|m.50833	.	.	-3.74984	0.00532482	NA	NA																MinimusContig_3428
transcript-124_61142_75PE	.	.	-3.71008	0.0310141	NA	NA																transcript-124_4739_75PE|m.19139
Contig32|m.10502	.	.	-3.69936	0.026439	NA	NA																MinimusContig_3010|m.6157
R1_Contig1113	Acyl-CoA-binding protein;	.	-3.6953	0.000679981	NA	NA																R1_Contig3043
transcript-124_27404_75PE	.	.	-3.68367	0.000767608	NA	NA																transcript-124_563_75PE|m.14796
R1_Contig4901	.	.	-3.66836	0.000921237	NA	NA																MinimusContig_1513|m.2577
transcript-124_19944_75PE	.	.	-3.6588	5.24187e-05	NA	NA																MinimusContig_3673
Myt_cherry_idba_c4876|m.90820	.	.	-3.65445	0.0132522	NA	NA																R1_Contig6741
Contig1016|m.11631	.	.	-3.65419	0.00123606	NA	NA																MinimusContig_2062|m.4106
R1_Contig5838	Cytochrome b-c1 complex subunit 9;	.	-3.65227	0.0212789	2.87597	0.038019
R1_Contig5377	.	.	-3.63764	0.00380384	NA	NA																MinimusContig_1638
MinimusContig_6052	.	.	-3.63496	0.00292193	NA	NA																Contig286|m.10751
R1_Contig1674|m.85975	U4/U6 small nuclear ribonucleoprotein Prp3;	U4/U6 small nuclear ribonucleoprotein Prp3;	-3.63126	0.000887842	NA	NA																R1_Contig2793
MinimusContig_4475|m.8565	Eukaryotic translation initiation factor 3 subunit L {ECO:0000255|HAMAP-Rule:MF_03011};	Eukaryotic translation initiation factor 3 subunit L {ECO:0000255|HAMAP-Rule:MF_03011};	-3.63003	0.001419	NA	NA																R1_Contig4682
R3_Contig72	.	.	-3.62383	4.83796e-05	NA	NA																Contig3324|m.13598
transcript-124_85197_75PE	.	.	-3.61082	0.0321209	NA	NA																transcript-124_597_75PE
transcript-124_17398_75PE|m.30926	High affinity cGMP-specific 3',5'-cyclic phosphodiesterase 9A {ECO:0000305};	High affinity cGMP-specific 3',5'-cyclic phosphodiesterase 9A {ECO:0000305};	-3.60995	0.0588425	NA	NA																Contig435|m.10963
transcript-124_47814_75PE	.	.	-3.58672	0.0244887	NA	NA																Contig75_capround1|m.10447
Contig1286|m.11875	PDZ domain-containing protein GIPC1;	PDZ domain-containing protein GIPC1;	-3.58514	0.0518419	NA	NA																MinimusContig_2002|m.3985
transcript-124_8609_75PE|m.22743	.	.	-3.58483	0.000420935	NA	NA																MinimusContig_1742|m.3395
transcript-124_32394_75PE	.	.	-3.57842	0.0275265	NA	NA																transcript-124_1378_75PE|m.15664
MinimusContig_2261|m.4570	Resistance to inhibitors of cholinesterase protein 3;	Resistance to inhibitors of cholinesterase protein 3;	-3.56942	0.00669325	NA	NA																R1_Contig2687
R1_Contig8245|m.89593	Differentially expressed in FDCP 6 homolog;	Differentially expressed in FDCP 6 homolog;	-3.56807	1.04821e-05	NA	NA																R1_Contig4178
R1_Contig5268	.	.	-3.56294	0.0003014	NA	NA																Contig2868|m.13239
transcript-124_64218_75PE|m.66920	.	.	-3.56284	0.0964006	NA	NA																transcript-124_18162_75PE
R1_Contig8664	.	.	-3.56264	0.00574266	NA	NA																transcript-124_43077_75PE|m.51710
transcript-124_48412_75PE	.	.	-3.56106	0.0155609	NA	NA																Myt_cherry_idba_rep_c1267
Myt_cherry_idba_rep_c1531	.	.	-3.55217	0.00542422	NA	NA																transcript-124_685_75PE|m.14963
transcript-124_14096_75PE|m.28015	Major facilitator superfamily domain-containing protein 1;	Major facilitator superfamily domain-containing protein 1;	-3.54953	0.0171434	-2.78964	0.0230486
transcript-124_73434_75PE|m.72788	.	.	-3.5433	0.0634467	NA	NA																MinimusContig_2086|m.4177
transcript-124_29397_75PE	.	.	-3.53726	0.000677996	NA	NA																transcript-124_26315_75PE|m.38566
R2_Contig34	.	.	-3.5348	0.00247663	NA	NA																transcript-124_373_75PE|m.14577
R1_Contig1953|m.86192	Homeotic protein female sterile;	Bromodomain-containing protein 3;	-3.53229	0.0462507	-3.04478	0.0328172
transcript-124_34620_75PE	.	.	-3.528	0.00312269	NA	NA																transcript-124_312_75PE|m.14506
Myt_cherry_idba_rep_c14502	.	.	-3.51491	0.0310141	NA	NA																R1_Contig1307|m.85698
Contig3230|m.13527	T-complex protein 1 subunit gamma;	T-complex protein 1 subunit gamma;	-3.51325	0.00207375	NA	NA																MinimusContig_1478|m.2470
transcript-124_18657_75PE|m.32090	Mesenchyme-specific cell surface glycoprotein;	Mesenchyme-specific cell surface glycoprotein;	-3.49671	0.00412799	NA	NA																MinimusContig_1184
Contig778|m.11344	2,4-dienoyl-CoA reductase, mitochondrial;	2,4-dienoyl-CoA reductase, mitochondrial;	-3.47861	0.0218514	NA	NA																transcript-124_40864_75PE|m.49913
transcript-124_50571_75PE|m.57279	Leucine-rich repeat-containing protein 43;	Leucine-rich repeat-containing protein 43;	-3.47661	0.00407766	NA	NA																transcript-124_819_75PE|m.15115
transcript-124_3810_75PE	.	.	-3.4644	0.00623206	NA	NA																transcript-124_4098_75PE|m.18424
MinimusContig_3805|m.7527	.	.	-3.46353	0.00626001	NA	NA																transcript-124_19420_75PE|m.32740
MinimusContig_3805|m.7528	.	.	-3.46306	0.00667948	NA	NA																transcript-124_6521_75PE
transcript-124_65949_75PE	.	.	-3.45995	0.00333714	NA	NA																MinimusContig_5667
transcript-124_13072_75PE|m.27073	Tubby protein homolog;	Tubby-related protein 3;	-3.44203	0.0011182	NA	NA																transcript-124_19170_75PE|m.32523
R1_Contig8228|m.89575	Zinc finger and BTB domain-containing protein 7C;	Zinc finger and BTB domain-containing protein 7C;	-3.44108	0.00460659	NA	NA																Myt_cherry_idba_c10184
MinimusContig_616|m.1271	Progesterone-induced-blocking factor 1;	Progesterone-induced-blocking factor 1;	-3.42972	0.0572611	4.23314	0.00165181
transcript-124_13052_75PE|m.27050	Protein phosphatase 1 regulatory subunit 12B;	Protein phosphatase 1 regulatory subunit 12A;	-3.40153	0.00683109	NA	NA																MinimusContig_432|m.953
transcript-124_71121_75PE	.	.	-3.3905	0.00847189	NA	NA																Contig3089
Contig2138|m.12566	Protein prune homolog 2;	Protein prune homolog 2;	-3.38228	0.0499872	NA	NA																transcript-124_26064_75PE
transcript-124_69030_75PE	.	.	-3.38163	0.0771908	NA	NA																transcript-124_1313_75PE|m.15598
transcript-124_2526_75PE|m.16806	Myosin phosphatase Rho-interacting protein;	Myosin phosphatase Rho-interacting protein;	-3.36388	0.00111042	NA	NA																transcript-124_28712_75PE|m.40546
MinimusContig_2292|m.4641	Coronin-7;	Coronin-7;	-3.36195	0.00022897	NA	NA																R1_Contig611
MinimusContig_2412	.	.	-3.35996	1.72748e-05	NA	NA																Contig2937
transcript-124_13493_75PE|m.27496	Leucine-rich repeat-containing protein 47;	Leucine-rich repeat-containing protein 47;	-3.35979	0.00413381	-2.10807	0.0294315
transcript-124_18754_75PE|m.32183	.	.	-3.33137	0.0458942	NA	NA																Contig27_capround1
transcript-124_11565_75PE|m.25581	von Willebrand factor D and EGF domain-containing protein;	von Willebrand factor D and EGF domain-containing protein;	-3.32892	0.000471991	NA	NA																R1_Contig5472
R1_Contig5483|m.87860	39S ribosomal protein L15, mitochondrial;	39S ribosomal protein L15, mitochondrial;	-3.32814	0.0472424	NA	NA																R3_Contig33|m.84504
MinimusContig_703	.	.	-3.31487	0.0224043	NA	NA																R2_Contig578|m.84855
MinimusContig_3882|m.7640	.	.	-3.29758	4.33068e-05	NA	NA																transcript-124_59911_75PE|m.63937
transcript-124_15218_75PE	.	.	-3.27969	0.000117357	NA	NA																transcript-124_35452_75PE
transcript-124_1842_75PE|m.16074	.	.	-3.27557	0.0456849	NA	NA																transcript-124_3647_75PE|m.17967
MinimusContig_893|m.1583	.	.	-3.27078	0.000213469	NA	NA																Contig1794
transcript-124_14479_75PE|m.28340	Collagen alpha-1(VIII) chain;	Collagen alpha-1(VIII) chain;	-3.26392	0.0071462	NA	NA																transcript-124_60146_75PE
transcript-124_1064_75PE	.	.	-3.26259	0.0159779	NA	NA																R2_Contig453|m.84808
R1_Contig7138|m.88975	GTP-binding protein 128up;	GTP-binding protein 128up;	-3.25298	0.00179334	-1.5525	0.0958261
Contig2497|m.12868	Spectrin alpha chain;	Spectrin alpha chain;	-3.25127	0.000343517	NA	NA																MinimusContig_1187|m.1781
transcript-124_39102_75PE	.	.	-3.2479	0.006473	NA	NA																R1_Contig5324
MinimusContig_4069	.	.	-3.24068	0.00228509	NA	NA																MinimusContig_335
Myt_cherry_idba_c8294	.	.	-3.23901	0.0288471	NA	NA																R1_Contig1163|m.85596
transcript-124_13192_75PE|m.27173	.	.	-3.23687	0.0822178	NA	NA																R2_Contig298
Myt_cherry_idba_rep_c7693	.	.	-3.22954	0.0315476	NA	NA																transcript-124_32892_75PE
transcript-124_595_75PE|m.14839	Cyclin-dependent kinase-like 2;	Cyclin-dependent kinase-like 2;	-3.22602	0.00185884	NA	NA																transcript-75_5325
MinimusContig_2782|m.5681	Major facilitator superfamily domain-containing protein 1;	Major facilitator superfamily domain-containing protein 1;	-3.21774	0.0494741	-2.67897	0.0416818
Myt_cherry_idba_c4815|m.90802	Zinc finger protein ZPR1;	Zinc finger protein ZPR1;	-3.21404	0.0496261	NA	NA																Contig3008|m.13347
transcript-124_4187_75PE|m.18510	Transmembrane channel-like protein 5;	Transmembrane channel-like protein 5;	-3.21164	0.00102779	NA	NA																Myt_cherry_idba_rep_c10861
transcript-124_12132_75PE|m.26132	Nose resistant to fluoxetine protein 6;	Nose resistant to fluoxetine protein 6;	-3.20117	0.00680615	NA	NA																R1_Contig2343|m.86454
R1_Contig6504|m.88436	Chitotriosidase-1;	Chitotriosidase-1;	-3.20074	0.00685492	NA	NA																R1_Contig7083
R2_Contig125|m.84603	Usher syndrome type-1G protein;	Usher syndrome type-1G protein;	-3.19631	0.0117456	2.35251	0.0261915
transcript-124_84851_75PE	.	.	-3.18395	0.0813855	NA	NA																transcript-124_65209_75PE
transcript-124_837_LongLar8	.	.	-3.17369	0.0399847	NA	NA																Contig3339|m.13613
transcript-124_9160_75PE	.	.	-3.17178	0.00190391	NA	NA																Contig1191
transcript-124_38064_75PE|m.47882	Rho guanine nucleotide exchange factor 10;	Rho guanine nucleotide exchange factor 10;	-3.16834	0.0617728	NA	NA																transcript-124_13789_75PE
transcript-124_9161_75PE	.	.	-3.16621	0.00167857	NA	NA																R1_Contig6264
R1_Contig4408|m.87433	Cleavage and polyadenylation specificity factor subunit 5;	Cleavage and polyadenylation specificity factor subunit 5;	-3.16474	0.0154191	NA	NA																transcript-124_79123_75PE|m.76296
R1_Contig6068|m.88189	Glutathione S-transferase A;	Glutathione S-transferase A;	-3.16443	0.0321209	NA	NA																transcript-124_42966_75PE|m.51606
transcript-30_5984	.	.	-3.15974	0.0385775	NA	NA																MinimusContig_237|m.514
transcript-124_7472_75PE|m.21658	Anion exchange protein 2;	Anion exchange protein 2;	-3.15799	0.000527554	NA	NA																R1_Contig1545|m.85884
transcript-124_9696_75PE	.	.	-3.15728	0.00031459	NA	NA																R1_Contig3158|m.86845
transcript-124_77543_75PE	.	.	-3.14431	0.0796321	NA	NA																R1_Contig7547
transcript-124_1994_75PE|m.16274	Cell division cycle and apoptosis regulator protein 1;	Cell division cycle and apoptosis regulator protein 1;	-3.13989	0.000502673	NA	NA																transcript-124_21542_75PE|m.34428
Myt_cherry_idba_rep_c3291|m.90345	.	.	-3.13882	0.0137242	NA	NA																transcript-124_39726_75PE
Myt_cherry_idba_rep_c3465|m.90384	Serine/threonine kinase-like domain-containing protein STKLD1;	Serine/threonine kinase-like domain-containing protein STKLD1;	-3.13435	0.000436436	NA	NA																transcript-124_59911_75PE|m.63939
R1_Contig4770|m.87567	Leucine-rich repeat and death domain-containing protein 1;	Leucine-rich repeat and death domain-containing protein 1;	-3.13411	0.0032886	NA	NA																R1_Contig3391|m.86962
transcript-124_59368_75PE	.	.	-3.1186	0.0689139	NA	NA
transcript-124_47672_75PE|m.55082	Four-domain proteases inhibitor;	Four-domain proteases inhibitor;	-3.1101	0.00539408	NA	NA
Contig2492|m.12864	Eukaryotic peptide chain release factor subunit 1;	Eukaryotic peptide chain release factor subunit 1;	-3.10397	0.00390575	NA	NA
transcript-124_5021_75PE	.	.	-3.09482	0.00664429	NA	NA
transcript-30_6067|m.93309	Chitotriosidase-1;	Chitotriosidase-1;	-3.08766	0.0122276	NA	NA
transcript-124_8408_75PE|m.22518	Leucine zipper putative tumor suppressor 2 homolog {ECO:0000255|HAMAP-Rule:MF_03026};	Leucine zipper putative tumor suppressor 2 homolog {ECO:0000255|HAMAP-Rule:MF_03026};	-3.08014	0.00263135	NA	NA
R1_Contig2548	.	.	-3.07849	0.00199696	NA	NA
Contig2144|m.12571	1-phosphatidylinositol 4,5-bisphosphate phosphodiesterase gamma-1;	1-phosphatidylinositol 4,5-bisphosphate phosphodiesterase gamma-1;	-3.07608	0.000925081	NA	NA
transcript-124_24141_75PE	.	.	-3.07596	0.00652067	2.85353	0.00128237
transcript-124_27951_75PE	.	.	-3.06647	0.000996387	NA	NA
transcript-60_2193	.	.	-3.05581	0.0102823	NA	NA
transcript-124_73888_75PE	.	.	-3.05259	0.0459068	NA	NA
transcript-124_84396_75PE	.	.	-3.05099	0.0873448	NA	NA
Contig3228|m.13523	Neuronal PAS domain-containing protein 4 {ECO:0000305};	Neuronal PAS domain-containing protein 4 {ECO:0000305};	-3.04928	0.0130067	NA	NA
MinimusContig_1720|m.3301	Homer protein homolog 2;	Homer protein homolog 2;	-3.04385	0.0851008	NA	NA
transcript-124_55369_75PE	.	.	-3.0359	0.00399526	-1.88398	0.0400043
R1_Contig5902|m.88063	Zinc finger and BTB domain-containing protein 7C;	Zinc finger and BTB domain-containing protein 7C;	-3.03406	0.0258388	NA	NA
transcript-124_2556_75PE|m.16847	Zinc finger protein ush;	Zinc finger protein ZFPM1;	-3.03188	0.0144161	NA	NA
transcript-124_42976_75PE|m.51612	.	.	-3.02892	0.00237802	NA	NA
Myt_cherry_idba_rep_c12641	.	.	-3.02642	0.00558233	NA	NA
transcript-124_80335_75PE	.	.	-3.02528	0.0154418	NA	NA
transcript-124_6212_75PE|m.20484	.	Transmembrane protein 263;	-3.01421	0.0602763	NA	NA
transcript-124_7596_75PE|m.21764	Palmitoleoyl-protein carboxylesterase NOTUM {ECO:0000250|UniProtKB:Q6P988};	Palmitoleoyl-protein carboxylesterase NOTUM {ECO:0000250|UniProtKB:Q6P988};	-3.01083	2.01125e-05	-1.60828	0.0117266
MinimusContig_1534|m.2673	Microprocessor complex subunit DGCR8;	Microprocessor complex subunit DGCR8;	-2.99614	0.00985919	3.54102	0.000123156
R2_Contig329|m.84734	MORN repeat-containing protein 3;	MORN repeat-containing protein 3;	-2.99133	0.0823884	NA	NA
transcript-124_1075_75PE|m.15320	Probable RNA-directed DNA polymerase from transposon BS;	Probable RNA-directed DNA polymerase from transposon BS;	-2.98142	0.000394663	NA	NA
transcript-124_48213_75PE|m.55511	.	Asparagine-rich protein;	-2.97098	0.0416923	NA	NA
transcript-124_11190_75PE|m.25237	Proprotein convertase subtilisin/kexin type 6;	Proprotein convertase subtilisin/kexin type 6;	-2.96807	0.00388627	NA	NA
Myt_cherry_idba_rep_c16204	.	.	-2.96541	0.00617915	NA	NA
transcript-124_12073_75PE	.	.	-2.96056	8.27781e-05	NA	NA
transcript-124_39144_75PE	.	.	-2.95702	0.0135539	NA	NA
Myt_cherry_idba_rep_c2055	.	.	-2.95615	0.0145683	NA	NA
Myt_cherry_idba_rep_c1187|m.89981	Integrator complex subunit 14 {ECO:0000250|UniProtKB:Q96SY0};	Integrator complex subunit 14 {ECO:0000312|MGI:MGI:1917132};	-2.9491	0.0441094	NA	NA
R1_Contig3898	.	.	-2.94528	0.000123456	NA	NA
R1_Contig6139	.	.	-2.94393	0.00698789	-1.83321	0.056963
transcript-124_1546_75PE|m.15816	Papilin;	Papilin;	-2.93806	0.000300395	NA	NA
MinimusContig_5827	.	.	-2.93505	0.0355632	NA	NA
MinimusContig_668|m.1333	.	.	-2.9326	0.0308292	NA	NA
transcript-124_37827_75PE|m.47714	Nucleolar protein 12;	Nucleolar protein 12;	-2.92836	0.0257808	NA	NA
transcript-124_21909_75PE|m.34725	Endonuclease/exonuclease/phosphatase family domain-containing protein 1;	Endonuclease/exonuclease/phosphatase family domain-containing protein 1;	-2.92726	0.000770959	NA	NA
R1_Contig416|m.85115	PDZ and LIM domain protein Zasp;	PDZ and LIM domain protein Zasp;	-2.92286	4.33068e-05	NA	NA
transcript-124_28977_75PE	.	.	-2.92265	0.0215487	NA	NA
MinimusContig_1902	.	.	-2.92091	0.00741758	NA	NA
R1_Contig3212	.	.	-2.92016	0.0138628	NA	NA
transcript-124_46778_75PE	.	.	-2.91834	0.099837	NA	NA
Contig271|m.10732	Catenin beta;	Catenin beta;	-2.91361	0.0136965	NA	NA
Contig2671|m.13027	Microphthalmia-associated transcription factor;	Microphthalmia-associated transcription factor;	-2.91071	0.0505591	NA	NA
MinimusContig_1627|m.3022	Ankyrin repeat and MYND domain-containing protein 1;	Ankyrin repeat and MYND domain-containing protein 1;	-2.90969	0.00247663	NA	NA
R1_Contig1253	.	.	-2.90782	0.0283545	NA	NA
MinimusContig_207	.	.	-2.90366	0.000735571	NA	NA
transcript-124_17529_75PE	.	.	-2.89891	0.0283545	NA	NA
R1_Contig4332	.	.	-2.89272	0.0181151	NA	NA
Contig3086|m.13410	Histone deacetylase 1;	.	-2.89099	0.0215487	NA	NA
MinimusContig_927	.	.	-2.88225	2.10052e-05	NA	NA
Contig1831	.	.	-2.88027	0.0286489	3.68373	0.000397565
Myt_cherry_idba_rep_c1672	.	.	-2.87696	9.71134e-05	1.61692	0.0135244
MinimusContig_2530|m.5128	MAM and LDL-receptor class A domain-containing protein 2;	MAM and LDL-receptor class A domain-containing protein 1;	-2.87648	0.00714535	1.66693	0.0957449
transcript-75_1969|m.93474	.	.	-2.87461	0.0749752	NA	NA
transcript-55_3531	.	.	-2.87287	0.0499819	NA	NA
Myt_cherry_idba_rep_c11748	.	.	-2.87252	0.000419931	NA	NA
transcript-124_62841_75PE	.	.	-2.86936	0.0616481	NA	NA
Myt_cherry_idba_c4254|m.90602	Protein phosphatase 1G {ECO:0000305};	Protein phosphatase 1G;	-2.85821	0.0090724	NA	NA
transcript-124_92631_75PE	.	.	-2.8565	0.0154603	NA	NA
transcript-124_22941_75PE	.	.	-2.85465	0.01335	NA	NA
transcript-124_67715_75PE|m.69173	.	.	-2.85024	0.0721593	2.39463	0.0723895
MinimusContig_915|m.1602	.	.	-2.84437	0.0356601	NA	NA
Contig50	Elongation factor 1-alpha 2;	.	-2.83679	0.00301233	NA	NA
transcript-124_2136_75PE|m.16413	Neurogenic locus Notch protein;	Neurogenic locus Notch protein;	-2.83625	0.00131296	NA	NA
transcript-124_1259_75PE|m.15566	Ubiquitin-associated protein 2;	Ubiquitin-associated protein 2;	-2.83064	0.00031459	-1.84874	0.00845526
transcript-124_14674_75PE	.	.	-2.82384	0.0014716	-1.49329	0.0462887
transcript-124_31426_75PE	.	.	-2.81719	0.0227891	3.29145	0.00109446
Contig654|m.11209	.	.	-2.81344	0.00833279	NA	NA
Contig3295|m.13571	GRIP and coiled-coil domain-containing protein 2;	GRIP and coiled-coil domain-containing protein 2;	-2.81301	0.00013335	NA	NA
MinimusContig_3746	.	.	-2.81067	6.3594e-05	NA	NA
transcript-124_66357_75PE	.	.	-2.80868	0.0241077	NA	NA
transcript-124_26442_75PE|m.38670	.	.	-2.80388	0.000996387	NA	NA
transcript-124_3867_75PE|m.18189	Probable ATP-dependent RNA helicase DDX23;	Probable ATP-dependent RNA helicase DDX23;	-2.79212	0.00428445	NA	NA
transcript-124_5294_75PE|m.19664	Tubulin alpha-2/alpha-4 chain;	Tubulin alpha-1C chain;	-2.78421	0.0122302	NA	NA
transcript-124_10993_LongLar8	.	.	-2.78097	0.00560836	NA	NA
transcript-55_11316	.	.	-2.78055	0.038021	NA	NA
MinimusContig_251|m.541	WASH complex subunit 2 {ECO:0000312|MGI:MGI:106463};	WASH complex subunit 2 {ECO:0000312|RGD:735230};	-2.77949	0.000235846	NA	NA
Myt_cherry_idba_rep_c8501|m.91990	Neuronal acetylcholine receptor subunit alpha-10;	Neuronal acetylcholine receptor subunit alpha-10;	-2.76206	0.0724723	NA	NA
transcript-124_65966_75PE	.	.	-2.76157	0.00667103	NA	NA
R2_Contig248	.	.	-2.75356	0.0472438	NA	NA
Myt_cherry_idba_c16105	.	.	-2.75078	0.0356806	NA	NA
transcript-124_53921_75PE|m.59725	Thioredoxin domain-containing protein 17 {ECO:0000305};	Thioredoxin domain-containing protein 17 {ECO:0000305};	-2.74822	0.0653592	NA	NA
transcript-124_8476_75PE|m.22603	Serine/threonine-protein phosphatase 5;	Serine/threonine-protein phosphatase 5;	-2.74515	0.0114275	NA	NA
transcript-124_59576_75PE	.	.	-2.74226	0.00640758	NA	NA
transcript-124_8858_75PE|m.23004	Rab GTPase-binding effector protein 1;	Rab GTPase-binding effector protein 1;	-2.74033	0.0441223	-2.69216	0.00893642
MinimusContig_2923|m.5977	Centromere protein J;	Centromere protein J;	-2.73977	0.00651238	NA	NA
transcript-124_19173_75PE	.	.	-2.73517	0.00379951	NA	NA
transcript-124_15575_75PE	.	.	-2.72377	0.0802406	NA	NA
MinimusContig_4712	.	.	-2.72142	0.0685347	NA	NA
transcript-124_66154_75PE	.	.	-2.71248	0.00399526	NA	NA
transcript-124_6233_75PE|m.20499	Cysteine--tRNA ligase, cytoplasmic;	Cysteine--tRNA ligase, cytoplasmic;	-2.70806	0.0170095	NA	NA
transcript-124_14180_75PE|m.28087	Caspase-8;	Caspase-8;	-2.70752	0.0259671	NA	NA
Contig2066|m.12516	Transcription factor Dp-2;	Transcription factor Dp-2;	-2.70608	0.0206755	NA	NA
R1_Contig5547	.	.	-2.70482	0.0238091	NA	NA
transcript-124_962_75PE|m.15243	Protein strawberry notch homolog 1;	Protein strawberry notch homolog 1;	-2.70174	0.0126509	NA	NA
Contig92|m.10530	.	.	-2.70092	0.0405216	NA	NA
transcript-124_27576_75PE	.	.	-2.68481	0.0366686	NA	NA
transcript-124_9746_75PE|m.23773	Leucine-rich repeat flightless-interacting protein 2;	Leucine-rich repeat flightless-interacting protein 2;	-2.68372	0.095706	NA	NA
Contig883|m.11464	Heterogeneous nuclear ribonucleoprotein 87F;	Heterogeneous nuclear ribonucleoprotein 87F;	-2.68099	0.0150311	NA	NA
transcript-124_5907_75PE|m.20246	Microtubule-associated protein 10;	Microtubule-associated protein 10;	-2.68075	0.0190295	2.30836	0.00647497
transcript-124_10157_75PE	.	.	-2.67826	0.00399151	NA	NA
R1_Contig2975	.	.	-2.67257	0.048782	NA	NA
transcript-124_2490_75PE|m.16748	Aminopeptidase N {ECO:0000305};	Aminopeptidase N {ECO:0000305};	-2.67244	0.00487902	NA	NA
transcript-124_12628_75PE	.	.	-2.66401	0.0176181	1.71381	0.0886266
Contig970|m.11566	Basement membrane-specific heparan sulfate proteoglycan core protein;	Basement membrane-specific heparan sulfate proteoglycan core protein;	-2.6531	0.000274141	2.14202	0.000229007
transcript-124_33530_75PE	.	.	-2.64638	0.0172026	NA	NA
Contig2564|m.12919	Eukaryotic translation initiation factor 5B;	Eukaryotic translation initiation factor 5B;	-2.6451	0.00442552	NA	NA
transcript-124_11885_75PE|m.25867	Zinc finger protein 271;	Zinc finger protein 271;	-2.64032	0.00202026	NA	NA
MinimusContig_3029|m.6196	Serine palmitoyltransferase 2;	Serine palmitoyltransferase 2;	-2.63712	0.0145767	NA	NA
R1_Contig3016	.	.	-2.63539	0.0662579	3.10194	0.00292742
MinimusContig_2425	.	.	-2.62956	0.000523287	NA	NA
Contig3_capround1|m.10375	Coiled-coil domain-containing protein 40 {ECO:0000305};	Coiled-coil domain-containing protein 40 {ECO:0000305};	-2.62838	0.0077827	NA	NA
R1_Contig6136|m.88226	Flotillin-2;	Flotillin-2a;	-2.62567	0.0754006	NA	NA
transcript-124_5750_75PE|m.20106	Ral GTPase-activating protein subunit beta;	Ral GTPase-activating protein subunit beta;	-2.62524	0.000859847	NA	NA
MinimusContig_720	.	.	-2.62222	0.0153551	NA	NA
transcript-124_3890_75PE|m.18204	Protocadherin Fat 1;	Cadherin EGF LAG seven-pass G-type receptor 3;	-2.62202	0.0113172	NA	NA
MinimusContig_4188|m.8148	E3 ubiquitin-protein ligase UBR4;	E3 ubiquitin-protein ligase UBR4;	-2.62159	0.0215487	NA	NA
Contig2428	.	.	-2.61756	0.0541403	NA	NA
MinimusContig_614|m.1266	INO80 complex subunit B;	INO80 complex subunit B;	-2.61754	0.0787427	NA	NA
R1_Contig2282|m.86413	Protein TBRG4;	Protein TBRG4;	-2.61727	0.00632999	NA	NA
transcript-124_26048_75PE	.	.	-2.61524	0.0224043	NA	NA
transcript-124_5698_75PE|m.20036	Exostosin-1b;	Exostosin-1b;	-2.6128	0.000420935	NA	NA
transcript-124_39813_75PE	.	.	-2.60424	0.0283431	NA	NA
MinimusContig_2012|m.4003	Cytochrome P450 4F6;	Cytochrome P450 4F6;	-2.60334	0.00428445	NA	NA
Contig3369|m.13638	Vitamin D3 receptor;	Vitamin D3 receptor;	-2.60197	0.0805339	NA	NA
MinimusContig_4399	.	.	-2.59988	0.0203364	NA	NA
transcript-124_38390_75PE	.	.	-2.59964	0.00808129	NA	NA
MinimusContig_4033|m.7885	TBC1 domain family member 19;	TBC1 domain family member 19;	-2.59522	0.000123654	NA	NA
transcript-124_30953_75PE	.	.	-2.59005	0.0772326	NA	NA
R1_Contig6232|m.88292	.	.	-2.58852	0.00126619	NA	NA
transcript-124_11440_LongLar8	.	.	-2.58186	0.0297821	NA	NA
transcript-124_1066_75PE|m.15313	Fibropellin-1;	Fibropellin-1;	-2.58183	0.00828744	NA	NA
R1_Contig4347|m.87415	.	Collagen alpha-1(XVII) chain;	-2.57537	0.00875268	NA	NA
transcript-124_60_75PE|m.14202	Neurogenic locus Notch protein;	Neurogenic locus Notch protein;	-2.57308	0.00271896	NA	NA
MinimusContig_2422|m.4901	.	.	-2.57156	0.00413608	NA	NA
transcript-124_42807_75PE	.	.	-2.57085	0.0258824	NA	NA
Myt_cherry_idba_c14050	.	.	-2.56472	0.00183631	NA	NA
transcript-124_8423_75PE|m.22537	Targeting protein for Xklp2 homolog;	Targeting protein for Xklp2 homolog;	-2.55927	0.0320662	NA	NA
transcript-124_30403_75PE	.	.	-2.55814	0.0440676	NA	NA
MinimusContig_1188	.	.	-2.55798	0.00119257	-1.20668	0.0639784
MinimusContig_2924	.	.	-2.55424	0.000300395	NA	NA
MinimusContig_243	.	.	-2.55107	0.0180205	NA	NA
transcript-124_24619_75PE	.	.	-2.54897	0.0444073	NA	NA
Myt_cherry_idba_c4443|m.90690	PP2C-like domain-containing protein CG9801;	PP2C-like domain-containing protein CG9801;	-2.5486	0.0256594	NA	NA
transcript-124_17773_75PE|m.31309	.	.	-2.53728	0.0574574	-2.18944	0.0379632
transcript-124_28145_75PE	.	.	-2.53559	0.0230393	NA	NA
Contig2719	.	.	-2.5349	0.0537994	2.38549	0.0163027
MinimusContig_1691|m.3230	Ribosome biogenesis protein WDR12 homolog {ECO:0000255|HAMAP-Rule:MF_03029};	Male-specific lethal 1 homolog;	-2.53314	0.0296913	NA	NA
transcript-124_41820_75PE|m.50644	Cathepsin L2;	Cathepsin L2;	-2.53242	0.0925277	NA	NA
transcript-124_23091_75PE|m.35756	Serine/threonine-protein phosphatase 4 catalytic subunit;	Serine/threonine-protein phosphatase 4 catalytic subunit;	-2.53114	0.0621582	NA	NA
transcript-124_9013_75PE|m.23124	Proline and serine-rich protein 3;	Proline and serine-rich protein 3;	-2.52992	0.00462733	NA	NA
transcript-124_10724_75PE|m.24738	Programmed cell death protein 7;	Programmed cell death protein 7;	-2.52733	0.0286489	NA	NA
MinimusContig_2149|m.4298	Nucleolar and spindle-associated protein 1;	Nucleolar and spindle-associated protein 1;	-2.52533	0.0304053	NA	NA
transcript-124_53989_75PE	.	.	-2.52423	0.0444511	NA	NA
transcript-124_24331_75PE|m.36858	.	.	-2.51703	0.00553638	NA	NA
R1_Contig2427|m.86503	HAUS augmin-like complex subunit 5;	HAUS augmin-like complex subunit 5;	-2.51549	0.0717515	NA	NA
Myt_cherry_idba_rep_c11241	.	.	-2.51279	0.0146024	NA	NA
MinimusContig_3454	.	.	-2.51257	0.00462229	NA	NA
MinimusContig_2510|m.5086	Zinc finger CCCH domain-containing protein 13;	Zinc finger CCCH domain-containing protein 13;	-2.51162	0.00176052	NA	NA
R1_Contig2579	.	.	-2.50737	0.0531311	NA	NA
transcript-124_55571_75PE	.	.	-2.50726	0.0622626	NA	NA
MinimusContig_2186	.	.	-2.50712	0.00344493	NA	NA
MinimusContig_1367|m.2095	Zinc finger matrin-type protein 3;	Eukaryotic translation initiation factor 3 subunit A {ECO:0000255|HAMAP-Rule:MF_03000};	-2.50659	0.0154603	NA	NA
transcript-124_30916_75PE|m.42353	Transient receptor potential cation channel subfamily V member 5;	Transient receptor potential cation channel subfamily V member 5;	-2.50371	0.00190391	NA	NA
transcript-124_40862_75PE	.	.	-2.50093	0.00561623	NA	NA
transcript-124_8070_75PE|m.22208	E3 ubiquitin-protein ligase UHRF1;	E3 ubiquitin-protein ligase UHRF1;	-2.50063	0.0572034	NA	NA
MinimusContig_1402|m.2212	.	.	-2.50047	0.0686083	NA	NA
MinimusContig_2175|m.4368	Double-strand break repair protein MRE11;	Double-strand break repair protein MRE11;	-2.49895	0.0182708	NA	NA
MinimusContig_905|m.1594	Adhesion G protein-coupled receptor L2;	Adhesion G protein-coupled receptor L2;	-2.4893	0.00786418	NA	NA
transcript-124_14509_75PE|m.28376	.	.	-2.48808	0.0641521	NA	NA
transcript-124_10293_75PE	.	.	-2.48775	0.00267105	NA	NA
MinimusContig_187	.	.	-2.48534	0.0261086	NA	NA
MinimusContig_2569	.	.	-2.47752	0.0316151	NA	NA
transcript-124_37788_75PE	.	.	-2.4768	0.0403943	NA	NA
Contig2604	.	.	-2.47379	0.00722122	NA	NA
MinimusContig_268|m.584	97 kDa heat shock protein;	Heat shock protein 105 kDa;	-2.46807	0.00648971	NA	NA
MinimusContig_740|m.1415	EF-hand domain-containing family member C2;	EF-hand domain-containing family member C2;	-2.46741	0.00976673	NA	NA
transcript-124_16025_75PE	.	.	-2.46633	0.0235989	NA	NA
MinimusContig_1629|m.3027	Ubiquitin carboxyl-terminal hydrolase CYLD;	Ubiquitin carboxyl-terminal hydrolase CYLD;	-2.46614	0.017195	NA	NA
transcript-124_46515_75PE	.	.	-2.466	0.00553665	NA	NA
Contig79|m.10524	.	.	-2.46553	0.0257808	NA	NA
R1_Contig1788	.	.	-2.46429	0.0728054	NA	NA
MinimusContig_4787	.	.	-2.45424	0.0257914	NA	NA
R1_Contig6989|m.88876	Sialin;	Sialin;	-2.45284	0.0169592	NA	NA
Myt_cherry_idba_rep_c4616|m.90740	.	.	-2.44944	0.0313076	NA	NA
transcript-124_6310_75PE|m.20588	Calcium/calmodulin-dependent 3',5'-cyclic nucleotide phosphodiesterase 1 {ECO:0000305};	Calcium/calmodulin-dependent 3',5'-cyclic nucleotide phosphodiesterase 1 {ECO:0000305};	-2.44769	0.0457004	NA	NA
Myt_cherry_idba_rep_c10872	.	.	-2.44534	0.0444073	NA	NA
MinimusContig_2447	.	.	-2.44357	6.68667e-05	NA	NA
MinimusContig_2772	.	.	-2.44269	0.00919808	NA	NA
transcript-124_78702_75PE	.	.	-2.44111	0.0847349	NA	NA
MinimusContig_773	.	.	-2.44107	0.000806231	1.27437	0.0409115
transcript-124_26399_75PE|m.38641	.	.	-2.43934	0.0116488	NA	NA
Myt_cherry_idba_rep_c297	Polyubiquitin;	.	-2.43628	0.0720035	NA	NA
transcript-124_3152_75PE|m.17458	Putative tyrosinase-like protein tyr-3;	Putative tyrosinase-like protein tyr-1;	-2.43589	0.0108203	NA	NA
Contig3192|m.13490	ATP synthase subunit delta, mitochondrial;	ATP synthase subunit delta, mitochondrial;	-2.42909	0.0794988	-2.37978	0.0127855
Contig2731	V-type proton ATPase 116 kDa subunit a isoform 1;	.	-2.42835	0.0181589	NA	NA
transcript-124_203_75PE|m.14380	Nipped-B-like protein;	Nipped-B-like protein;	-2.42832	0.0123893	NA	NA
Contig466|m.11004	ATP-binding cassette sub-family F member 2;	ATP-binding cassette sub-family F member 2;	-2.42797	0.0574237	NA	NA
MinimusContig_1390|m.2179	Nesprin-1;	Nesprin-1;	-2.42779	0.00539408	NA	NA
MinimusContig_2022|m.4021	E3 ubiquitin-protein ligase RFWD2;	E3 ubiquitin-protein ligase RFWD2;	-2.42443	0.0122302	NA	NA
transcript-35_6550	Calponin-3;	.	-2.42168	0.0749752	NA	NA
Contig3237|m.13534	Caspase activity and apoptosis inhibitor 1;	Caspase activity and apoptosis inhibitor 1;	-2.41776	0.0495066	NA	NA
Contig1984|m.12457	.	.	-2.4176	0.00667534	NA	NA
R3_Contig73	.	.	-2.41336	0.0423909	NA	NA
transcript-124_2515_75PE|m.16791	PHD finger protein 20-like protein 1;	PHD finger protein 20-like protein 1;	-2.41211	0.00022897	NA	NA
R1_Contig3417	.	.	-2.41137	0.0153824	NA	NA
MinimusContig_3361|m.6756	Hillarin {ECO:0000312|FlyBase:FBgn0050147};	Hillarin {ECO:0000312|FlyBase:FBgn0050147};	-2.40581	0.00634872	NA	NA
Myt_cherry_idba_rep_c3673|m.90435	.	.	-2.40388	0.0171434	NA	NA
transcript-124_4443_75PE|m.18847	DNA repair protein XRCC1;	DNA repair protein XRCC1;	-2.40301	0.0564737	NA	NA
transcript-124_2048_75PE|m.16329	Calpain-D;	Calpain-D;	-2.39716	0.000911811	NA	NA
transcript-124_42126_75PE	.	.	-2.39679	0.00662364	NA	NA
transcript-124_150_75PE|m.14315	Zinc finger protein GLIS3;	Zinc finger protein GLIS3;	-2.39366	0.0200163	-2.66334	0.000288649
transcript-124_11172_75PE|m.25224	.	Neuromedin-U receptor 1;	-2.3906	0.0352593	NA	NA
transcript-124_23616_75PE|m.36274	Alpha-1,6-mannosyl-glycoprotein 2-beta-N-acetylglucosaminyltransferase;	Alpha-1,6-mannosyl-glycoprotein 2-beta-N-acetylglucosaminyltransferase;	-2.37746	0.0444073	NA	NA
transcript-124_25538_75PE|m.37927	.	.	-2.37579	0.0394949	NA	NA
transcript-124_15014_75PE	.	.	-2.37493	0.00597049	-1.69645	0.0249757
transcript-124_19079_75PE|m.32470	TATA element modulatory factor;	TATA element modulatory factor;	-2.37275	0.0256814	NA	NA
MinimusContig_951	.	.	-2.37074	0.0182496	NA	NA
transcript-35_7815	.	.	-2.36829	0.0403557	NA	NA
transcript-124_12378_75PE|m.26352	Neuronal acetylcholine receptor subunit alpha-10;	Neuronal acetylcholine receptor subunit alpha-10;	-2.36578	0.0182442	1.84612	0.0194135
MinimusContig_6169	.	.	-2.36499	0.0528211	NA	NA
MinimusContig_3213	.	.	-2.36446	0.0155609	NA	NA
transcript-124_23293_75PE	.	.	-2.3599	0.00614121	NA	NA
R1_Contig1352|m.85731	Uncharacterized protein C4orf22 homolog;	Uncharacterized protein C4orf22 homolog;	-2.35964	0.092408	NA	NA
transcript-124_9839_75PE	.	.	-2.35662	0.0550235	NA	NA
transcript-124_19973_75PE	.	.	-2.35119	0.00197807	NA	NA
transcript-124_22130_75PE|m.34905	.	.	-2.35067	0.0179204	NA	NA
R1_Contig4847	.	.	-2.34326	0.0854398	NA	NA
transcript-124_6519_75PE	.	.	-2.34099	0.00299451	NA	NA
MinimusContig_4132|m.8053	Beta-1,3-glucan-binding protein {ECO:0000312|EMBL:AAM21213.1};	Beta-1,3-glucan-binding protein {ECO:0000312|EMBL:AAM21213.1};	-2.3405	0.00381978	NA	NA
transcript-124_57559_75PE|m.62288	.	Mammalian ependymin-related protein 1;	-2.33764	0.0347671	NA	NA
transcript-124_22431_75PE|m.35179	Protein prickle;	Testin;	-2.33762	0.0596634	NA	NA
transcript-124_2509_75PE|m.16773	E3 ubiquitin-protein ligase RNF213;	E3 ubiquitin-protein ligase RNF213;	-2.33497	0.0907843	-2.80955	0.00284113
transcript-124_37581_75PE	.	.	-2.33201	0.041782	NA	NA
transcript-124_11195_75PE	.	.	-2.32813	0.028602	NA	NA
Contig1972	.	.	-2.32749	0.0634467	NA	NA
MinimusContig_1719|m.3300	.	.	-2.32578	0.00508412	-1.24025	0.0973461
Contig568|m.11111	Probable splicing factor, arginine/serine-rich 7;	Probable splicing factor, arginine/serine-rich 7;	-2.32518	0.00491126	NA	NA
Contig2990	.	.	-2.32396	0.081591	NA	NA
transcript-124_14552_75PE|m.28416	Myocyte-specific enhancer factor 2A;	Myocyte-specific enhancer factor 2C;	-2.32234	0.0731671	NA	NA
R1_Contig7780	.	.	-2.32071	0.0377949	NA	NA
transcript-124_11404_75PE|m.25441	Protein dispatched homolog 1;	Protein dispatched homolog 1;	-2.32012	0.041782	NA	NA
R1_Contig3966	.	.	-2.31942	0.013346	NA	NA
transcript-124_42809_75PE	.	.	-2.31438	0.056438	NA	NA
transcript-124_9428_75PE|m.23508	Maestro heat-like repeat-containing protein family member 1;	Maestro heat-like repeat-containing protein family member 1;	-2.31298	0.0119888	NA	NA
transcript-124_1689_75PE	.	.	-2.31153	0.000130938	NA	NA
transcript-124_19688_75PE|m.32951	.	Transcription factor kayak, isoforms A/B/F;	-2.31035	0.0647819	NA	NA
Myt_cherry_idba_rep_c11259	.	.	-2.30637	0.0683067	NA	NA
MinimusContig_3895	.	.	-2.30444	0.0229178	-1.63799	0.0523651
MinimusContig_4125	.	.	-2.30381	0.00957112	NA	NA
MinimusContig_5929|m.10072	26S proteasome non-ATPase regulatory subunit 1;	26S proteasome non-ATPase regulatory subunit 1;	-2.29811	0.0580334	NA	NA
R1_Contig1505|m.85854	Nuclear pore complex protein Nup88;	Nuclear pore complex protein Nup88;	-2.29544	0.0109981	NA	NA
transcript-124_18398_75PE	.	.	-2.29532	0.0973465	NA	NA
transcript-124_22019_75PE	.	.	-2.29496	0.0721089	2.65877	0.00506018
R1_Contig1398	.	.	-2.29041	0.00378202	NA	NA
R1_Contig2514	.	.	-2.28971	0.0131623	NA	NA
Contig2709	.	.	-2.27979	0.0242308	1.67963	0.0544599
Contig1400	40S ribosomal protein S26;	.	-2.27771	0.0248595	NA	NA
transcript-124_807_75PE|m.15089	.	Mucin-1;	-2.26995	0.0114275	NA	NA
MinimusContig_6214	.	.	-2.26718	0.00897831	NA	NA
transcript-124_8508_75PE|m.22629	Peripheral plasma membrane protein CASK;	Peripheral plasma membrane protein CASK;	-2.26329	0.0266726	NA	NA
MinimusContig_1372|m.2119	Protein virilizer homolog;	Protein virilizer homolog;	-2.263	0.0075494	2.69763	7.55305e-05
MinimusContig_390	.	.	-2.2623	0.0534931	2.09445	0.0224095
MinimusContig_791|m.1473	.	Lysosome-associated membrane glycoprotein 1;	-2.25569	0.04939	NA	NA
R1_Contig1786|m.86073	Protein mab-21-like 3;	Protein mab-21-like 3;	-2.25447	0.0452765	NA	NA
Contig701|m.11259	Perlucin;	Perlucin;	-2.25275	0.0962569	NA	NA
MinimusContig_2052|m.4087	.	.	-2.25232	0.0114275	NA	NA
transcript-124_18802_75PE	.	.	-2.25198	0.00866419	NA	NA
Contig253|m.10711	Filamin-A;	Filamin-A;	-2.2519	0.0349806	NA	NA
R1_Contig63	.	.	-2.25081	0.0444073	NA	NA
MinimusContig_3793	.	.	-2.239	0.0396315	NA	NA
transcript-124_25496_75PE	.	.	-2.23665	0.0658579	NA	NA
transcript-124_12295_75PE|m.26309	Translocation protein SEC63 homolog;	Translocation protein SEC63 homolog;	-2.2337	0.0752799	NA	NA
MinimusContig_3001	.	.	-2.23321	0.0137195	NA	NA
MinimusContig_789	.	.	-2.23275	0.0423372	NA	NA
transcript-124_4500_75PE|m.18881	.	.	-2.2317	0.00385491	NA	NA
R1_Contig4027	.	.	-2.22906	0.0182099	NA	NA
MinimusContig_1820|m.3604	Oxysterol-binding protein-related protein 6;	Oxysterol-binding protein-related protein 6;	-2.22894	0.0720398	NA	NA
MinimusContig_2527|m.5125	Band 4.1-like protein 3;	Band 4.1-like protein 3;	-2.22321	0.0312371	NA	NA
transcript-124_13905_75PE|m.27882	Sodium- and chloride-dependent glycine transporter 2;	Sodium- and chloride-dependent glycine transporter 2;	-2.21927	0.0376903	NA	NA
transcript-124_2389_75PE|m.16627	Transcription factor IIIB 90 kDa subunit;	Transcription factor IIIB 90 kDa subunit;	-2.21903	0.0672669	NA	NA
Myt_cherry_idba_rep_c5750	.	.	-2.21828	0.0465184	NA	NA
R1_Contig1049|m.85507	Signal recognition particle subunit SRP68;	Signal recognition particle subunit SRP68;	-2.21573	0.0731671	NA	NA
Myt_cherry_idba_rep_c11091|m.92744	T-complex protein 1 subunit beta;	T-complex protein 1 subunit beta;	-2.21552	0.00675964	NA	NA
R1_Contig2615	.	.	-2.21297	0.0198591	NA	NA
MinimusContig_4920	.	.	-2.21233	0.0531728	NA	NA
MinimusContig_1684	.	.	-2.21066	0.0178727	NA	NA
transcript-124_1493_75PE|m.15771	Talin-2;	Talin-2;	-2.20858	0.0118728	NA	NA
Contig3086|m.13409	Histone deacetylase 1;	Histone deacetylase 1;	-2.20521	0.0897908	NA	NA
Myt_cherry_idba_c883|m.89928	.	.	-2.20208	0.0750565	-1.83512	0.0461014
transcript-124_3117_75PE|m.17416	.	.	-2.19797	0.00592339	NA	NA
R1_Contig651|m.85247	Centrosomal protein POC5;	.	-2.186	0.0614716	NA	NA
transcript-124_25025_75PE|m.37465	.	.	-2.18587	0.0508546	NA	NA
R1_Contig1680|m.85977	.	.	-2.17923	0.0131865	NA	NA
MinimusContig_2107|m.4204	Centrosomal protein of 112 kDa;	Centrosomal protein of 112 kDa;	-2.17687	0.0608348	NA	NA
R1_Contig3591	.	.	-2.16929	0.0316151	NA	NA
transcript-124_17390_75PE	Lysosomal aspartic protease;	.	-2.16732	0.0208666	NA	NA
R1_Contig1369	.	.	-2.16428	0.0822178	NA	NA
MinimusContig_5394|m.9611	Leucine-rich repeat LGI family member 4;	Leucine-rich repeat-containing protein 15;	-2.16358	0.0341336	NA	NA
MinimusContig_2310|m.4668	Cullin-2;	Cullin-2;	-2.16259	0.0406686	NA	NA
transcript-124_12951_75PE	.	.	-2.15714	0.00623206	NA	NA
Myt_cherry_idba_rep_c3398	.	.	-2.15657	0.0898761	NA	NA
MinimusContig_901|m.1590	.	Zinc finger protein 609 {ECO:0000312|HGNC:HGNC:29003};	-2.15218	0.0390589	NA	NA
transcript-124_4171_75PE|m.18492	.	.	-2.15072	0.0654649	NA	NA
MinimusContig_344|m.732	Fibropellin-1;	Fibropellin-1;	-2.14495	0.0295418	NA	NA
MinimusContig_5174|m.9375	Digestive cysteine proteinase 2;	Cathepsin L1;	-2.14389	0.0264728	NA	NA
R1_Contig7431	.	.	-2.14345	0.040282	NA	NA
transcript-124_4565_75PE|m.18974	von Willebrand factor A domain-containing protein 5A;	von Willebrand factor A domain-containing protein 5A;	-2.14283	0.0359289	NA	NA
MinimusContig_2486	.	.	-2.14092	0.0286614	NA	NA
MinimusContig_2581	.	.	-2.13884	0.0381674	2.51616	0.000187792
Contig2974	.	.	-2.13685	0.0769416	NA	NA
MinimusContig_7|m.13	Protein transport protein Sec16A;	Protein transport protein Sec16A;	-2.1367	0.0680605	NA	NA
MinimusContig_2694	.	.	-2.13513	0.00575718	NA	NA
transcript-124_1068_75PE	.	.	-2.13048	0.0607572	NA	NA
MinimusContig_846	.	.	-2.12742	0.0472821	NA	NA
transcript-124_9885_75PE|m.23880	.	.	-2.12133	0.0721593	NA	NA
MinimusContig_1733|m.3353	.	.	-2.11917	0.0738836	NA	NA
R1_Contig3367	.	.	-2.11361	0.0563075	2.65404	0.00188456
transcript-124_17450_75PE	.	.	-2.11324	0.0589907	NA	NA
Contig781|m.11348	Deformed epidermal autoregulatory factor 1;	Deformed epidermal autoregulatory factor 1;	-2.11114	0.0897908	2.4289	0.00422882
transcript-124_949_75PE|m.15235	Protein hunchback;	Protein hunchback;	-2.1084	0.0316151	NA	NA
transcript-124_11869_75PE|m.25854	Abscission/NoCut checkpoint regulator;	Abscission/NoCut checkpoint regulator;	-2.10376	0.0654649	NA	NA
transcript-124_956_75PE|m.15238	DmX-like protein 2;	DmX-like protein 2;	-2.09437	0.00448522	NA	NA
MinimusContig_3031	.	.	-2.09066	0.0131623	NA	NA
transcript-124_26028_75PE|m.38299	Translin-associated factor X-interacting protein 1;	Translin-associated factor X-interacting protein 1;	-2.09054	0.0701389	NA	NA
transcript-124_15408_75PE	.	.	-2.09011	0.0123055	-1.41653	0.0929727
transcript-124_33600_75PE	.	.	-2.08995	0.0489027	NA	NA
Contig980|m.11574	14-3-3 protein zeta/delta;	14-3-3 protein zeta/delta;	-2.08846	0.0909208	NA	NA
Contig1802|m.12323	1-phosphatidylinositol 4,5-bisphosphate phosphodiesterase delta-4;	1-phosphatidylinositol 4,5-bisphosphate phosphodiesterase delta-4;	-2.08736	0.0499872	NA	NA
transcript-124_733_75PE|m.15010	Nesprin-1;	Nesprin-1;	-2.07796	0.0182608	NA	NA
transcript-124_28701_75PE|m.40538	Tetratricopeptide repeat protein 28;	Tetratricopeptide repeat protein 28;	-2.0761	0.0643964	NA	NA
transcript-124_2119_75PE|m.16402	Condensin-2 complex subunit G2;	Condensin-2 complex subunit G2;	-2.07162	0.00750547	NA	NA
transcript-124_14571_75PE|m.28430	ATP-binding cassette sub-family A member 5;	ATP-binding cassette sub-family A member 5;	-2.07017	0.0867669	-1.88211	0.0275249
R1_Contig6709|m.88645	Maltase-glucoamylase, intestinal;	Maltase-glucoamylase, intestinal;	-2.06462	0.0474889	NA	NA
transcript-124_3067_75PE|m.17359	Probable phospholipid-transporting ATPase IIB;	Probable phospholipid-transporting ATPase IIB;	-2.05691	0.0241077	NA	NA
R1_Contig8596|m.89734	Polyubiquitin-B;	Polyubiquitin-B;	-2.05251	0.050661	NA	NA
transcript-124_17123_75PE	.	.	-2.05062	0.0608348	NA	NA
transcript-124_4354_75PE|m.18721	.	.	-2.04827	0.0169592	NA	NA
transcript-124_14538_75PE	.	.	-2.04159	0.00320488	NA	NA
MinimusContig_1956|m.3890	Interferon-related developmental regulator 1;	Interferon-related developmental regulator 1;	-2.0413	0.0872711	-3.34847	0.000137924
MinimusContig_2395|m.4826	.	.	-2.03609	0.0720398	NA	NA
R1_Contig4226	Villin-1;	.	-2.03552	0.042996	NA	NA
transcript-124_16193_75PE	.	.	-2.03545	0.0884794	NA	NA
transcript-124_21670_75PE	.	.	-2.03262	0.0248595	NA	NA
transcript-124_40940_75PE	.	.	-2.03199	0.0129826	NA	NA
R1_Contig1463|m.85825	.	.	-2.03125	0.0581009	1.74587	0.0472401
Contig1488	.	.	-2.0293	0.0867982	NA	NA
R1_Contig5989|m.88136	WD repeat-containing protein 93;	WD repeat-containing protein 93;	-2.02755	0.0953586	-2.10998	0.0154951
transcript-124_29950_75PE	.	.	-2.02583	0.0429038	NA	NA
MinimusContig_2770	.	.	-2.02449	0.046671	NA	NA
Myt_cherry_idba_rep_c10017	.	.	-2.02387	0.0716371	NA	NA
transcript-124_5280_75PE|m.19653	DNA repair protein complementing XP-G cells homolog;	DNA repair protein complementing XP-G cells homolog;	-2.02364	0.0155609	NA	NA
transcript-124_7615_75PE|m.21772	Rho guanine nucleotide exchange factor 16;	Rho guanine nucleotide exchange factor 16;	-2.02266	0.004041	NA	NA
transcript-124_37736_75PE|m.47638	60S ribosomal protein L27a;	60S ribosomal protein L27a;	-2.02239	0.0224043	NA	NA
R1_Contig4165	.	.	-2.01715	0.0184153	NA	NA
MinimusContig_396|m.872	DAZ-associated protein 1;	.	-2.01673	0.0651981	NA	NA
R2_Contig462	Ubiquitin-60S ribosomal protein L40;	.	-2.0161	0.0818311	NA	NA
Contig611	.	.	-2.0148	0.0622081	NA	NA
transcript-124_81820_75PE	.	.	-2.01363	0.0615053	NA	NA
transcript-124_1205_75PE	.	.	-2.01245	0.0011272	NA	NA
MinimusContig_5409	.	.	-2.01038	0.0123889	NA	NA
transcript-124_54797_75PE	.	.	-2.00667	0.0182608	NA	NA
transcript-124_35356_75PE	.	.	-2.00639	0.0722716	NA	NA
MinimusContig_887|m.1574	.	.	-2.00394	0.0321147	NA	NA
transcript-124_54152_75PE	.	.	-2.00091	0.035927	NA	NA
transcript-124_8774_75PE|m.22927	Heat shock 70 kDa protein 12B;	Heat shock 70 kDa protein 12B;	-1.99536	0.0562431	NA	NA
transcript-124_43298_75PE	.	.	-1.99221	0.015273	NA	NA
transcript-124_5174_75PE	.	.	-1.9919	0.00819987	NA	NA
R1_Contig4049	Poly [ADP-ribose] polymerase 12;	.	-1.99189	0.0751652	NA	NA
transcript-124_3547_75PE|m.17919	Stimulated by retinoic acid gene 6 protein-like {ECO:0000312|MGI:MGI:1921402};	Stimulated by retinoic acid gene 6 protein-like {ECO:0000312|MGI:MGI:1921402};	-1.98914	0.000290265	NA	NA
Contig2789|m.13153	Ubiquitin carboxyl-terminal hydrolase 25;	Ubiquitin carboxyl-terminal hydrolase 25;	-1.98628	0.0704295	NA	NA
MinimusContig_1945|m.3860	TAR DNA-binding protein 43;	TAR DNA-binding protein 43;	-1.98367	0.0952882	NA	NA
transcript-124_26583_75PE	.	.	-1.98055	0.0243676	NA	NA
transcript-124_35955_75PE|m.46238	Ryanodine receptor;	Ryanodine receptor;	-1.97823	0.0916835	NA	NA
transcript-124_86401_75PE	.	.	-1.97701	0.0854191	NA	NA
R1_Contig3870	.	.	-1.97626	0.0382303	NA	NA
transcript-124_4316_75PE|m.18689	Centrosomal protein of 290 kDa;	Centrosomal protein of 290 kDa;	-1.97378	0.0423909	NA	NA
transcript-124_1951_75PE|m.16234	Protein SCAF8;	Protein SCAF8;	-1.96336	0.0134211	NA	NA
transcript-124_42694_75PE	.	.	-1.96326	0.0329905	NA	NA
transcript-124_8523_75PE	.	.	-1.96161	0.0266726	NA	NA
MinimusContig_135|m.288	Muscle M-line assembly protein unc-89;	Muscle M-line assembly protein unc-89;	-1.95985	0.055621	NA	NA
Contig1074|m.11682	Caspase-8 {ECO:0000303|Ref.2, ECO:0000305};	Caspase-2;	-1.95819	0.0501867	NA	NA
transcript-40_1441	.	.	-1.95702	0.0700627	NA	NA
transcript-124_49900_75PE	.	.	-1.95526	0.0186622	NA	NA
transcript-124_9124_75PE|m.23217	Centrosomal protein of 135 kDa;	Centrosomal protein of 135 kDa;	-1.95487	0.0719736	NA	NA
transcript-124_10626_75PE	.	.	-1.95411	0.00304183	NA	NA
MinimusContig_2670|m.5450	Rab-like protein 6;	Rab-like protein 6;	-1.95131	0.0757377	NA	NA
R1_Contig3365|m.86953	.	.	-1.94683	0.081591	NA	NA
R1_Contig7405	.	.	-1.94259	0.015273	NA	NA
transcript-124_52255_75PE	.	.	-1.94187	0.0182708	NA	NA
MinimusContig_427	.	.	-1.93937	0.0602763	NA	NA
Contig1277|m.11868	Alpha-actinin, sarcomeric;	Alpha-actinin, sarcomeric;	-1.93528	0.0815049	NA	NA
transcript-124_16506_75PE	.	.	-1.93241	0.0288205	1.98125	0.00223863
Contig2118|m.12551	Thrombospondin-4;	Thrombospondin-4;	-1.92432	0.00701693	NA	NA
transcript-124_2173_75PE	.	.	-1.92307	0.00487646	NA	NA
transcript-30_7353|m.93311	.	.	-1.9223	0.0421749	NA	NA
transcript-124_35376_75PE|m.45816	.	.	-1.91618	0.0751652	NA	NA
R3_Contig65	.	.	-1.9138	0.0935849	NA	NA
R2_Contig13	.	.	-1.91313	0.0946002	NA	NA
transcript-124_5566_75PE	.	.	-1.91171	0.0435569	1.44898	0.0761714
R1_Contig3008	.	.	-1.90928	0.0895125	NA	NA
transcript-124_8446_75PE|m.22557	.	.	-1.90783	0.0181589	NA	NA
Myt_cherry_idba_rep_c1618	.	.	-1.90745	0.0111576	NA	NA
MinimusContig_2842	.	.	-1.90308	0.0437925	NA	NA
MinimusContig_1613|m.2994	Protocadherin-9;	Protocadherin-9;	-1.89519	0.0305997	NA	NA
transcript-124_3250_75PE	.	.	-1.88751	0.0142719	NA	NA
MinimusContig_2326	.	.	-1.88515	0.00500547	-1.21879	0.0415917
transcript-124_6229_75PE|m.20498	Protein timeless;	Protein timeless;	-1.88513	0.0366875	NA	NA
transcript-124_21131_75PE	.	.	-1.88176	0.0206945	NA	NA
transcript-124_19541_75PE	.	.	-1.88156	0.0283322	NA	NA
transcript-124_2969_75PE	.	.	-1.8769	0.0145767	NA	NA
MinimusContig_162|m.360	Cyclin-dependent kinase-like 5;	Cyclin-dependent kinase-like 5;	-1.87244	0.0556312	-2.03093	0.00829639
Contig1168	.	.	-1.8704	0.0544423	NA	NA
R1_Contig2275|m.86409	Scavenger receptor class F member 2;	Scavenger receptor class F member 2;	-1.86868	0.00629006	NA	NA
transcript-124_11680_75PE	.	.	-1.86546	0.0283322	NA	NA
transcript-50_3135	.	.	-1.86402	0.0894958	NA	NA
Myt_cherry_idba_rep_c9274|m.92204	Protein still life, isoforms C/SIF type 2;	Protein still life, isoforms C/SIF type 2;	-1.86106	0.0290403	NA	NA
transcript-124_6573_75PE|m.20831	Rho guanine nucleotide exchange factor 39;	Rho guanine nucleotide exchange factor 39;	-1.8597	0.0438877	NA	NA
Contig2449|m.12826	Eukaryotic translation initiation factor 4 gamma 3;	Eukaryotic translation initiation factor 4 gamma 3;	-1.85777	0.0193994	-1.30724	0.059613
Contig3239|m.13536	Basement membrane-specific heparan sulfate proteoglycan core protein;	Basement membrane-specific heparan sulfate proteoglycan core protein;	-1.85574	0.0210308	NA	NA
MinimusContig_174|m.393	.	.	-1.85343	0.0125566	NA	NA
MinimusContig_2849|m.5834	von Willebrand factor A domain-containing protein 3A;	von Willebrand factor A domain-containing protein 3A;	-1.85263	0.0729098	NA	NA
transcript-124_14287_75PE	.	.	-1.85203	0.0704964	NA	NA
MinimusContig_2697	.	.	-1.84842	0.0739703	NA	NA
transcript-124_39445_75PE|m.48881	Adiponectin receptor protein;	Adiponectin receptor protein;	-1.84832	0.0240414	NA	NA
transcript-124_88247_75PE	.	.	-1.84734	0.0343606	-1.28593	0.0967892
R1_Contig1361	.	.	-1.84657	0.0375095	NA	NA
MinimusContig_80	.	.	-1.84431	0.0135036	NA	NA
transcript-124_2844_75PE	.	.	-1.84401	0.0916754	NA	NA
MinimusContig_3948	.	.	-1.84144	0.0106115	NA	NA
MinimusContig_470	.	.	-1.84037	0.0520406	NA	NA
MinimusContig_3|m.4	Obscurin {ECO:0000250|UniProtKB:A2AAJ9};	Obscurin {ECO:0000250|UniProtKB:A2AAJ9};	-1.83972	0.0267548	-1.40612	0.0457979
R1_Contig3144	.	.	-1.83775	0.0888685	NA	NA
transcript-124_25857_75PE	.	.	-1.83757	0.0527383	NA	NA
MinimusContig_3965	.	.	-1.8365	0.0445387	NA	NA
R1_Contig7339	Glutamine-rich protein 1;	.	-1.83396	0.0261287	NA	NA
transcript-124_4886_75PE|m.19260	Cytosolic phospholipase A2;	Cytosolic phospholipase A2;	-1.8331	0.0650486	NA	NA
MinimusContig_1633|m.3034	Mitogen-activated protein kinase kinase kinase 9;	Mitogen-activated protein kinase kinase kinase 10;	-1.83187	0.0664464	NA	NA
R1_Contig375|m.85086	Roundabout homolog 2;	Roundabout homolog 2;	-1.83048	0.0396564	NA	NA
transcript-124_12518_75PE|m.26504	RNA pseudouridylate synthase domain-containing protein 2;	RNA pseudouridylate synthase domain-containing protein 2;	-1.82879	0.0972739	NA	NA
MinimusContig_3283	.	.	-1.82811	0.0159618	NA	NA
transcript-124_50664_75PE	40S ribosomal protein S21;	.	-1.82763	0.0753234	NA	NA
transcript-124_6703_75PE	.	.	-1.82355	0.017195	NA	NA
transcript-124_7438_75PE|m.21632	LysM and putative peptidoglycan-binding domain-containing protein 3;	LysM and putative peptidoglycan-binding domain-containing protein 3;	-1.82224	0.0251285	NA	NA
transcript-124_1433_75PE	.	.	-1.82076	0.0144326	NA	NA
transcript-124_43252_75PE	.	.	-1.81603	0.0720035	NA	NA
transcript-124_20693_75PE	.	.	-1.81395	0.0246106	NA	NA
R1_Contig2461	.	.	-1.81307	0.0367872	NA	NA
transcript-124_20584_75PE	.	.	-1.81005	0.0635121	NA	NA
R1_Contig2132|m.86320	Apoptosis-stimulating of p53 protein 1;	Apoptosis-stimulating of p53 protein 1;	-1.8079	0.0639949	-1.68725	0.0194433
transcript-124_73169_75PE	.	.	-1.8063	0.0790334	NA	NA
transcript-124_8450_75PE|m.22560	.	.	-1.79936	0.0458942	NA	NA
transcript-124_29988_75PE	.	.	-1.79869	0.0284854	NA	NA
R1_Contig6696|m.88632	.	.	-1.79339	0.0713589	NA	NA
Contig2903|m.13257	60S ribosomal protein L10;	60S ribosomal protein L10;	-1.7927	0.0339242	NA	NA
transcript-124_3751_75PE	.	.	-1.7897	0.0625032	NA	NA
R1_Contig5910|m.88071	Beta-galactosidase;	Beta-galactosidase;	-1.7861	0.0360268	NA	NA
MinimusContig_155	.	.	-1.78108	0.0683834	NA	NA
transcript-124_15175_75PE	.	.	-1.7792	0.0961578	NA	NA
transcript-124_7646_75PE	.	.	-1.77337	0.0296913	NA	NA
Contig525	.	.	-1.77258	0.0560108	NA	NA
transcript-124_4024_75PE|m.18356	Cullin-3-A;	Cullin-3-A;	-1.77162	0.0189411	NA	NA
MinimusContig_396|m.871	DAZ-associated protein 1;	Heterogeneous nuclear ribonucleoprotein 27C;	-1.76784	0.0880553	NA	NA
transcript-124_10945_75PE|m.24990	Phosphoinositide 3-kinase adapter protein 1;	Phosphoinositide 3-kinase adapter protein 1;	-1.76772	0.0754006	NA	NA
transcript-124_5079_75PE|m.19430	.	.	-1.76687	0.0494741	NA	NA
MinimusContig_1374|m.2123	.	.	-1.75625	0.0230393	NA	NA
MinimusContig_5379	.	.	-1.75615	0.0496261	NA	NA
transcript-124_2745_75PE|m.17064	Acylcarnitine hydrolase;	Acylcarnitine hydrolase;	-1.75022	0.0681221	NA	NA
Contig191|m.10623	Phosphatase and actin regulator 1;	Phosphatase and actin regulator 1;	-1.74721	0.0908593	NA	NA
R1_Contig1754	.	.	-1.74415	0.0243354	NA	NA
MinimusContig_3384	.	.	-1.74352	0.0376318	NA	NA
transcript-124_12723_LongLar8	.	.	-1.74277	0.0183134	NA	NA
transcript-124_5666_75PE	.	.	-1.74172	0.0985993	NA	NA
MinimusContig_1472	.	.	-1.73844	0.049703	NA	NA
MinimusContig_1586|m.2930	Serine/threonine-protein kinase Nek4;	Serine/threonine-protein kinase Nek4;	-1.73616	0.00592339	NA	NA
transcript-124_36273_75PE	.	.	-1.73158	0.0655754	NA	NA
transcript-124_32365_75PE|m.43475	Hatching enzyme;	Hatching enzyme;	-1.72441	0.0646651	NA	NA
transcript-124_18151_75PE|m.31674	Origin recognition complex subunit 1;	Origin recognition complex subunit 1;	-1.72351	0.0935849	NA	NA
R1_Contig6002	.	.	-1.72232	0.0242583	NA	NA
Myt_cherry_idba_c7411	.	.	-1.72069	0.0429779	NA	NA
transcript-124_14662_75PE|m.28498	Leukocyte receptor cluster member 9;	Leukocyte receptor cluster member 9;	-1.71997	0.0726484	NA	NA
transcript-124_13185_75PE	.	.	-1.71965	0.0699104	NA	NA
transcript-124_10122_75PE	.	.	-1.71803	0.0505419	NA	NA
transcript-124_16254_75PE|m.29928	Alpha-(1,3)-fucosyltransferase 7;	Alpha-(1,3)-fucosyltransferase 7;	-1.71764	0.0729098	1.42973	0.0297603
MinimusContig_1173|m.1771	Reticulon-4 receptor-like 2;	Reticulon-4 receptor-like 2;	-1.71075	0.0812587	NA	NA
transcript-124_6567_75PE	.	.	-1.71022	0.0243447	NA	NA
MinimusContig_1452|m.2403	Acetyl-CoA carboxylase;	Acetyl-CoA carboxylase;	-1.70959	0.0353717	NA	NA
MinimusContig_3428	.	.	-1.70236	0.0962569	1.47298	0.0806047
transcript-124_38350_75PE|m.48107	.	.	-1.70136	0.0244887	NA	NA
transcript-124_2910_LongLar8	.	.	-1.69957	0.0634076	NA	NA
transcript-124_12325_75PE	.	.	-1.69621	0.0686521	NA	NA
transcript-124_31500_75PE	.	.	-1.68963	0.0931435	NA	NA
transcript-124_767_75PE	.	.	-1.67957	0.00494238	NA	NA
MinimusContig_2020|m.4018	.	.	-1.6768	0.0208012	NA	NA
MinimusContig_3540	.	.	-1.67594	0.0560981	NA	NA
Contig497	.	.	-1.67406	0.0518419	NA	NA
MinimusContig_240|m.516	.	.	-1.67162	0.0367848	NA	NA
transcript-124_5159_75PE|m.19492	Serine/threonine-protein kinase RIO3;	Serine/threonine-protein kinase RIO3;	-1.66868	0.0374941	NA	NA
R1_Contig8269	.	.	-1.66852	0.0875557	NA	NA
transcript-124_15051_75PE	.	.	-1.66675	0.0718121	NA	NA
Contig3542|m.13775	Collagen alpha-4(VI) chain;	Collagen alpha-4(VI) chain;	-1.65971	0.0247509	NA	NA
transcript-124_3734_75PE|m.18057	CD109 antigen;	CD109 antigen;	-1.65959	0.0634513	NA	NA
R1_Contig4640	.	.	-1.6585	0.0656626	NA	NA
R1_Contig5311	.	.	-1.65808	0.0240414	NA	NA
Contig2890|m.13249	Endoplasmin {ECO:0000250|UniProtKB:P08113};	Endoplasmin {ECO:0000250|UniProtKB:P08113};	-1.65606	0.098176	NA	NA
MinimusContig_1423|m.2314	Kelch-like ECH-associated protein 1;	Kelch-like ECH-associated protein 1;	-1.65407	0.0709366	NA	NA
transcript-124_4739_75PE|m.19139	Contactin-associated protein-like 2;	Contactin-associated protein like 5-2;	-1.65116	0.0461144	-1.2148	0.0507268
transcript-124_25624_75PE	.	.	-1.64893	0.0714201	NA	NA
transcript-124_27326_75PE	.	.	-1.64723	0.0363223	NA	NA
MinimusContig_3135	.	.	-1.64667	0.0858582	NA	NA
MinimusContig_2334	.	.	-1.64225	0.0498149	NA	NA
R1_Contig4916	.	.	-1.64185	0.0928792	NA	NA
Myt_cherry_idba_rep_c5961|m.91207	Inhibin beta B chain;	Inhibin beta B chain;	-1.63886	0.0719736	NA	NA
MinimusContig_5560	.	.	-1.63855	0.00046267	NA	NA
R1_Contig5202	.	.	-1.63843	0.0796205	NA	NA
MinimusContig_2523	.	.	-1.63807	0.0474134	NA	NA
transcript-124_18982_75PE	.	.	-1.63206	0.0383884	NA	NA
MinimusContig_120|m.249	Protein dispatched homolog 1;	Protein dispatched homolog 1;	-1.629	0.092308	NA	NA
Myt_cherry_idba_rep_c4238	.	.	-1.6285	0.0622081	NA	NA
transcript-124_7054_75PE	.	.	-1.62321	0.046675	NA	NA
transcript-124_2137_75PE|m.16417	Protein PIF;	Protein PIF;	-1.61963	0.0207365	NA	NA
transcript-124_14686_75PE	.	.	-1.61379	0.0264283	NA	NA
MinimusContig_2293	.	.	-1.61345	0.0720398	NA	NA
Contig3203|m.13497	Peroxisomal membrane protein PEX13;	Peroxisomal membrane protein PEX13;	-1.61241	0.0428959	NA	NA
transcript-124_19976_75PE|m.33181	F-box/WD repeat-containing protein lin-23;	F-box/WD repeat-containing protein lin-23;	-1.60622	0.069499	NA	NA
transcript-124_1870_75PE	Transmembrane protein 41B;	.	-1.59982	0.0806333	NA	NA
MinimusContig_2630	.	.	-1.59586	0.0527144	NA	NA
MinimusContig_1489|m.2504	Deleted in lung and esophageal cancer protein 1;	Deleted in lung and esophageal cancer protein 1;	-1.59284	0.0127789	NA	NA
transcript-124_1970_75PE|m.16260	Ubiquitin carboxyl-terminal hydrolase 19;	Ubiquitin carboxyl-terminal hydrolase 19;	-1.59233	0.0687311	NA	NA
transcript-124_1869_75PE|m.16096	.	.	-1.59211	0.0348278	NA	NA
Myt_cherry_idba_rep_c6770|m.91438	.	.	-1.5921	0.0891926	NA	NA
MinimusContig_3010|m.6157	Cytochrome P450 3A13;	Cytochrome P450 3A13;	-1.59088	0.0758348	1.49206	0.0638225
Contig940	.	.	-1.58929	0.052932	NA	NA
MinimusContig_1792|m.3519	Nucleoprotein TPR;	Nucleoprotein TPR;	-1.58814	0.0927314	NA	NA
transcript-124_4989_75PE	.	.	-1.58687	0.0347477	NA	NA
transcript-124_5180_75PE	.	.	-1.57469	0.0188239	NA	NA
transcript-124_2299_75PE|m.16536	E3 ubiquitin-protein ligase RNF31;	E3 ubiquitin-protein ligase RNF31;	-1.57374	0.0388435	NA	NA
transcript-124_8435_75PE	.	.	-1.57168	0.050661	NA	NA
transcript-124_7420_75PE	.	.	-1.56104	0.0853481	NA	NA
R1_Contig5177|m.87718	Peroxidasin;	Peroxidasin;	-1.55648	0.0429779	NA	NA
R1_Contig3043	.	.	-1.54367	0.0719736	-1.40579	0.0162158
MinimusContig_2260	.	.	-1.53953	0.0823313	NA	NA
transcript-124_8581_75PE	.	.	-1.53898	0.0950401	NA	NA
transcript-124_6569_75PE|m.20828	Rho family-interacting cell polarization regulator 2 {ECO:0000250|UniProtKB:Q9Y4F9};	Rho family-interacting cell polarization regulator 2 {ECO:0000250|UniProtKB:Q9Y4F9};	-1.53836	0.0962981	NA	NA
transcript-124_10989_75PE	.	.	-1.53645	0.0261287	NA	NA
MinimusContig_183|m.401	Dynein heavy chain 5, axonemal;	Dynein heavy chain 5, axonemal;	-1.53532	0.0315476	NA	NA
Contig2617	.	.	-1.5282	0.0256373	NA	NA
transcript-124_5831_75PE|m.20169	.	.	-1.52062	0.0622081	NA	NA
transcript-124_33255_75PE	.	.	-1.51405	0.0941179	NA	NA
transcript-124_689_75PE|m.14969	BPTI/Kunitz domain-containing protein {ECO:0000303|PubMed:21050442};	Boophilin-H2;	-1.51256	0.00872215	NA	NA
MinimusContig_2463|m.4985	Poly [ADP-ribose] polymerase 14;	Poly [ADP-ribose] polymerase 14;	-1.50626	0.0363223	NA	NA
Contig3346	.	.	-1.50443	0.0256373	NA	NA
MinimusContig_1928	.	.	-1.50368	0.0757377	NA	NA
Contig3334|m.13607	Focal adhesion kinase 1;	Focal adhesion kinase 1;	-1.49987	0.0253059	NA	NA
transcript-124_18075_75PE|m.31611	.	.	-1.49795	0.0956656	NA	NA
MinimusContig_2897	.	.	-1.4898	0.0574574	NA	NA
transcript-124_25065_75PE	.	.	-1.48223	0.0924645	NA	NA
transcript-124_4672_75PE	.	.	-1.48138	0.0755646	NA	NA
transcript-124_27524_75PE	.	.	-1.47933	0.0996988	NA	NA
R3_Contig43|m.84514	E3 ubiquitin-protein ligase TRIM33;	E3 ubiquitin-protein ligase TRIM33;	-1.47178	0.0336702	NA	NA
Contig784	.	.	-1.46894	0.0117949	NA	NA
transcript-124_8219_75PE|m.22381	Dual oxidase maturation factor 1;	Dual oxidase maturation factor 1;	-1.4689	0.0921463	NA	NA
R1_Contig3369	.	.	-1.46072	0.0574574	NA	NA
MinimusContig_4343	.	.	-1.45852	0.0689744	NA	NA
MinimusContig_1753	.	.	-1.45779	0.0429652	NA	NA
MinimusContig_2700	.	.	-1.45509	0.0264728	NA	NA
Myt_cherry_idba_rep_c8916	.	.	-1.44295	0.0129531	NA	NA
Contig3232	.	.	-1.43837	0.0416069	NA	NA
transcript-124_13950_75PE	.	.	-1.43639	0.0902575	NA	NA
transcript-124_24489_75PE|m.36972	Replication protein A 70 kDa DNA-binding subunit;	Replication protein A 70 kDa DNA-binding subunit;	-1.43501	0.0463769	NA	NA
transcript-124_12394_75PE|m.26359	.	.	-1.42698	0.0720214	NA	NA
transcript-124_35489_75PE|m.45904	.	.	-1.42022	0.0544423	NA	NA
transcript-124_24489_75PE|m.36973	Replication protein A 70 kDa DNA-binding subunit;	.	-1.39838	0.0366761	NA	NA
transcript-124_33175_75PE	.	.	-1.3954	0.0757974	NA	NA
transcript-124_843_75PE|m.15147	.	.	-1.37214	0.0759406	NA	NA
MinimusContig_2915	.	.	-1.36303	0.0584329	NA	NA
transcript-124_2823_75PE|m.17121	Spindle and centriole-associated protein 1;	Spindle and centriole-associated protein 1;	-1.35679	0.0919002	NA	NA
transcript-124_67097_75PE	.	.	-1.35341	0.00728944	NA	NA
MinimusContig_862|m.1536	Pre-mRNA-splicing factor 38B;	Pre-mRNA-splicing factor 38B;	-1.34576	0.078264	NA	NA
MinimusContig_883	.	.	-1.3424	0.085531	NA	NA
transcript-124_1948_75PE	.	.	-1.28317	0.0385775	NA	NA
R1_Contig6945	.	.	-1.27899	0.095716	NA	NA
Contig2425	.	.	-1.26498	0.0754006	NA	NA
transcript-124_27865_75PE	.	.	-1.24787	0.0989848	NA	NA
Contig276	.	.	-1.2201	0.0244417	NA	NA
transcript-124_1153_75PE|m.15457	.	.	-1.20392	0.0853481	NA	NA
MinimusContig_255	.	.	1.26471	0.0966375	NA	NA
MinimusContig_172	.	.	1.29341	0.0880969	NA	NA
transcript-124_3909_75PE|m.18213	Zinc finger B-box domain-containing protein 1;	Zinc finger B-box domain-containing protein 1;	1.35004	0.0704964	NA	NA
transcript-124_1633_LongLar8	.	.	1.35121	0.0703629	NA	NA
transcript-124_5426_75PE	.	.	1.36009	0.0540298	NA	NA
transcript-124_648_75PE|m.14907	.	.	1.36591	0.0472114	NA	NA
transcript-124_19673_75PE	.	.	1.40205	0.0643964	NA	NA
R1_Contig4708	.	.	1.42088	0.0955997	NA	NA
transcript-124_35728_75PE	.	.	1.42625	0.0765221	NA	NA
transcript-124_1248_75PE|m.15539	.	.	1.43875	0.0683067	NA	NA
transcript-124_4931_75PE	.	.	1.45869	0.0441094	NA	NA
transcript-124_43718_75PE	.	.	1.46304	0.0790334	NA	NA
transcript-124_42246_75PE|m.51023	.	.	1.47444	0.0859606	NA	NA
MinimusContig_1866|m.3707	Transmembrane and coiled-coil domain-containing protein 4;	Transmembrane and coiled-coil domain-containing protein 4;	1.48152	0.0862219	NA	NA
transcript-124_29798_75PE	.	.	1.4943	0.0874885	NA	NA
MinimusContig_15|m.34	SMC5-SMC6 complex localization factor protein 2 {ECO:0000250|UniProtKB:Q8IX21};	SMC5-SMC6 complex localization factor protein 2 {ECO:0000312|HGNC:HGNC:17814};	1.5162	0.0964006	NA	NA
MinimusContig_780	.	.	1.52964	0.0926161	NA	NA
MinimusContig_3080	.	.	1.53863	0.081591	NA	NA
transcript-124_29243_75PE	.	.	1.53892	0.0782612	NA	NA
transcript-124_4288_75PE	.	.	1.54052	0.05117	NA	NA
MinimusContig_1590	.	.	1.56851	0.058934	NA	NA
MinimusContig_1036	.	.	1.57265	0.0526539	NA	NA
transcript-124_8406_75PE|m.22517	Serine/threonine-protein kinase minibrain;	Dual specificity tyrosine-phosphorylation-regulated kinase 1A;	1.57594	0.0661052	NA	NA
transcript-124_4544_LongLar8	.	.	1.5842	0.0397755	NA	NA
transcript-124_10319_75PE	.	.	1.58627	0.0989872	NA	NA
transcript-124_32624_75PE	.	.	1.59183	0.0922496	NA	NA
transcript-124_8623_75PE	.	.	1.5988	0.0116313	NA	NA
Contig2633|m.12994	Lysine-specific demethylase 3B;	Lysine-specific demethylase 3B;	1.59967	0.0927314	NA	NA
transcript-124_563_75PE|m.14796	DNA polymerase alpha catalytic subunit;	DNA polymerase alpha catalytic subunit;	1.60392	0.0306199	-1.72231	0.00433263
transcript-124_638_75PE|m.14897	Zinc finger protein 737;	Zinc finger protein 91;	1.60438	0.0296913	NA	NA
R1_Contig3730	.	.	1.6095	0.0826439	NA	NA
R1_Contig5094|m.87693	60S ribosomal protein L7;	60S ribosomal protein L7;	1.63133	0.0553425	NA	NA
MinimusContig_2845	.	.	1.64491	0.0751652	NA	NA
MinimusContig_321|m.700	Double-stranded RNA-binding protein Staufen homolog {ECO:0000305};	Double-stranded RNA-binding protein Staufen homolog {ECO:0000305};	1.64847	0.0511453	NA	NA
MinimusContig_2514	.	.	1.64961	0.0472821	NA	NA
transcript-124_3894_75PE|m.18205	Uncharacterized protein KIAA2012 homolog {ECO:0000305};	Uncharacterized protein KIAA2012 homolog {ECO:0000305};	1.65169	0.0809021	NA	NA
Myt_cherry_idba_rep_c12127	.	.	1.65256	0.0956573	NA	NA
MinimusContig_1513|m.2577	Chromatin assembly factor 1 subunit A;	Chromatin assembly factor 1 subunit A;	1.66003	0.0861711	2.06054	0.00626462
MinimusContig_717|m.1385	Putative epidermal cell surface receptor;	Putative epidermal cell surface receptor;	1.6729	0.0255767	NA	NA
R1_Contig8288	.	.	1.68239	0.0501068	NA	NA
MinimusContig_3951	.	.	1.68484	0.056861	NA	NA
transcript-124_56768_75PE	.	.	1.68538	0.0847349	NA	NA
transcript-124_24778_75PE	.	.	1.69002	0.0561092	NA	NA
Contig2753	.	.	1.69814	0.0934408	NA	NA
Contig22_capround1|m.10391	Apolipophorins;	Apolipophorins;	1.70121	0.0973465	NA	NA
transcript-124_6265_75PE|m.20541	Activating signal cointegrator 1 complex subunit 2;	Activating signal cointegrator 1 complex subunit 2;	1.70453	0.0315678	NA	NA
R1_Contig3664	.	.	1.70851	0.0962504	NA	NA
transcript-124_29635_75PE|m.41296	.	.	1.7088	0.0504678	NA	NA
MinimusContig_2058|m.4100	Patched domain-containing protein 3;	Patched domain-containing protein 3;	1.71216	0.0889224	NA	NA
MinimusContig_3673	.	.	1.7224	0.0592019	1.25468	0.0884596
transcript-124_4554_75PE|m.18954	Ankyrin repeat and zinc finger domain-containing protein 1;	Ankyrin repeat and zinc finger domain-containing protein 1;	1.7263	0.0708844	NA	NA
transcript-124_9811_75PE	.	.	1.73194	0.0508452	NA	NA
transcript-124_6644_75PE|m.20881	.	.	1.73958	0.0701966	NA	NA
transcript-124_3253_75PE|m.17550	PH-interacting protein;	PH-interacting protein;	1.74272	0.0579341	NA	NA
Myt_cherry_idba_rep_c5016	.	.	1.74663	0.0499872	NA	NA
R1_Contig5178	.	.	1.753	0.0658579	NA	NA
R1_Contig6741	.	.	1.75922	0.0132527	1.33177	0.0185519
R1_Contig3343	.	.	1.76087	0.0257034	NA	NA
MinimusContig_527|m.1132	Protocadherin-9;	Protocadherin-9;	1.76969	0.0455395	NA	NA
Contig926	.	.	1.77901	0.0719736	NA	NA
transcript-124_22_LongLar8	.	.	1.78009	0.028284	NA	NA
R1_Contig202|m.84984	Chaperone protein DnaJ {ECO:0000255|HAMAP-Rule:MF_01152};	DnaJ homolog subfamily B member 14;	1.78165	0.0875557	NA	NA
Contig382|m.10889	Dystonin;	Microtubule-actin cross-linking factor 1;	1.78401	0.0482736	NA	NA
transcript-124_12461_75PE|m.26438	Acetylcholine receptor subunit alpha-like 2;	Acetylcholine receptor subunit alpha-like 2;	1.78867	0.0213093	NA	NA
MinimusContig_2062|m.4106	WD repeat-containing protein 35;	WD repeat-containing protein 35;	1.79146	0.0544449	-1.68215	0.0231027
MinimusContig_1368	.	.	1.7928	0.0286614	-1.95354	0.00213811
transcript-124_26113_75PE	.	.	1.79991	0.0132735	NA	NA
transcript-124_10408_75PE|m.24409	Heterogeneous nuclear ribonucleoprotein H2;	Heterogeneous nuclear ribonucleoprotein H;	1.80105	0.0288205	NA	NA
transcript-124_43661_75PE|m.52129	.	Eukaryotic translation initiation factor 5B;	1.804	0.0843121	NA	NA
transcript-124_9923_75PE	.	.	1.8046	0.0773303	NA	NA
MinimusContig_1638	.	.	1.80462	0.0229033	1.20856	0.0780518
R2_Contig178|m.84639	Extracellular serine/threonine protein kinase FAM20C {ECO:0000305};	Extracellular serine/threonine protein kinase FAM20C {ECO:0000305};	1.80991	0.0868169	NA	NA
MinimusContig_129	.	.	1.81175	0.0215487	NA	NA
MinimusContig_2709|m.5519	.	.	1.82977	0.0659542	NA	NA
transcript-124_52043_75PE	.	.	1.83391	0.0847834	NA	NA
R2_Contig463	.	.	1.83507	0.0597485	NA	NA
R1_Contig6791|m.88718	Transcription intermediary factor 1-alpha;	Transcription intermediary factor 1-alpha;	1.84533	0.0385775	NA	NA
transcript-124_1893_75PE|m.16139	Transmembrane protein 131;	Transmembrane protein 131;	1.84981	0.0130067	NA	NA
R1_Contig35|m.84879	Tubulin alpha-1 chain;	Tubulin alpha-1C chain;	1.85585	0.0285219	NA	NA
transcript-124_12469_75PE	.	.	1.86088	0.0647819	NA	NA
MinimusContig_3987	.	.	1.86988	0.0785826	NA	NA
transcript-124_3375_75PE|m.17667	Protein split ends;	Protein split ends;	1.87012	0.0246989	NA	NA
Contig684|m.11234	.	.	1.87027	0.0499872	NA	NA
MinimusContig_582|m.1215	TRAF3-interacting protein 1;	TRAF3-interacting protein 1;	1.87062	0.0457036	NA	NA
Contig286|m.10751	Nuclear factor NF-kappa-B p105 subunit;	Nuclear factor NF-kappa-B p105 subunit;	1.87402	0.0995037	1.69559	0.0441529
Myt_cherry_idba_rep_c9756|m.92335	Nuclear pore complex protein Nup133;	Nuclear pore complex protein Nup133;	1.88374	0.0126509	NA	NA
R1_Contig2793	.	.	1.89234	0.0616481	1.78414	0.0220585
Contig416|m.10935	Transmembrane protein 232;	Transmembrane protein 232;	1.89615	0.054557	NA	NA
R1_Contig4868	.	.	1.89953	0.0286966	NA	NA
transcript-124_25436_75PE	.	.	1.90533	0.0256594	NA	NA
transcript-124_7354_75PE|m.21575	Ankyrin-3;	Ankyrin-3;	1.91576	0.0240414	NA	NA
transcript-124_2990_75PE|m.17243	Splicing factor 3B subunit 1;	Splicing factor 3B subunit 1;	1.9189	0.0903934	NA	NA
transcript-124_3445_75PE|m.17780	Probable RNA-binding protein 19;	Probable RNA-binding protein 19;	1.91986	0.0554833	NA	NA
MinimusContig_3656	.	.	1.92528	0.00323502	NA	NA
R1_Contig6475	.	.	1.93043	0.09708	NA	NA
transcript-124_28367_75PE|m.40222	.	.	1.93301	0.0472821	NA	NA
R1_Contig5687	.	.	1.93404	0.0444811	NA	NA
Contig3140	.	.	1.93869	0.0721593	NA	NA
MinimusContig_1289|m.1839	Sortilin;	Sortilin;	1.94415	0.0689347	NA	NA
MinimusContig_193|m.442	Coiled-coil domain-containing protein 66;	Coiled-coil domain-containing protein 66;	1.94504	0.0695522	NA	NA
transcript-124_54089_75PE	.	.	1.94548	0.0363223	NA	NA
R2_Contig308	.	.	1.9457	0.0145767	NA	NA
R1_Contig4682	.	.	1.94873	0.0451316	1.70301	0.033249
transcript-124_13754_75PE|m.27740	.	.	1.94957	0.025066	NA	NA
transcript-124_40593_75PE	.	.	1.95078	0.0296947	NA	NA
Contig3324|m.13598	.	Zinc finger Y-chromosomal protein;	1.95434	0.0721593	-1.47646	0.0854863
Myt_cherry_idba_rep_c4205|m.90578	Eukaryotic translation initiation factor 3 subunit H {ECO:0000255|HAMAP-Rule:MF_03007};	Eukaryotic translation initiation factor 3 subunit H {ECO:0000255|HAMAP-Rule:MF_03007};	1.95538	0.0924762	NA	NA
MinimusContig_1445|m.2394	Serine/threonine-protein kinase unc-51;	Serine/threonine-protein kinase ULK2;	1.95693	0.00614121	NA	NA
transcript-124_8457_LongLar8	Endoplasmin;	.	1.96443	0.000770277	NA	NA
transcript-124_7425_75PE|m.21613	.	.	1.97071	0.086805	NA	NA
R1_Contig7230	.	.	1.97084	0.0518419	NA	NA
R1_Contig7606	.	.	1.97127	0.0660386	NA	NA
R1_Contig6742	.	.	1.97168	0.0996236	NA	NA
R1_Contig5228	.	.	1.97248	0.0349894	NA	NA
R3_Contig54|m.84516	Receptor expression-enhancing protein 5;	Receptor expression-enhancing protein 5;	1.97264	0.0815043	NA	NA
MinimusContig_4656	.	.	1.97414	0.00914861	NA	NA
Myt_cherry_idba_rep_c563	.	.	1.97423	0.0655754	NA	NA
transcript-124_597_75PE	.	.	1.98131	0.00867862	1.73728	0.00390093
transcript-124_5073_75PE	.	.	1.98157	0.0179204	NA	NA
Contig630	.	.	1.98301	0.0647819	NA	NA
transcript-124_4161_75PE|m.18491	Zinc finger protein PLAG1;	Zinc finger protein PLAG1;	1.98777	0.0337198	NA	NA
transcript-124_41211_75PE	.	.	1.98859	0.0146999	NA	NA
transcript-124_5917_75PE	.	.	1.98891	0.0385775	NA	NA
Myt_cherry_idba_rep_c7664|m.91767	Retinol dehydrogenase 13;	Retinol dehydrogenase 13;	1.99552	0.0796205	NA	NA
transcript-124_42699_75PE|m.51402	Cartilage acidic protein 1;	Cartilage acidic protein 1;	1.99754	0.0964006	NA	NA
transcript-124_5086_75PE|m.19435	Zinc finger protein Xfin;	Zinc finger protein Xfin;	2.00329	0.0996236	NA	NA
transcript-124_2295_75PE	.	.	2.00355	0.00875268	NA	NA
Contig151|m.10566	BAH and coiled-coil domain-containing protein 1;	BAH and coiled-coil domain-containing protein 1;	2.00407	0.0306199	NA	NA
transcript-124_8043_LongLar8	.	.	2.00801	0.0680605	NA	NA
transcript-124_21589_75PE|m.34456	TAF6-like RNA polymerase II p300/CBP-associated factor-associated factor 65 kDa subunit 6L;	TAF6-like RNA polymerase II p300/CBP-associated factor-associated factor 65 kDa subunit 6L;	2.01331	0.0342907	NA	NA
transcript-124_11264_75PE|m.25293	NSFL1 cofactor p47;	NSFL1 cofactor p47;	2.01371	0.0684329	NA	NA
transcript-124_14435_75PE	.	.	2.01673	0.0246559	NA	NA
Contig435|m.10963	Acidic mammalian chitinase;	Acidic mammalian chitinase;	2.01678	0.0424747	2.96917	2.68085e-05
Contig323|m.10800	Formin-binding protein 4;	Formin-binding protein 4;	2.01778	0.0755646	NA	NA
Contig75_capround1|m.10447	.	.	2.01864	0.0575266	-1.61582	0.0698763
transcript-124_10230_75PE|m.24249	.	.	2.02592	0.0444073	NA	NA
MinimusContig_2002|m.3985	.	.	2.02837	0.075591	-2.55793	0.00422882
R1_Contig8153	.	.	2.03057	0.0745502	NA	NA
transcript-124_31331_75PE	.	.	2.03132	0.0306199	NA	NA
R1_Contig84|m.84910	Tubulin alpha-1 chain;	Tubulin alpha-1C chain;	2.0426	0.0612656	NA	NA
transcript-124_5036_75PE	.	.	2.04514	0.0132482	NA	NA
Contig2611|m.12969	.	Otopetrin-2;	2.04568	0.0153254	NA	NA
transcript-124_22459_75PE	.	.	2.04596	0.0508452	NA	NA
transcript-124_1824_75PE|m.16061	.	.	2.0488	0.0879482	NA	NA
R1_Contig6462|m.88396	Tektin-4;	Tektin-4;	2.0519	0.0856536	NA	NA
MinimusContig_1742|m.3395	Nuclear pore complex protein Nup98-Nup96;	Nuclear pore complex protein Nup98-Nup96;	2.05227	0.0416069	-2.68389	0.000382011
transcript-124_11363_LongLar8	.	.	2.05797	0.000163069	NA	NA
R1_Contig2756	.	.	2.05892	0.0183053	NA	NA
R3_Contig71	.	.	2.05933	0.0437925	NA	NA
transcript-124_1378_75PE|m.15664	S phase cyclin A-associated protein in the endoplasmic reticulum;	S phase cyclin A-associated protein in the endoplasmic reticulum;	2.06256	0.0796205	-1.62473	0.0973461
MinimusContig_537|m.1153	Tubulin alpha-3 chain;	Tubulin alpha-1 chain;	2.06628	0.0719736	NA	NA
R1_Contig2687	.	.	2.06903	0.0272979	-2.25355	0.00250271
transcript-124_16388_75PE	.	.	2.08463	0.0215487	NA	NA
R1_Contig5101	.	.	2.09165	0.0699944	NA	NA
R1_Contig6165	.	.	2.092	0.0573271	NA	NA
transcript-124_25045_75PE	.	.	2.09258	0.0765221	NA	NA
R1_Contig6788	.	.	2.09775	0.0244441	NA	NA
R1_Contig4178	.	.	2.0978	0.0713746	2.37368	0.0130241
MinimusContig_469	.	.	2.09946	0.00322267	NA	NA
MinimusContig_1689	.	.	2.10074	0.00181767	NA	NA
R1_Contig830|m.85362	DNA polymerase delta subunit 3;	DNA polymerase delta subunit 3;	2.10343	0.0296913	NA	NA
transcript-124_21836_75PE|m.34641	.	.	2.10359	0.0898761	NA	NA
MinimusContig_1051	.	.	2.10646	0.0284854	NA	NA
transcript-124_3163_75PE|m.17476	A disintegrin and metalloproteinase with thrombospondin motifs 16;	A disintegrin and metalloproteinase with thrombospondin motifs 16;	2.10763	0.0642657	NA	NA
R1_Contig3239	.	.	2.11159	0.00212597	NA	NA
transcript-124_44039_75PE	.	.	2.11609	0.0126509	NA	NA
Contig2868|m.13239	Protocadherin-16;	Protocadherin-16;	2.11652	0.0102934	-1.2926	0.0631755
transcript-124_8123_75PE	.	.	2.11685	0.0456803	NA	NA
Myt_cherry_idba_c2715	.	.	2.11778	0.0996236	NA	NA
R1_Contig1621	.	.	2.1195	0.0281862	NA	NA
transcript-124_9805_75PE|m.23807	HIV Tat-specific factor 1 homolog;	HIV Tat-specific factor 1 homolog;	2.1241	0.072749	NA	NA
MinimusContig_2275	.	.	2.12447	0.0283545	NA	NA
transcript-124_809_75PE|m.15099	Basement membrane-specific heparan sulfate proteoglycan core protein;	Basement membrane-specific heparan sulfate proteoglycan core protein;	2.12632	0.0363223	NA	NA
transcript-124_10082_75PE|m.24083	Transcriptional repressor p66-alpha;	Transcriptional repressor p66 alpha;	2.13248	0.0736137	NA	NA
Contig147|m.10564	E3 ubiquitin-protein ligase TRIP12;	E3 ubiquitin-protein ligase TRIP12;	2.13547	0.0219418	NA	NA
transcript-124_6324_75PE|m.20593	Formin-binding protein 4;	Formin-binding protein 4;	2.1368	0.0575367	NA	NA
MinimusContig_3369	.	.	2.13691	0.0584329	NA	NA
transcript-124_27535_75PE|m.39553	.	.	2.13702	0.0849878	NA	NA
transcript-124_1107_75PE|m.15383	General transcription factor 3C polypeptide 2;	General transcription factor 3C polypeptide 2;	2.1426	0.00971786	NA	NA
transcript-124_73358_75PE	.	.	2.14448	0.091967	NA	NA
Myt_cherry_idba_rep_c545	.	.	2.14716	0.0113214	NA	NA
transcript-124_18162_75PE	.	.	2.14747	0.0544423	2.16193	0.00647672
transcript-124_43077_75PE|m.51710	Annexin A7;	Annexin A7;	2.14921	0.0669089	-1.70866	0.0808078
Myt_cherry_idba_rep_c1267	.	.	2.15141	0.0385775	1.66268	0.0530009
transcript-124_685_75PE|m.14963	Snurportin-1;	Snurportin-1;	2.16226	0.0123308	-1.36417	0.0776861
Contig367|m.10863	Heterogeneous nuclear ribonucleoprotein U-like protein 1;	Heterogeneous nuclear ribonucleoprotein U-like protein 1;	2.1673	0.00588404	NA	NA
R1_Contig5950|m.88111	Sodium/potassium-transporting ATPase subunit beta;	Sodium/potassium-transporting ATPase subunit beta;	2.17344	0.0720398	NA	NA
transcript-124_11936_75PE|m.25931	Cilia- and flagella-associated protein 65 {ECO:0000305};	Cilia- and flagella-associated protein 65 {ECO:0000305};	2.17589	0.0544423	NA	NA
transcript-124_34198_75PE|m.44895	Troponin I;	Troponin I;	2.17659	0.0514791	NA	NA
transcript-124_14906_75PE	.	.	2.17793	0.0224043	NA	NA
transcript-124_2742_75PE|m.17063	Pumilio homolog 3 {ECO:0000305};	Pumilio homolog 3 {ECO:0000305};	2.17796	0.0343606	NA	NA
transcript-124_64525_75PE	.	.	2.18041	0.0796205	NA	NA
Myt_cherry_idba_rep_c5585|m.91067	Chondroitin sulfate N-acetylgalactosaminyltransferase 2;	Chondroitin sulfate N-acetylgalactosaminyltransferase 2;	2.18139	0.0308377	NA	NA
MinimusContig_1531|m.2670	Transcription initiation factor TFIID subunit 3;	Transcription initiation factor TFIID subunit 3;	2.1843	0.0396939	-1.58626	0.0863056
transcript-124_21390_75PE	.	.	2.19096	0.0265351	NA	NA
R1_Contig433	.	.	2.19419	0.0136547	NA	NA
R1_Contig6850	.	.	2.19785	0.0531728	NA	NA
MinimusContig_5773	.	.	2.19806	0.0822178	NA	NA
Myt_cherry_idba_rep_c7330|m.91647	Zinc finger protein 37;	Zinc finger and BTB domain-containing protein 16-A {ECO:0000312|EMBL:AAH46887.1};	2.20091	0.0721593	NA	NA
Myt_cherry_idba_rep_c354	.	.	2.20738	0.0759406	NA	NA
transcript-124_668_75PE|m.14937	Transmembrane protein 5;	Transmembrane protein 5;	2.20753	0.0431367	NA	NA
transcript-124_9728_75PE|m.23752	X-ray repair cross-complementing protein 5;	X-ray repair cross-complementing protein 5;	2.20999	0.0727795	NA	NA
MinimusContig_2086|m.4177	Protein FAM234B;	Protein FAM234B;	2.21857	0.00693054	-1.51186	0.0341552
transcript-124_24122_75PE	.	.	2.22152	0.0142168	NA	NA
R2_Contig319	.	.	2.22166	0.0458942	NA	NA
transcript-124_24740_75PE	.	.	2.22211	0.0562431	NA	NA
MinimusContig_5642|m.9848	Myosin light chain kinase, smooth muscle;	Myosin light chain kinase, smooth muscle;	2.22743	0.0642616	NA	NA
R1_Contig3300|m.86913	Pleckstrin homology domain-containing family G member 7;	Pleckstrin homology domain-containing family G member 7;	2.23206	0.0580609	NA	NA
Myt_cherry_idba_rep_c5072	.	.	2.2342	0.0516042	NA	NA
transcript-124_26315_75PE|m.38566	MDS1 and EVI1 complex locus protein EVI1;	MDS1 and EVI1 complex locus protein EVI1;	2.23436	0.00176052	1.23731	0.0686213
MinimusContig_188|m.409	Transcriptional regulator ATRX;	Transcriptional regulator ATRX;	2.23702	0.0575266	NA	NA
MinimusContig_466	.	.	2.2377	0.0690073	NA	NA
transcript-124_373_75PE|m.14577	Protein Shroom2;	Protein Shroom2;	2.24018	0.0172026	-1.68994	0.033249
transcript-124_19551_75PE|m.32853	Copper-transporting ATPase 1;	Copper-transporting ATPase 1;	2.24037	0.0437925	NA	NA
transcript-124_33051_75PE	.	.	2.24042	0.0372013	NA	NA
Myt_cherry_idba_rep_c1435	.	.	2.24217	0.0719736	NA	NA
transcript-124_1697_75PE|m.15915	.	.	2.24906	0.0363185	-1.6616	0.0727567
transcript-124_36248_75PE	.	.	2.25151	0.0149055	NA	NA
transcript-124_92431_75PE	.	.	2.25293	0.0536012	NA	NA
transcript-124_20339_75PE	.	.	2.25624	0.00654282	NA	NA
R1_Contig3307	Heparanase;	.	2.25977	0.00993085	NA	NA
MinimusContig_5193|m.9394	17-beta-hydroxysteroid dehydrogenase 14;	17-beta-hydroxysteroid dehydrogenase 14;	2.27042	0.0720002	NA	NA
transcript-65_15058|m.93466	Tubulin beta chain;	Tubulin beta-4B chain;	2.2721	0.00722577	NA	NA
transcript-124_2478_75PE|m.16737	Nucleoporin GLE1;	Nucleoporin GLE1;	2.27742	0.048693	NA	NA
transcript-124_22410_75PE	.	.	2.2813	0.0271195	NA	NA
R1_Contig7088	.	.	2.2842	0.0542162	NA	NA
Contig3077	.	.	2.28713	0.0206977	NA	NA
transcript-124_4576_75PE	.	.	2.29209	0.0136965	NA	NA
transcript-124_312_75PE|m.14506	Regulator of nonsense transcripts 2;	Regulator of nonsense transcripts 2;	2.2958	0.0215487	-1.55347	0.0798597
Myt_cherry_idba_c6683	.	.	2.31213	0.0294307	NA	NA
transcript-124_32165_75PE	.	.	2.31505	0.0573271	NA	NA
transcript-124_7943_75PE|m.22109	.	.	2.3176	0.0168309	NA	NA
MinimusContig_5152	.	.	2.31808	0.0862818	NA	NA
R1_Contig6642|m.88581	Asparagine--tRNA ligase, cytoplasmic;	Asparagine--tRNA ligase, cytoplasmic;	2.32022	0.0573378	NA	NA
transcript-124_2880_75PE|m.17161	.	.	2.32038	0.00492117	NA	NA
R2_Contig297	Methionine-R-sulfoxide reductase B1;	.	2.3274	0.0127739	NA	NA
R1_Contig2010|m.86238	Haloacid dehalogenase-like hydrolase domain-containing 5 {ECO:0000312|HGNC:HGNC:1843};	Haloacid dehalogenase-like hydrolase domain-containing 5 {ECO:0000312|HGNC:HGNC:1843};	2.32815	0.0816972	NA	NA
transcript-124_6185_75PE|m.20463	.	.	2.33201	0.0452009	NA	NA
R1_Contig3544	.	.	2.33312	0.0601003	NA	NA
R1_Contig3889|m.87208	.	.	2.33613	0.0171434	NA	NA
transcript-124_41528_75PE	.	.	2.33873	0.0690073	NA	NA
MinimusContig_854|m.1528	60S ribosomal protein L14;	60S ribosomal protein L14;	2.33917	0.0304135	NA	NA
transcript-124_38717_75PE	.	.	2.34165	0.0103975	NA	NA
transcript-124_251_75PE|m.14445	Dynein heavy chain 1, axonemal;	Dynein heavy chain 1, axonemal;	2.34795	0.00846883	NA	NA
Contig2677|m.13035	Regulator of G-protein signaling 12;	Regulator of G-protein signaling 12;	2.35815	0.0332336	NA	NA
R1_Contig4681	.	.	2.36368	0.0112701	NA	NA
transcript-124_3281_75PE|m.17569	ATP-binding cassette sub-family A member 3;	ATP-binding cassette sub-family A member 3;	2.36395	0.00326234	NA	NA
transcript-124_19231_75PE|m.32582	PDZ and LIM domain protein 3;	LIM domain-binding protein 3;	2.3692	0.017953	NA	NA
MinimusContig_3398	.	.	2.37436	0.000410994	NA	NA
MinimusContig_4770	.	.	2.3784	0.0604227	NA	NA
Contig222|m.10674	.	.	2.38206	0.0109574	NA	NA
MinimusContig_1082|m.1730	Probable global transcription activator SNF2L2;	Probable global transcription activator SNF2L2;	2.38269	0.011729	NA	NA
Contig120_capround1	.	.	2.38486	0.000523287	NA	NA
Myt_cherry_idba_rep_c16133	.	.	2.39386	0.0128963	NA	NA
R1_Contig1307|m.85698	Coiled-coil domain-containing protein 191;	Coiled-coil domain-containing protein 191;	2.39633	0.0137104	2.15553	0.00647672
transcript-124_22739_75PE	.	.	2.39659	0.0289678	NA	NA
transcript-124_4722_75PE|m.19118	von Willebrand factor A domain-containing protein 3B;	von Willebrand factor A domain-containing protein 3B;	2.40055	0.0298506	NA	NA
MinimusContig_1478|m.2470	Solute carrier family 12 member 8;	Solute carrier family 12 member 8;	2.41032	0.0149774	-1.62152	0.0230546
R1_Contig8211	.	.	2.4167	0.0246559	NA	NA
R1_Contig3230	.	.	2.41773	0.0276134	NA	NA
transcript-124_2758_75PE|m.17071	F-box/WD repeat-containing protein 7 {ECO:0000305};	F-box/WD repeat-containing protein 7 {ECO:0000305};	2.41822	0.0883571	NA	NA
MinimusContig_1184	.	.	2.41858	0.0127131	1.51665	0.0863056
Contig2466|m.12843	Deformed epidermal autoregulatory factor 1 homolog;	Deformed epidermal autoregulatory factor 1 homolog;	2.41906	4.25049e-05	NA	NA
Contig2982|m.13322	Protein SOGA3;	Protein SOGA3;	2.42224	0.0125381	NA	NA
MinimusContig_5897|m.10040	Centrin-1;	Centrin-1;	2.43026	0.0316151	NA	NA
Myt_cherry_idba_rep_c4822	.	.	2.43397	0.0533046	NA	NA
transcript-124_2090_75PE|m.16362	Protein fantom;	Protein fantom;	2.43417	0.0159501	NA	NA
transcript-124_6644_75PE|m.20882	.	.	2.43704	0.0429652	NA	NA
transcript-124_4087_75PE|m.18419	Pleckstrin homology-like domain family B member 2;	Pleckstrin homology-like domain family B member 2;	2.44306	0.085531	NA	NA
R1_Contig654	.	.	2.44362	0.00804766	NA	NA
Myt_cherry_idba_c3395	.	.	2.44919	0.0465148	NA	NA
Contig2607|m.12965	Golgi resident protein GCP60;	Golgi resident protein GCP60;	2.45058	0.0452009	NA	NA
MinimusContig_1298	Cytochrome c oxidase subunit 3;	.	2.45107	0.0248826	NA	NA
transcript-124_15651_75PE|m.29406	.	.	2.45601	0.0579331	NA	NA
R1_Contig2777	.	.	2.45649	0.0230973	NA	NA
transcript-124_873_75PE|m.15179	Forkhead-associated domain-containing protein 1;	Forkhead-associated domain-containing protein 1;	2.45767	0.0398556	NA	NA
transcript-124_31122_75PE|m.42533	Inhibitor of growth protein 4;	Inhibitor of growth protein 4;	2.46049	0.0435569	NA	NA
MinimusContig_2853|m.5853	Armadillo repeat-containing protein 6;	Armadillo repeat-containing protein 6;	2.46298	0.0475836	NA	NA
transcript-124_16988_75PE|m.30572	Nuclear migration protein nudC;	Nuclear migration protein nudC;	2.4672	0.0955997	NA	NA
transcript-124_40864_75PE|m.49913	.	.	2.46753	0.0719736	2.67765	0.0112313
transcript-124_19618_75PE	.	.	2.46844	0.0221615	NA	NA
Contig2036|m.12499	Coiled-coil domain-containing protein 178;	.	2.46987	0.0565456	NA	NA
R1_Contig3114|m.86823	von Willebrand factor D and EGF domain-containing protein;	von Willebrand factor D and EGF domain-containing protein;	2.47485	0.0736137	NA	NA
Myt_cherry_idba_rep_c2109	.	.	2.47494	0.0411776	NA	NA
R1_Contig6861|m.88771	Ran GTPase-activating protein 1;	Ran GTPase-activating protein 1;	2.47602	0.0137195	NA	NA
MinimusContig_1926|m.3845	Kinesin-like protein KIF17;	Kinesin-like protein KIF17;	2.47791	0.0367848	NA	NA
transcript-124_1311_75PE|m.15597	Kinesin-like protein KIF28P;	Kinesin-like protein KIF28P;	2.4852	0.076015	NA	NA
Contig3455	.	.	2.48649	0.0190972	NA	NA
Myt_cherry_idba_rep_c3744	.	.	2.48894	0.0476551	NA	NA
R1_Contig941	.	.	2.49052	0.0465903	NA	NA
transcript-124_3848_75PE|m.18175	Trichoplein keratin filament-binding protein;	Trichoplein keratin filament-binding protein;	2.49209	0.00692378	NA	NA
MinimusContig_3530	.	.	2.49939	0.0271195	NA	NA
transcript-124_1895_75PE|m.16141	Transmembrane protein 131;	Transmembrane protein 131;	2.5034	0.00038089	NA	NA
Contig2371|m.12756	Alpha-mannosidase 2;	Alpha-mannosidase 2;	2.50827	0.0805625	NA	NA
transcript-124_819_75PE|m.15115	Tripartite motif-containing protein 2;	Tripartite motif-containing protein 2;	2.50961	0.00519448	-1.57975	0.0395369
R1_Contig3481	Solute carrier family 25 member 38 {ECO:0000255|HAMAP-Rule:MF_03064};	.	2.51198	0.00532482	NA	NA
MinimusContig_3724|m.7409	Short-chain collagen C4;	Short-chain collagen C4;	2.51372	0.0787517	NA	NA
MinimusContig_6220	.	.	2.5213	0.019623	NA	NA
transcript-124_4098_75PE|m.18424	Ras association domain-containing protein 8;	Ras association domain-containing protein 8;	2.52216	0.0244476	2.14021	0.0166747
Contig428|m.10952	Tetraspanin-9;	CD82 antigen;	2.52895	0.0601912	NA	NA
MinimusContig_3766	.	.	2.53262	0.00685492	NA	NA
MinimusContig_4865	.	.	2.53493	0.018063	NA	NA
Contig2475|m.12853	Coiled-coil domain-containing protein 158;	Coiled-coil domain-containing protein 158;	2.53785	0.0310102	NA	NA
transcript-124_5536_75PE|m.19886	.	.	2.54012	0.0425473	NA	NA
transcript-124_6636_75PE|m.20871	Pentatricopeptide repeat domain-containing protein 3, mitochondrial;	Pentatricopeptide repeat domain-containing protein 3, mitochondrial;	2.54644	0.052932	NA	NA
transcript-124_33311_75PE	.	.	2.55189	0.00494238	NA	NA
Contig1547|m.12117	Minor histocompatibility antigen H13;	Minor histocompatibility antigen H13;	2.55695	0.0387451	NA	NA
R1_Contig6014|m.88154	Protein phosphatase 2C-like domain-containing protein 1;	Protein phosphatase 2C-like domain-containing protein 1;	2.56036	0.0113989	NA	NA
transcript-124_19420_75PE|m.32740	E3 ubiquitin-protein ligase RNF123;	E3 ubiquitin-protein ligase RNF123;	2.56069	0.00592339	-2.28775	0.00161513
Contig3481|m.13728	Proteasomal ubiquitin receptor ADRM1;	Proteasomal ubiquitin receptor ADRM1-B;	2.56364	0.0635752	NA	NA
transcript-124_5302_75PE|m.19677	PRKR-interacting protein 1;	PRKR-interacting protein 1;	2.56607	0.0584329	NA	NA
R1_Contig4010	.	.	2.56936	0.0687362	NA	NA
MinimusContig_4267|m.8272	.	.	2.57231	0.0108729	NA	NA
transcript-124_14146_75PE|m.28045	Armadillo repeat-containing protein 3;	Armadillo repeat-containing protein 3;	2.57469	0.0284854	NA	NA
transcript-124_18942_75PE|m.32350	FRAS1-related extracellular matrix protein 1 {ECO:0000305};	FRAS1-related extracellular matrix protein 1 {ECO:0000305};	2.57954	0.00734335	NA	NA
MinimusContig_1897|m.3784	La-related protein 4B;	.	2.58099	0.00868494	NA	NA
transcript-124_20722_75PE	.	.	2.58191	0.00147778	NA	NA
transcript-124_39174_75PE	.	.	2.58204	0.0444073	NA	NA
MinimusContig_2933	.	.	2.58348	0.0859282	NA	NA
Contig519	.	.	2.58755	0.0145683	NA	NA
transcript-124_6521_75PE	.	.	2.59171	0.00728944	-2.53993	0.00109446
transcript-124_16009_75PE|m.29727	.	.	2.59937	0.0248595	NA	NA
R1_Contig3020	.	.	2.60023	0.0186622	NA	NA
Contig1494|m.12068	Calumenin-B;	Calumenin;	2.60489	0.0682716	NA	NA
transcript-124_56903_75PE	.	.	2.60512	0.067667	NA	NA
Myt_cherry_idba_rep_c277	.	.	2.6052	0.0317004	NA	NA
Contig1706|m.12252	Patatin-like phospholipase domain-containing protein 2;	Patatin-like phospholipase domain-containing protein 2;	2.60667	0.0187608	NA	NA
Contig2794|m.13157	Titin;	Titin;	2.61467	0.00413608	NA	NA
R1_Contig7814	.	.	2.61815	0.0144145	NA	NA
Myt_cherry_idba_rep_c5887|m.91175	Protein disulfide-isomerase A5;	Protein disulfide-isomerase A5;	2.61957	0.0200721	NA	NA
MinimusContig_5667	.	.	2.62058	0.0175108	-2.29792	0.00918174
transcript-124_69234_75PE	.	.	2.6206	0.0974646	NA	NA
MinimusContig_2432	.	.	2.62195	0.0312648	NA	NA
MinimusContig_393	.	.	2.62227	0.0456803	NA	NA
transcript-124_38221_75PE	.	.	2.62967	0.00236252	NA	NA
R1_Contig8358	.	.	2.64433	0.0258462	NA	NA
transcript-124_19170_75PE|m.32523	.	.	2.64689	0.0753234	-3.41726	0.00294191
Myt_cherry_idba_rep_c3749	.	.	2.65139	0.0118728	NA	NA
transcript-124_8640_75PE	.	.	2.65445	0.0272596	NA	NA
Myt_cherry_idba_c10184	.	.	2.65756	0.0145683	1.97443	0.0169988
MinimusContig_1336|m.1890	MAM and LDL-receptor class A domain-containing protein 2;	MAM and LDL-receptor class A domain-containing protein 2;	2.65758	0.000996387	NA	NA
Contig3121	.	.	2.65944	0.0238433	-2.84155	0.00250852
MinimusContig_4805	.	.	2.66075	0.00959805	NA	NA
MinimusContig_432|m.953	.	.	2.66178	0.000720697	1.37421	0.0379499
MinimusContig_1461|m.2440	Protein FAM193A;	Protein FAM193A;	2.66515	0.0162732	NA	NA
Myt_cherry_idba_c7982	.	.	2.67151	0.0972739	NA	NA
transcript-124_14814_75PE	.	.	2.67689	0.0037079	NA	NA
Contig3025	Tubulin polymerization-promoting protein family member 2;	.	2.67841	0.0396315	NA	NA
transcript-55_4010	.	.	2.67894	0.0453924	NA	NA
transcript-124_21501_75PE|m.34378	Sperm-associated antigen 7 homolog;	Sperm-associated antigen 7;	2.68112	0.0125516	NA	NA
transcript-124_22581_75PE|m.35340	Dynamin-binding protein;	Dynamin-binding protein;	2.68331	0.0240414	NA	NA
R1_Contig3665	.	.	2.68499	0.00228509	NA	NA
R1_Contig5292	.	.	2.69295	0.054557	NA	NA
transcript-124_19852_75PE	.	.	2.69591	0.011312	NA	NA
Contig3089	.	.	2.70199	0.015273	-1.78858	0.0414861
transcript-124_1256_75PE|m.15564	THO complex subunit 2;	THO complex subunit 2;	2.70358	0.00529607	NA	NA
R1_Contig3767	.	.	2.70711	0.00957564	NA	NA
Contig2920	.	.	2.71202	0.0177204	NA	NA
transcript-124_26064_75PE	.	.	2.71763	0.00127206	1.2017	0.0699541
Contig717|m.11275	.	.	2.71906	0.0854881	NA	NA
R1_Contig3501	.	.	2.72092	0.046671	NA	NA
transcript-124_10315_75PE|m.24317	Nucleolar protein 11;	Nucleolar protein 11-like;	2.72187	0.0125087	NA	NA
transcript-124_25652_75PE	.	.	2.72333	0.0327818	NA	NA
MinimusContig_3036	.	.	2.72351	0.000880061	NA	NA
Contig2637|m.12999	Tubulin-folding cofactor B;	Tubulin-folding cofactor B;	2.72419	0.0822126	NA	NA
transcript-124_9900_75PE|m.23903	Protein SOGA3;	Protein SOGA3;	2.72642	0.0316151	NA	NA
transcript-124_9238_75PE|m.23316	Doublecortin domain-containing protein 1;	Doublecortin domain-containing protein 1;	2.72738	0.0347569	NA	NA
R1_Contig5991	.	.	2.73066	0.0272979	NA	NA
Myt_cherry_idba_rep_c1521	.	.	2.73424	0.0658884	NA	NA
transcript-124_1313_75PE|m.15598	Threonine--tRNA ligase, cytoplasmic;	Threonine--tRNA ligase, cytoplasmic;	2.73533	0.00722577	-2.7059	0.000781169
MinimusContig_4121	.	.	2.73681	0.0627857	NA	NA
transcript-124_868_75PE|m.15174	MOG interacting and ectopic P-granules protein 1;	.	2.74004	0.00683109	NA	NA
transcript-124_16592_75PE	.	.	2.74066	0.00558233	NA	NA
Contig1215|m.11800	Pre-mRNA-splicing factor syf2;	Pre-mRNA-splicing factor syf2;	2.7477	0.00038089	NA	NA
transcript-124_10923_75PE|m.24957	Carboxylesterase 5A;	Carboxylesterase 5A;	2.75001	0.03534	NA	NA
R1_Contig4845	.	.	2.75214	0.0124225	NA	NA
MinimusContig_1191	.	.	2.75288	0.00976673	NA	NA
MinimusContig_749	.	.	2.75343	0.0199708	NA	NA
Contig801|m.11361	Ubiquitin carboxyl-terminal hydrolase 3;	Ubiquitin carboxyl-terminal hydrolase 3;	2.75346	0.0403943	NA	NA
transcript-124_374_75PE|m.14578	Protein TANC2;	Protein TANC2;	2.75519	0.00143727	NA	NA
transcript-124_41529_75PE	.	.	2.75576	0.0312371	NA	NA
MinimusContig_1568|m.2823	Valine--tRNA ligase;	Valine--tRNA ligase;	2.76585	0.00617915	NA	NA
transcript-124_658_75PE|m.14913	Serine/threonine-protein phosphatase 2A 56 kDa regulatory subunit delta isoform;	Serine/threonine-protein phosphatase 2A 56 kDa regulatory subunit delta isoform;	2.77022	0.00239523	NA	NA
transcript-124_29840_75PE|m.41461	Periostin;	Periostin;	2.77314	0.0635959	NA	NA
transcript-124_35066_75PE	.	.	2.77401	0.0665737	NA	NA
transcript-124_557_75PE|m.14790	Cilia- and flagella-associated protein 54 {ECO:0000305};	Cilia- and flagella-associated protein 54 {ECO:0000305};	2.79381	0.00245651	NA	NA
transcript-124_19765_75PE	.	.	2.79432	0.000761446	NA	NA
R1_Contig605	.	.	2.79864	0.0199104	NA	NA
R1_Contig4617	.	.	2.79898	0.0258462	NA	NA
R1_Contig1971	.	.	2.80267	0.0641864	NA	NA
transcript-124_7485_75PE	.	.	2.81331	0.00502181	NA	NA
transcript-124_12514_75PE|m.26497	WD repeat-containing protein 90;	WD repeat-containing protein 90;	2.81383	0.0602763	NA	NA
R1_Contig2402	.	.	2.81509	0.0317666	NA	NA
MinimusContig_5397	.	.	2.81693	0.046671	NA	NA
transcript-124_1840_75PE|m.16071	Cell surface hyaluronidase {ECO:0000303|PubMed:10767548};	Cell surface hyaluronidase {ECO:0000303|PubMed:10767548};	2.82663	0.00427796	NA	NA
transcript-124_12949_75PE	.	.	2.83274	0.0499723	NA	NA
Contig3409|m.13665	Mitochondrial-processing peptidase subunit beta;	Mitochondrial-processing peptidase subunit beta;	2.83441	0.0272979	NA	NA
transcript-124_70136_75PE	.	.	2.83451	0.0463769	NA	NA
Contig1582|m.12151	Cell division control protein 6 homolog;	Cell division control protein 6 homolog;	2.8435	0.0342907	NA	NA
R1_Contig6487|m.88417	Hypoxia-inducible factor 1-alpha;	Hypoxia-inducible factor 1-alpha;	2.84501	0.0137195	NA	NA
MinimusContig_3811|m.7538	Thymidine kinase 2, mitochondrial;	Thymidine kinase 2, mitochondrial;	2.84558	0.0459449	NA	NA
Contig1766	Epididymal secretory protein E1;	.	2.84672	0.0256849	NA	NA
transcript-124_21518_75PE|m.34400	Glycine amidinotransferase, mitochondrial;	Glycine amidinotransferase, mitochondrial;	2.86305	0.00499891	NA	NA
transcript-124_33432_75PE|m.44326	Protein KRTCAP2 homolog;	Protein KRTCAP2 homolog;	2.87599	0.058934	NA	NA
transcript-124_628_75PE|m.14890	Probable phospholipid-transporting ATPase VA;	Probable phospholipid-transporting ATPase VD;	2.87985	0.0372013	NA	NA
transcript-124_28712_75PE|m.40546	.	.	2.88493	0.0194146	-3.02652	0.00206588
MinimusContig_6033|m.10171	Thioredoxin domain-containing protein 6;	Thioredoxin domain-containing protein 6;	2.88514	0.0849878	NA	NA
Myt_cherry_idba_rep_c10766|m.92658	Calmodulin;	Calmodulin;	2.89115	0.0721593	NA	NA
MinimusContig_3244|m.6533	Telomerase protein component 1;	Telomerase protein component 1;	2.89252	0.000979442	NA	NA
transcript-124_7430_75PE|m.21622	RRP12-like protein;	RRP12-like protein;	2.89986	0.00558233	NA	NA
MinimusContig_4636	.	.	2.90034	0.00500429	NA	NA
transcript-124_23421_75PE|m.36031	Aminomethyltransferase, mitochondrial {ECO:0000305};	Aminomethyltransferase, mitochondrial {ECO:0000305};	2.9005	0.00558233	NA	NA
MinimusContig_632|m.1294	RNA-binding protein 5;	RNA-binding protein 5;	2.90367	0.00487902	NA	NA
transcript-124_25663_75PE|m.38015	.	.	2.92093	0.0329085	NA	NA
MinimusContig_1702	.	.	2.92957	0.0112094	NA	NA
R1_Contig2051|m.86260	60S ribosomal protein L17;	60S ribosomal protein L17;	2.9326	0.00554564	NA	NA
R1_Contig5972	.	.	2.93528	6.68667e-05	NA	NA
MinimusContig_769|m.1458	Centrosomal protein of 164 kDa;	Centrosomal protein of 164 kDa;	2.93707	0.00429209	NA	NA
Contig3465|m.13709	Clathrin interactor 1;	Clathrin interactor 1;	2.95956	0.0180481	NA	NA
transcript-124_29546_75PE	.	.	2.96611	0.0171434	NA	NA
MinimusContig_1338|m.1896	Histone-lysine N-methyltransferase, H3 lysine-79 specific;	Histone-lysine N-methyltransferase, H3 lysine-79 specific;	2.96657	0.000140543	NA	NA
R1_Contig3568|m.87041	Oxysterol-binding protein-related protein 9;	Oxysterol-binding protein-related protein 9;	2.9666	0.00235746	NA	NA
R1_Contig611	.	.	2.96703	0.001077	-1.63207	0.0480369
transcript-124_2162_75PE|m.16442	Protein pangolin, isoforms A/H/I/S;	Protein pangolin, isoforms A/H/I/S;	2.97757	0.00520479	NA	NA
Contig2937	.	.	2.97775	0.0230177	2.33564	0.0342249
R2_Contig479|m.84822	Heat shock protein 70 B2;	Heat shock protein 70 B2;	2.97941	0.0506967	NA	NA
transcript-124_26254_75PE|m.38514	Talin-2;	Talin-2;	2.97957	0.0272596	-2.14943	0.063865
transcript-124_3099_75PE|m.17411	Cilia- and flagella-associated protein 74 {ECO:0000305};	Cilia- and flagella-associated protein 74 {ECO:0000305};	2.98116	0.0037079	NA	NA
Contig2715	.	.	2.98233	0.0258824	NA	NA
R1_Contig7510	.	.	2.9831	0.00755149	NA	NA
Contig27_capround1	.	.	2.98837	0.00532482	2.04296	0.0280975
transcript-124_10772_75PE|m.24806	Protein polybromo-1;	Protein polybromo-1;	2.99341	0.00362315	NA	NA
R2_Contig385|m.84761	Leucine-rich repeat-containing protein 74A {ECO:0000250|UniProtKB:Q0VAA2};	Leucine-rich repeat-containing protein 74A {ECO:0000250|UniProtKB:Q0VAA2};	2.99377	0.00247444	NA	NA
Contig32_capround1|m.10396	Twitchin {ECO:0000303|PubMed:7190524};	Twitchin {ECO:0000303|PubMed:7190524};	2.99536	3.48393e-05	NA	NA
R1_Contig5472	.	.	3.02206	0.0122276	2.52779	0.00997415
MinimusContig_579|m.1212	.	.	3.02685	0.0436074	NA	NA
transcript-124_1257_75PE|m.15565	THO complex subunit 2;	THO complex subunit 2;	3.03056	0.000868209	NA	NA
Contig1045|m.11654	Protein kintoun {ECO:0000255|HAMAP-Rule:MF_03069};	Protein kintoun {ECO:0000255|HAMAP-Rule:MF_03069};	3.03326	0.00112019	NA	NA
Myt_cherry_idba_rep_c12081|m.92950	Blastula protease 10;	Blastula protease 10;	3.03471	0.00419502	NA	NA
transcript-124_58467_75PE	.	.	3.0353	0.00150393	NA	NA
R1_Contig1307|m.85699	Coiled-coil domain-containing protein 191;	Coiled-coil domain-containing protein 191;	3.04013	0.0855112	NA	NA
MinimusContig_226|m.496	Syndecan;	Syndecan;	3.04308	0.00722577	NA	NA
Myt_cherry_idba_rep_c2068	.	.	3.04744	0.00194532	NA	NA
transcript-124_11579_75PE|m.25592	von Willebrand factor D and EGF domain-containing protein;	von Willebrand factor D and EGF domain-containing protein;	3.05075	0.0655754	NA	NA
transcript-124_7259_75PE|m.21483	Myosin heavy chain, striated muscle;	Myosin heavy chain, striated muscle;	3.06408	0.00714927	NA	NA
Contig349|m.10843	Beta-hexosaminidase subunit beta;	Beta-hexosaminidase subunit beta;	3.06426	0.0182608	NA	NA
MinimusContig_75	.	.	3.06769	0.0244887	NA	NA
MinimusContig_474|m.995	.	.	3.07114	0.0210386	NA	NA
transcript-124_23254_75PE	.	.	3.07782	0.00145229	NA	NA
R3_Contig33|m.84504	.	Lung adenoma susceptibility protein 2;	3.07935	0.0689316	-2.41797	0.071451
R1_Contig3101|m.86817	U1 small nuclear ribonucleoprotein 70 kDa;	U1 small nuclear ribonucleoprotein 70 kDa;	3.0876	0.00352395	NA	NA
R1_Contig5213	.	.	3.08778	1.14238e-05	NA	NA
transcript-124_21282_75PE	.	.	3.09665	0.0347529	NA	NA
transcript-124_22210_75PE	.	.	3.09839	0.000478431	NA	NA
transcript-124_49713_75PE|m.56639	.	.	3.10477	0.050661	NA	NA
R1_Contig6818|m.88744	Guanylate cyclase soluble subunit beta-1;	Guanylate cyclase soluble subunit beta-1;	3.11538	0.00268635	NA	NA
Contig312	.	.	3.12096	1.38535e-05	NA	NA
transcript-124_3317_75PE|m.17604	.	.	3.1253	0.000996387	NA	NA
R2_Contig578|m.84855	26S proteasome regulatory subunit 8;	26S proteasome regulatory subunit 8;	3.12847	0.0187608	-2.65099	0.0150187
transcript-124_59911_75PE|m.63937	.	.	3.13418	0.0253799	-3.03289	0.00710075
MinimusContig_1294	.	.	3.14358	0.000471989	NA	NA
R1_Contig3878	.	.	3.14547	0.00852121	NA	NA
transcript-124_3639_75PE|m.17950	Protein LSM14 homolog A;	Protein LSM14 homolog A;	3.14559	0.0127372	NA	NA
Myt_cherry_idba_rep_c10459|m.92561	CAP-Gly domain-containing linker protein 4;	CAP-Gly domain-containing linker protein 1;	3.14839	0.0510214	NA	NA
transcript-124_9037_75PE|m.23141	Myeloperoxidase;	Peroxidasin homolog;	3.15416	0.0169184	NA	NA
R1_Contig3877	.	.	3.15572	0.0704964	NA	NA
R1_Contig4768|m.87566	Beclin-1;	Beclin-1;	3.16235	0.0112701	NA	NA
Contig2997|m.13337	KH domain-containing, RNA-binding, signal transduction-associated protein 3;	KH domain-containing, RNA-binding, signal transduction-associated protein 3;	3.16546	0.0652326	NA	NA
R1_Contig2952|m.86741	RIIa domain-containing protein 1;	RIIa domain-containing protein 1;	3.16946	0.0283322	NA	NA
MinimusContig_5099|m.9294	.	.	3.17062	0.00910294	NA	NA
transcript-124_52323_75PE|m.58540	Frizzled-4;	Frizzled-4;	3.17102	0.0612578	NA	NA
transcript-124_49431_75PE|m.56409	Tyrosine-protein kinase JAK2;	Tyrosine-protein kinase JAK2;	3.17171	0.0125381	NA	NA
transcript-124_71114_75PE|m.71311	Mblk-1-related factor 1 {ECO:0000303|PubMed:16139210};	Mblk-1-related factor 1 {ECO:0000303|PubMed:16139210};	3.1761	0.00243846	NA	NA
MinimusContig_1508|m.2567	Histone-lysine N-methyltransferase SETDB1;	Histone-lysine N-methyltransferase SETDB1-B;	3.17827	0.00912522	NA	NA
R1_Contig5211	.	.	3.18026	0.00557153	NA	NA
transcript-124_17970_75PE	.	.	3.18325	0.0114452	NA	NA
MinimusContig_420|m.934	Metastasis-associated protein MTA1;	Metastasis-associated protein MTA1;	3.19883	0.00247444	NA	NA
MinimusContig_4028	.	.	3.2039	0.00555348	NA	NA
transcript-124_20425_75PE	.	.	3.21696	0.00124428	NA	NA
R1_Contig7800	.	.	3.22001	0.0292813	NA	NA
Contig3135|m.13451	Inhibitor of growth protein 1;	Inhibitor of growth protein 1;	3.22093	0.00144276	NA	NA
transcript-124_35452_75PE	.	.	3.22148	0.000514855	-2.2386	0.00500778
R1_Contig7489|m.89228	Elongation factor 1-gamma;	Elongation factor 1-gamma;	3.22678	7.53239e-05	NA	NA
transcript-124_21591_75PE|m.34460	TAF6-like RNA polymerase II p300/CBP-associated factor-associated factor 65 kDa subunit 6L;	TAF6-like RNA polymerase II p300/CBP-associated factor-associated factor 65 kDa subunit 6L;	3.2338	0.00118029	NA	NA
transcript-124_13695_75PE|m.27696	.	.	3.2339	0.00667948	NA	NA
R1_Contig4960|m.87645	Glucose dehydrogenase [FAD, quinone];	Glucose dehydrogenase [FAD, quinone];	3.23484	0.0123668	NA	NA
transcript-124_19849_75PE|m.33083	.	.	3.23891	0.00632999	NA	NA
Myt_cherry_idba_c6094|m.91243	Protein lev-9;	Protein lev-9;	3.2394	0.0125566	NA	NA
transcript-124_3647_75PE|m.17967	Unc-112-related protein;	Unc-112-related protein;	3.24186	0.000272978	-2.09576	0.00895783
transcript-124_5330_75PE|m.19702	Regulator of G-protein signaling 14;	Regulator of G-protein signaling loco;	3.24373	0.0232752	NA	NA
transcript-124_755_75PE|m.15033	Cyclin-dependent kinase 12;	Cyclin-dependent kinase 13;	3.24527	4.37862e-05	NA	NA
Myt_cherry_idba_rep_c12451|m.93023	Rab3 GTPase-activating protein catalytic subunit;	Rab3 GTPase-activating protein catalytic subunit;	3.25225	0.00106483	NA	NA
MinimusContig_6196	.	.	3.27092	0.0190255	NA	NA
MinimusContig_2162|m.4342	Centrosomal protein of 83 kDa;	Centrosomal protein of 83 kDa;	3.27544	0.00833279	NA	NA
transcript-124_15623_75PE|m.29374	Calexcitin-2;	Calexcitin-2;	3.27847	0.015273	NA	NA
transcript-124_38302_75PE	.	.	3.29335	0.0041396	NA	NA
Myt_cherry_idba_rep_c1525|m.90060	Intraflagellar transport protein 57 homolog;	Intraflagellar transport protein 57 homolog;	3.29838	0.0264318	NA	NA
Contig1794	.	.	3.30142	0.00597049	2.7042	0.00746559
transcript-124_60146_75PE	.	.	3.30455	0.00427796	-2.21135	0.0235467
transcript-124_42407_75PE|m.51149	Density-regulated protein homolog {ECO:0000303|PubMed:25043021};	Density-regulated protein homolog {ECO:0000303|PubMed:25043021};	3.32001	0.00800893	NA	NA
R2_Contig453|m.84808	26S proteasome regulatory subunit 4;	26S proteasome regulatory subunit 4;	3.32253	0.00261995	-3.64442	8.93682e-05
transcript-124_5266_75PE|m.19622	DBH-like monooxygenase protein 1 homolog;	DBH-like monooxygenase protein 1 homolog;	3.32358	0.000343517	NA	NA
R1_Contig3855	.	.	3.33312	0.000419931	NA	NA
MinimusContig_2932	.	.	3.33409	0.0136428	NA	NA
Contig1237|m.11831	.	.	3.33684	0.0256373	NA	NA
transcript-124_78055_75PE	.	.	3.3373	0.0112701	NA	NA
MinimusContig_4509|m.8617	Secretory carrier-associated membrane protein 1;	Secretory carrier-associated membrane protein 1;	3.33985	0.0169184	NA	NA
Myt_cherry_idba_rep_c9967	.	.	3.34128	0.00989015	NA	NA
R1_Contig7261|m.89064	.	.	3.34853	0.0059053	NA	NA
transcript-124_20497_75PE|m.33629	Spectrin alpha chain, non-erythrocytic 1;	Spectrin alpha chain, non-erythrocytic 1;	3.35023	0.0247746	NA	NA
transcript-124_16591_75PE	.	.	3.37242	0.0248595	NA	NA
Contig3205	.	.	3.37445	3.37608e-05	NA	NA
transcript-124_14259_75PE|m.28148	Proline dehydrogenase 1, mitochondrial;	Proline dehydrogenase 1, mitochondrial;	3.38614	0.0907843	-4.03949	0.00563515
transcript-124_860_75PE|m.15167	Death domain-containing protein 1;	Death domain-containing protein 1;	3.39412	5.19814e-05	NA	NA
transcript-124_89713_75PE	.	.	3.39682	0.0106115	NA	NA
transcript-124_35988_75PE	.	.	3.40674	0.00511784	NA	NA
transcript-124_26132_75PE|m.38392	Calmodulin-lysine N-methyltransferase;	Calmodulin-lysine N-methyltransferase;	3.40941	0.000286453	NA	NA
MinimusContig_2031|m.4050	Serine/arginine repetitive matrix protein 1;	Serine/arginine repetitive matrix protein 1;	3.41135	1.31075e-05	NA	NA
MinimusContig_1187|m.1781	SLIT-ROBO Rho GTPase-activating protein 3;	.	3.42955	0.00928132	2.34729	0.0462911
Myt_cherry_idba_rep_c3809|m.90467	Troponin T;	Troponin T;	3.44162	0.000996387	NA	NA
R1_Contig5476|m.87856	S-crystallin SL11;	S-crystallin SL11;	3.44326	0.0167082	NA	NA
MinimusContig_4605	.	.	3.45471	0.000179883	NA	NA
Myt_cherry_idba_c25|m.89769	V-type proton ATPase subunit E;	V-type proton ATPase subunit E;	3.46846	0.03585	NA	NA
R1_Contig5324	.	.	3.48385	0.00321353	2.62172	0.00839406
transcript-124_78828_75PE	.	.	3.49255	0.0852286	NA	NA
MinimusContig_335	.	.	3.49562	3.3687e-05	2.70773	0.000187792
R1_Contig7699|m.89335	ATP synthase subunit b, mitochondrial;	ATP synthase subunit b, mitochondrial;	3.50051	0.00295491	NA	NA
R1_Contig2812	Glutamine synthetase;	.	3.50192	0.0286614	NA	NA
transcript-124_76336_75PE	.	.	3.50294	0.0124225	NA	NA
Contig237|m.10695	Condensin complex subunit 1;	Condensin complex subunit 1;	3.51444	0.000223952	NA	NA
MinimusContig_861|m.1534	Septin-7;	Septin-7;	3.52091	0.0032886	NA	NA
MinimusContig_3111	.	.	3.52256	0.000118321	NA	NA
transcript-124_68615_75PE	.	.	3.5279	0.00626001	NA	NA
transcript-124_25222_75PE	.	.	3.5308	0.0338055	NA	NA
transcript-124_45194_75PE	.	.	3.53121	0.00144554	NA	NA
transcript-60_1886	Zinc finger matrin-type protein 2;	.	3.53707	0.000814199	NA	NA
Myt_cherry_idba_rep_c86	.	.	3.55954	0.000720697	NA	NA
transcript-124_30754_75PE	.	.	3.56159	0.00184067	NA	NA
MinimusContig_514|m.1103	LIM domain-binding protein 2;	LIM domain-binding protein 2;	3.56236	1.92093e-06	NA	NA
R1_Contig2423	.	.	3.56383	0.00554564	NA	NA
transcript-124_19334_75PE|m.32655	Tetratricopeptide repeat protein 19, mitochondrial;	Tetratricopeptide repeat protein 19, mitochondrial;	3.56455	0.0318313	NA	NA
MinimusContig_938|m.1632	Rho GTPase-activating protein 6;	Rho GTPase-activating protein 6;	3.56597	0.000179883	NA	NA
R1_Contig7233|m.89049	Eukaryotic translation initiation factor 5A-1;	Eukaryotic translation initiation factor 5A-1;	3.56937	0.0100258	NA	NA
transcript-124_23255_75PE	.	.	3.57666	0.000236984	NA	NA
R1_Contig4685	Zinc finger matrin-type protein 2;	.	3.5801	0.000779324	NA	NA
R1_Contig539	.	.	3.58281	0.00112441	NA	NA
R1_Contig1163|m.85596	Coiled-coil domain-containing protein 15;	Coiled-coil domain-containing protein 15;	3.5879	0.00474783	-2.43326	0.0273537
transcript-124_7018_75PE|m.21261	WD repeat-containing protein 63;	.	3.60089	0.0060944	NA	NA
transcript-124_3318_75PE|m.17605	.	.	3.60307	0.0153254	NA	NA
R1_Contig2887	.	.	3.60575	0.00450404	NA	NA
R2_Contig298	.	.	3.60762	5.71801e-05	-1.69741	0.0421566
transcript-124_39712_75PE|m.49064	Titin;	Titin;	3.60955	0.00203555	NA	NA
transcript-124_32892_75PE	.	.	3.62342	0.00886488	-2.44488	0.0424067
transcript-124_89183_75PE	.	.	3.64812	0.00413264	NA	NA
transcript-75_5325	.	.	3.65577	0.000705523	2.398	0.0112528
transcript-124_1563_75PE|m.15828	Zinc finger protein 2 homolog;	Zinc finger protein 2 homolog;	3.65734	0.000136377	NA	NA
Myt_cherry_idba_c10250	.	.	3.65973	0.00851335	NA	NA
Myt_cherry_idba_rep_c14548	.	.	3.67319	0.00138365	NA	NA
transcript-124_16453_75PE|m.30101	.	.	3.67347	9.12577e-06	NA	NA
MinimusContig_848	.	.	3.68976	1.30482e-05	1.70077	0.0285298
Contig3008|m.13347	.	.	3.69037	0.00200526	3.98132	8.93682e-05
R1_Contig3013	.	.	3.69745	0.0172821	NA	NA
R1_Contig3709|m.87117	.	.	3.70148	0.00383344	NA	NA
transcript-124_22237_75PE|m.34993	.	.	3.70233	0.027418	NA	NA
Contig2758|m.13105	Cilia- and flagella-associated protein 58 {ECO:0000305};	Cilia- and flagella-associated protein 58 {ECO:0000305};	3.70839	0.000499875	NA	NA
R1_Contig1005|m.85480	ER membrane protein complex subunit 3;	ER membrane protein complex subunit 3;	3.70953	0.00200798	NA	NA
Myt_cherry_idba_rep_c10861	.	.	3.71926	0.00011359	-1.84252	0.0260657
transcript-124_61493_75PE	.	.	3.72899	0.0184423	NA	NA
transcript-124_8280_75PE|m.22408	Rhomboid-related protein 2;	Rhomboid-related protein 2;	3.74053	0.0068438	NA	NA
Myt_cherry_idba_rep_c1290|m.90002	Apolipophorins;	.	3.75086	0.0150311	NA	NA
MinimusContig_724|m.1393	.	.	3.76026	0.080839	NA	NA
MinimusContig_285|m.611	Cytoplasmic dynein 2 heavy chain 1;	Cytoplasmic dynein 2 heavy chain 1;	3.76165	4.32872e-07	NA	NA
R1_Contig8637	.	.	3.76224	0.000145041	NA	NA
transcript-124_576_75PE|m.14826	Coiled-coil domain-containing protein 186;	Coiled-coil domain-containing protein 186;	3.76243	0.0149774	NA	NA
transcript-124_65784_75PE	.	.	3.77007	0.00123125	NA	NA
transcript-124_51498_75PE|m.57939	Perlucin;	Perlucin-like protein {ECO:0000303|PubMed:21643827};	3.77384	0.00213912	NA	NA
R1_Contig2823|m.86668	Pyridoxal 5'-phosphate synthase subunit SNZERR;	Pyridoxal 5'-phosphate synthase subunit SNZERR;	3.77668	0.00268635	NA	NA
MinimusContig_35|m.66	.	.	3.78976	5.59586e-07	NA	NA
MinimusContig_2438|m.4930	Protein phosphatase 1B;	Protein phosphatase 1B;	3.79512	0.00063239	NA	NA
R1_Contig2343|m.86454	MICOS complex subunit Mic10;	MICOS complex subunit Mic10;	3.79557	0.0189411	-4.87466	8.93682e-05
transcript-124_90430_75PE	.	.	3.80504	0.00875268	NA	NA
transcript-124_215_LongLar8|m.13782	.	.	3.80981	0.0013964	NA	NA
transcript-124_64636_75PE	.	.	3.8107	0.0689139	NA	NA
transcript-124_73478_75PE|m.72815	.	.	3.81904	0.0134344	NA	NA
R1_Contig7083	.	.	3.82437	0.000921237	-1.87815	0.0710768
transcript-124_50581_75PE|m.57281	Mammalian ependymin-related protein 1;	Mammalian ependymin-related protein 1;	3.82765	0.00206226	NA	NA
R1_Contig5581	.	.	3.83697	0.0429038	NA	NA
transcript-124_1300_75PE|m.15588	Tetratricopeptide repeat protein 6;	Tetratricopeptide repeat protein 6;	3.84068	0.00172027	NA	NA
transcript-124_52915_75PE|m.58952	Neurocan core protein;	Neurocan core protein;	3.84192	0.00519448	NA	NA
transcript-124_7052_75PE|m.21302	Calponin homolog OV9M;	Calponin homolog OV9M;	3.84455	0.0121525	NA	NA
transcript-124_1742_75PE|m.15972	Sperm flagellar protein 1;	Sperm flagellar protein 1;	3.87356	0.048693	NA	NA
transcript-124_73041_75PE	.	.	3.8911	0.00463024	NA	NA
transcript-55_15692|m.93434	Arginine kinase;	Arginine kinase;	3.89268	0.00322981	NA	NA
R1_Contig1553|m.85886	.	.	3.89663	0.0131623	3.4622	0.0095593
transcript-124_53684_75PE|m.59575	Zwei Ig domain protein zig-4 {ECO:0000303|PubMed:11809975};	Zwei Ig domain protein zig-4 {ECO:0000303|PubMed:11809975};	3.90082	0.0251986	NA	NA
MinimusContig_251|m.542	WASH complex subunit 2 {ECO:0000312|MGI:MGI:106463};	WASH complex subunit 2 {ECO:0000312|MGI:MGI:106463};	3.90255	0.00212597	NA	NA
transcript-124_66118_75PE	.	.	3.90286	0.00638027	NA	NA
transcript-124_12799_75PE|m.26793	Serine/threonine-protein kinase DCLK2;	Serine/threonine-protein kinase DCLK2;	3.91574	0.000887842	NA	NA
transcript-124_65209_75PE	.	.	3.92842	0.00212597	-3.75922	0.000188404
transcript-124_10051_75PE|m.24043	Probable lysine-specific demethylase 4B;	Probable lysine-specific demethylase 4B;	3.93774	0.00167857	NA	NA
Myt_cherry_idba_c5118|m.90894	E3 UFM1-protein ligase 1 {ECO:0000305};	E3 UFM1-protein ligase 1 {ECO:0000305};	3.93847	0.0114327	NA	NA
R1_Contig1327	.	.	3.94982	0.0034754	NA	NA
transcript-124_3700_75PE|m.18007	Titin;	Titin;	3.99539	6.95466e-06	NA	NA
transcript-124_47469_75PE	.	.	4.00011	0.0129531	NA	NA
Contig3339|m.13613	F-box only protein 11;	F-box only protein 11;	4.00223	0.000428328	-2.0135	0.0439023
Myt_cherry_idba_rep_c3995|m.90532	Octopine dehydrogenase {ECO:0000312|EMBL:CAC36305.1};	Octopine dehydrogenase {ECO:0000312|EMBL:CAC36305.1};	4.00452	0.00138365	NA	NA
Contig1191	.	.	4.02439	9.38689e-07	2.28296	0.00125767
Myt_cherry_idba_c7781	.	.	4.03307	0.069499	NA	NA
MinimusContig_809|m.1490	Unconventional myosin-XV;	.	4.03335	0.0163629	NA	NA
transcript-124_13789_75PE	.	.	4.03599	8.13163e-06	2.09798	0.0125369
R1_Contig6264	.	.	4.04251	0.0003014	-2.25853	0.031119
transcript-124_386_75PE|m.14592	Clustered mitochondria protein homolog {ECO:0000255|HAMAP-Rule:MF_03013};	Clustered mitochondria protein homolog {ECO:0000255|HAMAP-Rule:MF_03013};	4.04825	0.000303618	NA	NA
R1_Contig2997	.	.	4.07367	0.000311692	NA	NA
MinimusContig_1947|m.3867	Serine/threonine-protein kinase Nek11;	Serine/threonine-protein kinase Nek11;	4.07387	0.000173856	NA	NA
MinimusContig_644	.	.	4.08684	0.000179883	NA	NA
R1_Contig879|m.85400	Annexin A11;	Annexin A11;	4.12065	0.000767608	NA	NA
transcript-124_1160_75PE|m.15466	Probable helicase senataxin {ECO:0000305};	Probable helicase senataxin {ECO:0000305};	4.13409	0.00046604	NA	NA
MinimusContig_445|m.971	.	.	4.16794	0.00429209	NA	NA
transcript-124_19372_75PE	.	.	4.17463	6.93542e-05	NA	NA
transcript-124_79123_75PE|m.76296	Serine protease inhibitor Cvsi-2 {ECO:0000303|PubMed:19464375};	Serine protease inhibitor Cvsi-2 {ECO:0000303|PubMed:19464375};	4.2028	0.0244476	3.34908	0.0386688
transcript-124_34460_75PE|m.45075	Wiskott-Aldrich syndrome protein family member 3;	Wiskott-Aldrich syndrome protein family member 3;	4.21757	0.000527554	NA	NA
transcript-124_73318_75PE	.	.	4.23151	0.00566965	NA	NA
transcript-124_51104_75PE|m.57651	.	.	4.27501	0.0254046	NA	NA
transcript-124_49316_75PE|m.56309	.	.	4.30753	0.0150921	NA	NA
R1_Contig6602|m.88536	Protein PIF;	Protein PIF;	4.31247	4.9976e-05	NA	NA
Contig3503	.	.	4.32062	3.15379e-05	NA	NA
transcript-124_42966_75PE|m.51606	Metalloproteinase inhibitor 3;	Metalloproteinase inhibitor 3;	4.33095	0.00228081	-2.68729	0.0271928
transcript-124_12372_75PE|m.26346	.	.	4.34192	0.00881295	NA	NA
MinimusContig_237|m.514	Intraflagellar transport protein 140 homolog;	Intraflagellar transport protein 140 homolog;	4.35649	7.53239e-05	-2.86782	0.00335774
transcript-124_2813_75PE|m.17116	Serine/threonine-protein phosphatase 6 regulatory subunit 3;	Serine/threonine-protein phosphatase 6 regulatory subunit 3;	4.36168	0.000543449	NA	NA
transcript-124_46204_75PE|m.53910	.	.	4.4001	0.0682624	NA	NA
R1_Contig1545|m.85884	Dolichol-phosphate mannosyltransferase subunit 1;	Dolichol-phosphate mannosyltransferase subunit 1;	4.42825	0.00235746	2.88426	0.0239755
transcript-124_67958_75PE	.	.	4.43539	0.00155611	NA	NA
Contig3259	.	.	4.47925	0.000695356	NA	NA
MinimusContig_4395|m.8442	.	MAM domain-containing protein 2;	4.4793	0.00136437	NA	NA
Myt_cherry_idba_c3823|m.90472	Cilia- and flagella-associated protein 20;	.	4.53245	0.00129122	NA	NA
transcript-55_12961	.	.	4.54577	0.013346	NA	NA
R1_Contig3158|m.86845	Cytochrome c oxidase subunit 6A1, mitochondrial;	Cytochrome c oxidase subunit 6A1, mitochondrial;	4.55527	0.00129316	-3.50191	0.00375545
transcript-124_3334_75PE|m.17630	5'-3' exoribonuclease 2;	5'-3' exoribonuclease 2;	4.55741	3.82087e-08	NA	NA
R1_Contig7547	.	.	4.57989	0.000253904	-2.98663	0.00397357
transcript-124_78489_75PE	.	.	4.64543	0.00138365	NA	NA
transcript-124_21542_75PE|m.34428	Eukaryotic translation initiation factor 3 subunit I {ECO:0000255|HAMAP-Rule:MF_03008};	Eukaryotic translation initiation factor 3 subunit I {ECO:0000255|HAMAP-Rule:MF_03008};	4.66398	0.000352363	2.31152	0.048524
transcript-124_75509_75PE|m.74122	.	.	4.67822	0.00147778	NA	NA
transcript-124_39726_75PE	.	.	4.68885	8.04693e-05	2.11303	0.0729611
MinimusContig_1636	.	.	4.74601	5.6888e-07	NA	NA
transcript-124_28037_75PE|m.39963	.	.	4.75264	0.001419	NA	NA
R1_Contig214|m.84991	Innexin unc-9;	Innexin unc-9;	4.79002	0.00022897	NA	NA
R1_Contig1898|m.86150	Adenylosuccinate synthetase isozyme 1 {ECO:0000255|HAMAP-Rule:MF_03126};	Adenylosuccinate synthetase isozyme 1 {ECO:0000255|HAMAP-Rule:MF_03126};	4.82211	7.38575e-05	NA	NA
transcript-124_59911_75PE|m.63939	.	.	5.02924	0.000223952	-3.0577	0.00856434
transcript-124_66463_75PE|m.68334	.	.	5.04954	0.00167857	NA	NA
Contig3477|m.13723	Arginine/serine-rich protein PNISR;	Arginine/serine-rich protein PNISR;	5.15466	1.92446e-06	NA	NA
transcript-124_4622_75PE|m.19032	Cytochrome P450 26A1;	Cytochrome P450 26A1;	5.18668	5.84203e-07	NA	NA
R1_Contig3391|m.86962	Neutral and basic amino acid transport protein rBAT;	Neutral and basic amino acid transport protein rBAT;	5.19107	2.74304e-06	-2.14149	0.0392776
transcript-124_25908_75PE	.	.	5.21682	8.31624e-05	NA	NA
R1_Contig7519	.	.	5.3767	1.4754e-06	NA	NA
transcript-65_14	.	.	5.4202	0.000300395	NA	NA
MinimusContig_1842|m.3658	Cytokine-dependent hematopoietic cell linker;	.	5.44676	4.58693e-06	NA	NA
transcript-124_25899_75PE	.	.	5.68425	2.24661e-07	NA	NA
R1_Contig7355|m.89129	Eukaryotic translation initiation factor 3 subunit M {ECO:0000255|HAMAP-Rule:MF_03012};	Eukaryotic translation initiation factor 3 subunit M {ECO:0000255|HAMAP-Rule:MF_03012};	5.94821	7.34274e-06	NA	NA
transcript-124_68491_75PE	.	.	6.60326	1.95439e-06	NA	NA
R1_Contig5886|m.88049	Calmodulin;	Calmodulin;	6.97796	0.00261199	NA	NA
R1_Contig4001|m.87281	Ubiquitin-conjugating enzyme E2 Q1;	Ubiquitin-conjugating enzyme E2 Q1;	7.19208	3.77357e-06	NA	NA
transcript-70_5124|m.93468	.	.	8.00974	4.16519e-09	NA	NA
transcript-124_76199_75PE	.	.	NA	NA	-4.55331	0.000208999
MinimusContig_2437|m.4929	Fatty acid-binding protein, adipocyte;	Fatty acid-binding protein, adipocyte;	NA	NA	-4.36472	0.00340657
MinimusContig_5855|m.10020	.	.	NA	NA	-4.32564	0.0138996
transcript-124_52953_75PE	.	.	NA	NA	-4.0532	0.0364606
transcript-124_72229_75PE|m.72010	Pre-mRNA-processing factor 6;	Pre-mRNA-processing factor 6;	NA	NA	-3.95781	0.00819384
Myt_cherry_idba_rep_c12061|m.92947	Serine/threonine-protein phosphatase 2A 55 kDa regulatory subunit B alpha isoform;	Serine/threonine-protein phosphatase 2A 55 kDa regulatory subunit B alpha isoform;	NA	NA	-3.8201	0.0354453
transcript-124_10384_75PE|m.24382	Glyoxalase domain-containing protein 4;	.	NA	NA	-3.78766	0.0370685
transcript-124_21428_75PE|m.34339	Tropomyosin;	Tropomyosin;	NA	NA	-3.73805	0.0021185
R1_Contig4874	.	.	NA	NA	-3.66668	3.34635e-06
transcript-124_9001_75PE|m.23118	.	.	NA	NA	-3.59071	0.0021145
MinimusContig_97|m.132	Cathepsin L1;	Cathepsin L1;	NA	NA	-3.57846	0.00428683
transcript-124_34610_75PE|m.45188	.	.	NA	NA	-3.5427	0.0258542
transcript-124_17879_75PE	Sodium- and chloride-dependent GABA transporter 2;	.	NA	NA	-3.49743	0.000382011
Myt_cherry_idba_rep_c4223|m.90588	.	.	NA	NA	-3.46795	0.000103529
transcript-124_3414_75PE|m.17727	Sodium channel and clathrin linker 1;	Sodium channel and clathrin linker 1;	NA	NA	-3.46593	0.000229007
MinimusContig_790|m.1471	Dolichyl-diphosphooligosaccharide--protein glycosyltransferase subunit STT3B;	Dolichyl-diphosphooligosaccharide--protein glycosyltransferase subunit STT3B;	NA	NA	-3.45417	0.000468662
R1_Contig599|m.85217	.	.	NA	NA	-3.45406	0.000194266
Contig1033|m.11636	SWI/SNF-related matrix-associated actin-dependent regulator of chromatin subfamily A member 5;	Probable global transcription activator SNF2L1;	NA	NA	-3.42902	0.0150117
MinimusContig_6027|m.10165	.	.	NA	NA	-3.40013	0.0113633
transcript-124_66268_75PE|m.68223	Triosephosphate isomerase;	Triosephosphate isomerase;	NA	NA	-3.39451	0.000137924
transcript-124_23714_75PE|m.36346	.	.	NA	NA	-3.38285	0.00422882
transcript-124_3487_75PE|m.17843	E3 ubiquitin-protein ligase UBR4;	E3 ubiquitin-protein ligase UBR4;	NA	NA	-3.37906	0.0163027
transcript-124_68903_75PE|m.69884	.	Serine protease inhibitor Cvsi-2 {ECO:0000303|PubMed:19464375};	NA	NA	-3.37314	0.0621466
R1_Contig1219	.	.	NA	NA	-3.36676	0.000367296
MinimusContig_2263|m.4574	Protein phosphatase PTC7 homolog;	Protein phosphatase PTC7 homolog;	NA	NA	-3.33201	0.000367296
transcript-124_17667_75PE|m.31226	.	.	NA	NA	-3.30567	0.000406056
transcript-124_1661_75PE|m.15885	Transmembrane protein 136;	Transmembrane protein 136;	NA	NA	-3.26846	0.00116885
transcript-124_43141_75PE	.	.	NA	NA	-3.26309	1.52861e-05
R1_Contig5458|m.87848	Ribosome biogenesis protein BRX1 homolog;	Ribosome biogenesis protein BRX1 homolog;	NA	NA	-3.25819	0.015526
transcript-124_48086_75PE	.	.	NA	NA	-3.25692	0.0236431
R1_Contig8202|m.89553	Polypeptide N-acetylgalactosaminyltransferase 2;	Polypeptide N-acetylgalactosaminyltransferase 2;	NA	NA	-3.23888	0.000939708
transcript-124_67002_75PE|m.68694	.	.	NA	NA	-3.23527	0.0780518
transcript-124_13253_75PE|m.27223	Tumor susceptibility gene 101 protein;	Tumor susceptibility gene 101 protein;	NA	NA	-3.23429	8.93682e-05
MinimusContig_1309|m.1846	.	.	NA	NA	-3.23126	0.0386688
MinimusContig_5493	.	.	NA	NA	-3.21819	0.00524951
Contig14_capround1	.	.	NA	NA	-3.21661	0.000624914
R1_Contig8697|m.89767	NADH dehydrogenase [ubiquinone] 1 beta subcomplex subunit 2, mitochondrial;	NADH dehydrogenase [ubiquinone] 1 beta subcomplex subunit 2, mitochondrial;	NA	NA	-3.2119	0.00349673
Contig2874|m.13243	IST1 homolog;	IST1 homolog;	NA	NA	-3.21055	0.00269027
MinimusContig_5742	.	.	NA	NA	-3.19776	0.00563656
transcript-124_84341_75PE|m.79373	Intraflagellar transport protein 20 homolog A;	Intraflagellar transport protein 20 homolog B;	NA	NA	-3.19418	0.0326937
transcript-124_83923_75PE|m.79108	.	.	NA	NA	-3.16944	0.097088
R1_Contig5925|m.88087	.	28 kDa heat- and acid-stable phosphoprotein;	NA	NA	-3.15893	0.00245528
transcript-124_1211_75PE|m.15514	RAC serine/threonine-protein kinase;	RAC serine/threonine-protein kinase;	NA	NA	-3.15384	0.0128156
transcript-124_9631_75PE|m.23655	Cryptochrome DASH;	Cryptochrome DASH;	NA	NA	-3.12324	0.0153775
transcript-124_57428_75PE	.	.	NA	NA	-3.11888	0.0490038
transcript-124_31346_75PE|m.42719	Glutathione peroxidase 3;	Glutathione peroxidase {ECO:0000303|PubMed:23567855};	NA	NA	-3.11301	0.0163027
transcript-124_38732_75PE|m.48401	Polyadenylate-binding protein 1;	Polyadenylate-binding protein 1;	NA	NA	-3.08383	0.0352317
MinimusContig_774|m.1461	F-actin-capping protein subunit beta;	F-actin-capping protein subunit beta;	NA	NA	-3.06876	0.0114531
Contig484	.	.	NA	NA	-3.06198	6.71234e-05
transcript-124_41116_75PE|m.50121	.	.	NA	NA	-3.05823	0.00924537
transcript-124_2203_LongLar8	.	.	NA	NA	-3.05604	0.00024767
transcript-124_23482_75PE|m.36121	.	.	NA	NA	-3.05202	0.036409
Contig24|m.10499	Dolichyl-diphosphooligosaccharide--protein glycosyltransferase subunit DAD1;	Dolichyl-diphosphooligosaccharide--protein glycosyltransferase subunit DAD1;	NA	NA	-3.03566	0.0112313
transcript-124_27421_75PE|m.39454	.	.	NA	NA	-3.03127	0.0285298
transcript-124_35708_75PE	.	.	NA	NA	-3.00805	0.00295243
transcript-124_69715_75PE	.	.	NA	NA	-2.98344	0.0443668
R1_Contig718|m.85288	Gelsolin-like protein 1;	Gelsolin-like protein 1;	NA	NA	-2.97838	0.0246457
transcript-124_15522_75PE|m.29265	Protein FAM107A;	Protein FAM107A;	NA	NA	-2.95894	0.0387959
transcript-124_91453_75PE	.	.	NA	NA	-2.95865	0.00935116
transcript-124_4490_75PE	.	.	NA	NA	-2.95506	2.20664e-05
transcript-124_4659_75PE|m.19074	Phosphorylated adapter RNA export protein;	Phosphorylated adapter RNA export protein;	NA	NA	-2.94328	0.00066741
transcript-75_12131|m.93502	Kyphoscoliosis peptidase;	.	NA	NA	-2.94083	0.0440937
transcript-124_2393_75PE|m.16630	Fibronectin type-III domain-containing protein 3a;	Fibronectin type-III domain-containing protein 3a;	NA	NA	-2.94053	8.93682e-05
MinimusContig_5844|m.10005	E3 ubiquitin-protein ligase RNF213 {ECO:0000305};	E3 ubiquitin-protein ligase rnf213-alpha {ECO:0000305};	NA	NA	-2.93862	0.0374481
MinimusContig_5644	H/ACA ribonucleoprotein complex subunit 3;	.	NA	NA	-2.931	0.00647672
MinimusContig_3215|m.6478	Transcription factor GATA-4;	Transcription factor GATA-4;	NA	NA	-2.92317	0.002112
MinimusContig_3692|m.7356	Anoctamin-7;	Anoctamin-7;	NA	NA	-2.88234	0.0489291
transcript-124_23258_75PE	.	.	NA	NA	-2.87928	0.0180595
Contig2899|m.13255	Male-specific lethal 3 homolog;	Male-specific lethal 3 homolog;	NA	NA	-2.87927	0.014011
transcript-124_48310_75PE	.	.	NA	NA	-2.87204	0.0606199
transcript-124_19814_75PE|m.33061	Serum response factor;	Serum response factor;	NA	NA	-2.86679	0.036067
transcript-124_29453_75PE	.	.	NA	NA	-2.85432	0.0150729
transcript-124_38795_75PE	.	.	NA	NA	-2.84805	0.00654329
transcript-124_53930_75PE	.	.	NA	NA	-2.83651	1.6597e-05
transcript-124_6828_75PE|m.21068	Mitotic checkpoint serine/threonine-protein kinase BUB1 beta;	Mitotic checkpoint serine/threonine-protein kinase BUB1 beta;	NA	NA	-2.83511	0.00318102
transcript-124_60487_75PE	.	.	NA	NA	-2.83509	0.0294315
MinimusContig_3848|m.7600	Uncharacterized protein C3orf67 homolog;	Uncharacterized protein C3orf67 homolog;	NA	NA	-2.83459	0.0462911
transcript-124_88190_75PE|m.81616	.	.	NA	NA	-2.82787	0.0162158
MinimusContig_3599|m.7176	Striatin-interacting protein 1 homolog;	Striatin-interacting protein 1;	NA	NA	-2.81991	0.00433263
MinimusContig_141|m.306	Squamous cell carcinoma antigen recognized by T-cells 3 {ECO:0000305};	Squamous cell carcinoma antigen recognized by T-cells 3 {ECO:0000305};	NA	NA	-2.81947	8.93682e-05
MinimusContig_1845|m.3663	.	.	NA	NA	-2.80959	0.0288629
transcript-124_80435_75PE|m.77102	Sodium/calcium exchanger 1;	Sodium/calcium exchanger 1;	NA	NA	-2.80034	0.0432245
R1_Contig7768|m.89369	DnaJ homolog subfamily B member 13;	DnaJ homolog subfamily B member 13;	NA	NA	-2.78958	0.0307359
transcript-124_16434_75PE|m.30078	Glucose-6-phosphate exchanger SLC37A2 {ECO:0000305};	Glucose-6-phosphate exchanger SLC37A2 {ECO:0000305};	NA	NA	-2.77441	0.0254743
MinimusContig_1764|m.3447	.	.	NA	NA	-2.76258	8.93682e-05
transcript-124_687_75PE|m.14964	Snurportin-1;	Snurportin-1;	NA	NA	-2.75809	0.0394183
Contig2384|m.12773	.	.	NA	NA	-2.75423	0.00227015
transcript-124_5438_LongLar8	.	.	NA	NA	-2.74908	0.0261915
R1_Contig5513	.	.	NA	NA	-2.73218	0.00924537
transcript-124_20091_75PE|m.33266	Zinc finger protein castor homolog 1;	Zinc finger protein castor homolog 1;	NA	NA	-2.72042	0.0121284
Contig2683|m.13045	Protein NDRG3;	Protein NDRG3;	NA	NA	-2.71755	0.022924
MinimusContig_5984	.	.	NA	NA	-2.71712	0.00279801
MinimusContig_3494|m.6991	Large neutral amino acids transporter small subunit 2;	Large neutral amino acids transporter small subunit 2;	NA	NA	-2.71632	0.0142134
transcript-124_10384_75PE|m.24381	Glyoxalase domain-containing protein 4;	Glyoxalase domain-containing protein 4;	NA	NA	-2.70585	0.0100316
MinimusContig_2786	.	.	NA	NA	-2.70172	0.00115989
transcript-124_10960_75PE|m.25005	.	.	NA	NA	-2.70156	0.0137196
transcript-124_49931_75PE	.	.	NA	NA	-2.70009	0.0326414
Contig2498|m.12869	.	.	NA	NA	-2.69105	0.0038883
transcript-124_11578_75PE|m.25591	Homeobox protein otx5;	Cone-rod homeobox protein;	NA	NA	-2.68977	0.0260657
Contig3005|m.13343	Dihydropyrimidinase;	Dihydropyrimidinase;	NA	NA	-2.68156	0.00479916
MinimusContig_2054|m.4097	Short-chain specific acyl-CoA dehydrogenase, mitochondrial;	Short-chain specific acyl-CoA dehydrogenase, mitochondrial;	NA	NA	-2.67362	0.0500597
Contig3538|m.13767	5'-AMP-activated protein kinase subunit beta-1;	5'-AMP-activated protein kinase subunit beta-1;	NA	NA	-2.67359	0.0159552
transcript-124_2409_75PE|m.16658	Transcriptional repressor CTCF;	Transcriptional repressor CTCF;	NA	NA	-2.64948	1.52861e-05
transcript-124_77374_75PE	.	.	NA	NA	-2.64796	0.0456808
transcript-124_93348_75PE	.	.	NA	NA	-2.64548	0.0959023
transcript-124_66928_75PE|m.68641	.	.	NA	NA	-2.64243	0.0937887
transcript-124_10468_75PE|m.24461	Sulfotransferase family cytosolic 1B member 1;	Sulfotransferase family cytosolic 1B member 1;	NA	NA	-2.63712	0.0288029
transcript-124_12082_LongLar8	.	.	NA	NA	-2.62847	0.0875414
transcript-124_49897_75PE	.	.	NA	NA	-2.62123	0.0566136
transcript-124_19931_75PE|m.33142	SEC23-interacting protein;	SEC23-interacting protein;	NA	NA	-2.61745	0.0127855
R1_Contig3538|m.87023	Nitric oxide synthase-interacting protein;	Nitric oxide synthase-interacting protein;	NA	NA	-2.61506	0.0446801
R1_Contig5418|m.87825	Nucleolar GTP-binding protein 1;	Nucleolar GTP-binding protein 1;	NA	NA	-2.6073	0.0143489
MinimusContig_4919|m.9117	Uncharacterized protein C05D11.1;	Uncharacterized protein C05D11.1;	NA	NA	-2.60685	0.0135244
transcript-124_14078_75PE|m.28010	Glutamate dehydrogenase 1, mitochondrial;	Glutamate dehydrogenase 1, mitochondrial;	NA	NA	-2.60415	0.00685303
transcript-124_9106_75PE|m.23186	.	N-myc-interactor;	NA	NA	-2.60005	0.00318928
transcript-124_28787_75PE|m.40619	.	.	NA	NA	-2.59615	0.000231341
MinimusContig_2870|m.5870	Lipoxygenase homology domain-containing protein 1;	.	NA	NA	-2.59562	0.0331427
transcript-124_40893_75PE	.	.	NA	NA	-2.5863	0.0358376
transcript-124_6663_75PE|m.20916	Coiled-coil domain-containing protein 39;	Coiled-coil domain-containing protein 39;	NA	NA	-2.58593	0.00236327
transcript-124_12246_75PE|m.26274	Kielin/chordin-like protein;	Kielin/chordin-like protein;	NA	NA	-2.58237	0.00215521
transcript-124_74190_75PE|m.73248	Matrilin-2;	Matrilin-2;	NA	NA	-2.57379	0.0428873
transcript-124_28081_75PE|m.40002	2-(3-amino-3-carboxypropyl)histidine synthase subunit 1 {ECO:0000305};	2-(3-amino-3-carboxypropyl)histidine synthase subunit 1 {ECO:0000305};	NA	NA	-2.56741	0.011293
transcript-124_57052_75PE|m.61938	.	.	NA	NA	-2.56676	0.0601115
transcript-124_28805_75PE|m.40630	.	.	NA	NA	-2.56148	0.0193592
transcript-124_36783_75PE|m.46871	Pendrin;	Pendrin;	NA	NA	-2.56127	0.0472559
Myt_cherry_idba_rep_c9056	.	.	NA	NA	-2.53814	0.0814068
MinimusContig_2249|m.4534	Retinal-binding protein;	Retinal-binding protein;	NA	NA	-2.5369	0.0193592
transcript-124_2784_75PE|m.17092	Ribosomal protein S6 kinase alpha-3;	Ribosomal protein S6 kinase alpha-3;	NA	NA	-2.5352	0.0674604
MinimusContig_1365|m.2093	cGMP-inhibited 3',5'-cyclic phosphodiesterase A;	cGMP-inhibited 3',5'-cyclic phosphodiesterase A;	NA	NA	-2.53117	0.0279941
transcript-124_16639_75PE|m.30255	Laminin subunit alpha;	Laminin subunit alpha;	NA	NA	-2.53117	0.00685303
transcript-124_39869_75PE|m.49181	Ribosomal RNA processing protein 36 homolog;	Ribosomal RNA processing protein 36 homolog;	NA	NA	-2.52475	0.056727
Contig957|m.11557	Rho-associated protein kinase 2;	Rho-associated protein kinase 2;	NA	NA	-2.52245	0.00190049
Contig2376|m.12763	Growth arrest-specific protein 8;	Growth arrest-specific protein 8;	NA	NA	-2.51733	0.00296725
MinimusContig_2776|m.5671	Dynein heavy chain 5, axonemal;	Dynein heavy chain 5, axonemal;	NA	NA	-2.51216	0.0259874
R1_Contig825|m.85358	Coiled-coil domain-containing protein 81;	Coiled-coil domain-containing protein 81;	NA	NA	-2.50141	0.0827266
MinimusContig_5478|m.9688	.	.	NA	NA	-2.49272	0.0386688
transcript-124_17931_75PE|m.31480	Titin;	Titin;	NA	NA	-2.48674	0.0133915
transcript-124_34986_75PE	.	.	NA	NA	-2.47362	0.000328733
transcript-124_2807_75PE|m.17108	.	.	NA	NA	-2.457	0.0379499
Contig1391|m.11987	Prestin;	Prestin;	NA	NA	-2.45326	0.00346669
Contig3060|m.13395	ATP-binding cassette sub-family A member 5;	ATP-binding cassette sub-family A member 5;	NA	NA	-2.43497	0.0400043
transcript-124_35406_75PE	.	.	NA	NA	-2.43441	0.00619803
MinimusContig_2124|m.4245	Dynamin-like 120 kDa protein, mitochondrial;	Dynamin-like 120 kDa protein, mitochondrial;	NA	NA	-2.43131	0.0260657
R1_Contig8047	.	.	NA	NA	-2.42949	0.00022119
R1_Contig7958|m.89450	1,2-dihydroxy-3-keto-5-methylthiopentene dioxygenase {ECO:0000255|HAMAP-Rule:MF_03154};	1,2-dihydroxy-3-keto-5-methylthiopentene dioxygenase {ECO:0000255|HAMAP-Rule:MF_03154};	NA	NA	-2.42563	0.00829639
Contig2511|m.12879	.	Natterin-like protein;	NA	NA	-2.4247	0.0294807
R1_Contig8511	.	.	NA	NA	-2.41499	0.0979679
transcript-124_7930_75PE|m.22099	.	.	NA	NA	-2.41204	0.0222912
R1_Contig1517|m.85864	Beta-hexosaminidase subunit beta;	Beta-hexosaminidase A;	NA	NA	-2.40894	0.0957896
Contig2210|m.12629	THO complex subunit 4-A;	Aly/REF export factor 2;	NA	NA	-2.40382	0.00340657
transcript-124_31055_75PE	.	.	NA	NA	-2.40328	0.0513575
transcript-124_21212_75PE	.	.	NA	NA	-2.40233	0.0233833
MinimusContig_2021|m.4019	Zinc finger protein 474;	Zinc finger protein 474;	NA	NA	-2.40077	0.0342249
Contig25_capround1|m.10395	Endoplasmic reticulum resident protein 44;	Endoplasmic reticulum resident protein 44;	NA	NA	-2.39806	0.0249714
R1_Contig1841	.	.	NA	NA	-2.39779	4.16609e-05
MinimusContig_1343|m.1919	Titin;	Titin;	NA	NA	-2.38106	0.0018533
transcript-124_2806_75PE|m.17106	LINE-1 retrotransposable element ORF2 protein;	.	NA	NA	-2.37929	0.0326414
MinimusContig_2401	.	.	NA	NA	-2.37176	0.00022119
MinimusContig_4277	.	.	NA	NA	-2.36888	0.000355991
R2_Contig171|m.84633	Aminopeptidase N {ECO:0000305};	Aminopeptidase Ey {ECO:0000303|PubMed:9734335};	NA	NA	-2.36179	0.0415917
R1_Contig7603	.	.	NA	NA	-2.35859	0.0216178
transcript-124_12499_75PE|m.26492	Cysteine-rich venom protein triflin;	Cysteine-rich venom protein triflin;	NA	NA	-2.3547	0.0800793
MinimusContig_378|m.808	Collagen alpha-6(VI) chain;	Collagen alpha-6(VI) chain;	NA	NA	-2.35323	0.00685303
transcript-124_12367_75PE|m.26341	U3 small nucleolar RNA-associated protein 14 homolog A;	U3 small nucleolar RNA-associated protein 14 homolog A;	NA	NA	-2.3518	0.00477477
Myt_cherry_idba_c7160|m.91573	Ribonuclease H2 subunit B;	Ribonuclease H2 subunit B;	NA	NA	-2.34915	0.00464919
transcript-124_38837_75PE|m.48473	von Willebrand factor D and EGF domain-containing protein;	von Willebrand factor D and EGF domain-containing protein;	NA	NA	-2.34361	0.0465417
transcript-124_42588_75PE|m.51309	Protein SFI1 homolog;	Protein SFI1 homolog;	NA	NA	-2.33853	0.0662531
R1_Contig167	.	.	NA	NA	-2.33749	0.03506
Contig10	.	.	NA	NA	-2.33158	0.00777615
MinimusContig_3388|m.6806	.	.	NA	NA	-2.33118	0.0487453
transcript-124_22184_75PE|m.34943	RRP15-like protein;	RRP15-like protein;	NA	NA	-2.32569	0.0896157
Myt_cherry_idba_rep_c5158	.	.	NA	NA	-2.32562	0.0124655
transcript-124_13188_75PE|m.27168	Scaffold attachment factor B2;	Scaffold attachment factor B1;	NA	NA	-2.32512	0.0194875
transcript-124_13850_75PE	CDC42 small effector protein 2;	.	NA	NA	-2.3239	0.00423885
Contig289|m.10754	Tetratricopeptide repeat protein 12;	Tetratricopeptide repeat protein 12;	NA	NA	-2.32159	0.00615953
R1_Contig568|m.85204	Hydroxysteroid dehydrogenase-like protein 2;	Hydroxysteroid dehydrogenase-like protein 2;	NA	NA	-2.32071	0.0395369
R1_Contig7343	.	.	NA	NA	-2.31458	0.0176461
R2_Contig90|m.84585	.	.	NA	NA	-2.31337	0.0261915
transcript-124_11572_75PE|m.25586	.	.	NA	NA	-2.31297	0.0282635
transcript-124_46122_75PE|m.53858	.	.	NA	NA	-2.30614	0.0885915
R2_Contig211	.	.	NA	NA	-2.30414	0.000187792
MinimusContig_650	.	.	NA	NA	-2.30041	0.00224143
MinimusContig_169|m.387	Protein delta homolog 2;	Protein delta homolog 2;	NA	NA	-2.29425	0.00685303
MinimusContig_1734|m.3355	Pogo transposable element with ZNF domain;	Pogo transposable element with ZNF domain;	NA	NA	-2.29384	0.000188404
transcript-124_11083_75PE|m.25126	.	.	NA	NA	-2.28844	0.0170618
transcript-124_3562_75PE|m.17922	Atrial natriuretic peptide receptor 1;	Atrial natriuretic peptide receptor 1;	NA	NA	-2.27947	0.023705
transcript-124_18705_75PE	.	.	NA	NA	-2.27645	0.0155756
Contig3179	.	.	NA	NA	-2.27236	0.0507268
transcript-124_9009_75PE|m.23121	Prosaposin;	Prosaposin;	NA	NA	-2.27105	0.00685303
transcript-124_39763_75PE	.	.	NA	NA	-2.25862	0.000445719
transcript-124_32529_75PE	.	.	NA	NA	-2.25807	0.00902385
transcript-124_33790_75PE	.	.	NA	NA	-2.25786	0.011293
Contig790|m.11353	.	.	NA	NA	-2.25383	0.0808078
transcript-124_47305_75PE	.	.	NA	NA	-2.25333	0.0105043
transcript-124_40007_75PE	.	.	NA	NA	-2.24784	0.0135244
transcript-124_4238_75PE|m.18580	cTAGE family member 5 {ECO:0000312|MGI:MGI:1346056};	Melanoma inhibitory activity protein 3;	NA	NA	-2.24461	0.0400043
transcript-124_15349_75PE|m.29121	E3 ubiquitin-protein ligase UBR5;	E3 ubiquitin-protein ligase UBR5;	NA	NA	-2.24204	0.0195036
transcript-124_53357_75PE|m.59320	Perlucin-like protein {ECO:0000303|PubMed:21643827};	Aggrecan core protein;	NA	NA	-2.23728	0.0769458
transcript-124_22942_75PE|m.35632	.	.	NA	NA	-2.22408	0.0383969
Myt_cherry_idba_c3703	Transmembrane protein 231;	.	NA	NA	-2.22268	0.0261128
R1_Contig894|m.85411	Pituitary tumor-transforming gene 1 protein-interacting protein;	Pituitary tumor-transforming gene 1 protein-interacting protein;	NA	NA	-2.21814	0.0275546
R1_Contig8352	.	.	NA	NA	-2.21696	0.0961755
transcript-124_29494_75PE|m.41195	E3 ubiquitin-protein ligase E3D;	E3 ubiquitin-protein ligase E3D;	NA	NA	-2.21644	0.0202102
Myt_cherry_idba_rep_c3950|m.90517	Betaine--homocysteine S-methyltransferase 1;	Betaine--homocysteine S-methyltransferase 1;	NA	NA	-2.21282	0.0487051
transcript-124_45214_75PE|m.53227	.	.	NA	NA	-2.20485	0.0699394
transcript-124_4724_75PE|m.19120	.	.	NA	NA	-2.20377	0.0246457
transcript-124_36332_75PE|m.46529	Zinc transporter SLC39A7;	Zinc transporter SLC39A7;	NA	NA	-2.20336	0.0759898
MinimusContig_1250	.	.	NA	NA	-2.20195	0.0358622
Myt_cherry_idba_rep_c2224|m.90180	X-box-binding protein 1 {ECO:0000250|UniProtKB:P17861};	X-box-binding protein 1 {ECO:0000250|UniProtKB:P17861};	NA	NA	-2.20139	0.0793719
transcript-124_1318_75PE|m.15614	Nuclear factor related to kappa-B-binding protein;	Nuclear factor related to kappa-B-binding protein;	NA	NA	-2.19684	0.00284113
transcript-124_64169_75PE	.	.	NA	NA	-2.19254	0.0871908
transcript-124_16648_75PE	.	.	NA	NA	-2.19027	0.0984492
Contig2139|m.12567	.	.	NA	NA	-2.18797	0.0906013
Myt_cherry_idba_c8906|m.92094	.	.	NA	NA	-2.18172	0.0217417
MinimusContig_3640	.	.	NA	NA	-2.18146	0.0330956
Myt_cherry_idba_rep_c12154	.	.	NA	NA	-2.1814	0.0193592
Myt_cherry_idba_rep_c11708|m.92849	Alcohol dehydrogenase class-3 chain L;	Alcohol dehydrogenase class-3 chain L;	NA	NA	-2.18125	0.00703744
transcript-124_5133_75PE|m.19470	Dachshund homolog 1;	Dachshund homolog 1;	NA	NA	-2.18066	0.0302681
R1_Contig2582	.	.	NA	NA	-2.17767	0.0566136
Contig1398	.	.	NA	NA	-2.17651	0.0238964
transcript-124_12885_75PE|m.26894	Probable ATP-dependent RNA helicase DDX47;	Probable ATP-dependent RNA helicase DDX47;	NA	NA	-2.16292	0.00685303
Contig219|m.10667	Fibronectin type-III domain-containing protein 3a;	Fibronectin type-III domain-containing protein 3a;	NA	NA	-2.16158	0.0217141
MinimusContig_1994|m.3967	Dystonin;	Dystonin;	NA	NA	-2.16014	0.0206151
MinimusContig_6155	.	.	NA	NA	-2.15651	0.0693853
transcript-124_9235_75PE|m.23314	Centrosomal protein of 70 kDa;	Centrosomal protein of 70 kDa;	NA	NA	-2.155	0.0237046
transcript-124_1564_75PE|m.15829	Sodium-coupled neutral amino acid transporter 9 homolog;	Sodium-coupled neutral amino acid transporter 9 homolog;	NA	NA	-2.15333	0.00845526
transcript-124_2712_75PE|m.17017	Protein Jade-3;	Protein Jade-1;	NA	NA	-2.14553	0.0018533
transcript-124_20647_75PE|m.33748	.	.	NA	NA	-2.1438	0.0307842
R1_Contig3211	.	.	NA	NA	-2.14079	0.0260657
transcript-124_22942_75PE|m.35631	.	.	NA	NA	-2.13644	0.0497218
transcript-124_29499_75PE	.	.	NA	NA	-2.13215	0.026909
R1_Contig3822|m.87178	Death-associated inhibitor of apoptosis 2;	E3 ubiquitin-protein ligase XIAP;	NA	NA	-2.12935	0.00510999
MinimusContig_2406|m.4870	.	.	NA	NA	-2.12909	0.0240893
transcript-124_51494_75PE	.	.	NA	NA	-2.12497	0.0984492
transcript-124_17850_75PE	.	.	NA	NA	-2.12062	0.0732974
transcript-124_28587_75PE	.	.	NA	NA	-2.1186	0.0260657
MinimusContig_2490|m.5029	.	.	NA	NA	-2.11669	0.000160538
Contig2121|m.12555	Methyltransferase-like protein 27 {ECO:0000312|HGNC:HGNC:19068};	Methyltransferase-like protein 27 {ECO:0000312|HGNC:HGNC:19068};	NA	NA	-2.11608	0.0405387
transcript-124_29208_75PE	.	.	NA	NA	-2.11055	0.0110585
transcript-124_28896_75PE|m.40700	Coiled-coil domain-containing protein 9;	Coiled-coil domain-containing protein 9;	NA	NA	-2.10142	0.047444
Contig2305	.	.	NA	NA	-2.08858	0.0651554
transcript-124_17161_75PE|m.30704	Helicase with zinc finger domain 2;	Helicase with zinc finger domain 2;	NA	NA	-2.08829	0.0453416
transcript-124_19071_75PE|m.32462	Regulator of G-protein signaling 3;	Regulator of G-protein signaling 3;	NA	NA	-2.08404	0.00372602
R1_Contig7737	.	.	NA	NA	-2.08334	0.0609817
R1_Contig306|m.85045	Dolichyl-diphosphooligosaccharide--protein glycosyltransferase 48 kDa subunit;	Dolichyl-diphosphooligosaccharide--protein glycosyltransferase 48 kDa subunit;	NA	NA	-2.08326	0.0352766
transcript-124_37246_75PE	.	.	NA	NA	-2.07895	0.0462887
MinimusContig_2720|m.5552	tRNA 2'-phosphotransferase 1;	tRNA 2'-phosphotransferase 1;	NA	NA	-2.07396	0.0298519
transcript-124_33381_75PE	.	.	NA	NA	-2.07394	0.0202125
transcript-124_3779_75PE|m.18106	Voltage-dependent calcium channel type D subunit alpha-1;	Voltage-dependent L-type calcium channel subunit alpha-1C;	NA	NA	-2.06697	0.0415917
transcript-124_20919_75PE	.	.	NA	NA	-2.06623	0.0169297
transcript-124_30433_75PE|m.41935	Nicotinate-nucleotide pyrophosphorylase [carboxylating];	Nicotinate-nucleotide pyrophosphorylase [carboxylating];	NA	NA	-2.05341	0.00888939
MinimusContig_3568|m.7135	Dynamin-binding protein;	Dynamin-binding protein;	NA	NA	-2.04536	0.0145141
R1_Contig2053	.	.	NA	NA	-2.04525	0.0778121
Contig36_capround1|m.10407	Sodium/calcium exchanger 2;	Sodium/calcium exchanger 2;	NA	NA	-2.04435	0.0103729
transcript-124_44831_75PE	.	.	NA	NA	-2.04214	0.0164155
transcript-124_28809_75PE|m.40633	.	.	NA	NA	-2.04028	0.0353539
transcript-124_22588_75PE|m.35350	Fatty acid-binding protein, brain;	Fatty acid-binding protein, brain;	NA	NA	-2.03994	0.0812257
transcript-124_27953_75PE|m.39893	Protein NDNF;	Protein NDNF;	NA	NA	-2.03531	0.0276332
R1_Contig4056|m.87305	MICAL-like protein 2;	MICAL-like protein 2;	NA	NA	-2.03238	0.0792058
transcript-124_19227_75PE|m.32578	Plectin;	Plectin;	NA	NA	-2.03123	0.0609817
transcript-124_40650_75PE|m.49748	Glycine, glutamate and proline-rich protein;	Glycine, glutamate and proline-rich protein;	NA	NA	-2.02775	0.0863056
transcript-124_12038_75PE|m.26053	Uroporphyrinogen decarboxylase;	Uroporphyrinogen decarboxylase;	NA	NA	-2.02757	0.0639784
Contig2980|m.13316	Seipin;	Seipin;	NA	NA	-2.02514	0.0689433
R1_Contig708|m.85285	.	.	NA	NA	-2.02006	0.0715794
transcript-124_5598_75PE	.	.	NA	NA	-2.01672	0.0379499
transcript-124_18719_75PE|m.32155	Serine protease inhibitor dipetalogastin;	Serine protease inhibitor dipetalogastin;	NA	NA	-2.01504	0.0453219
transcript-124_39246_75PE|m.48715	.	.	NA	NA	-2.00892	0.0905046
transcript-124_33801_75PE	.	.	NA	NA	-2.00877	0.0654556
transcript-124_44765_75PE|m.52947	Neural proliferation differentiation and control protein 1;	Neural proliferation differentiation and control protein 1;	NA	NA	-2.00864	0.0800793
Myt_cherry_idba_rep_c1716	.	.	NA	NA	-1.99317	0.00284411
MinimusContig_2971|m.6063	.	E3 ubiquitin-protein ligase RNF8 {ECO:0000255|HAMAP-Rule:MF_03067};	NA	NA	-1.98682	0.0780518
MinimusContig_1411|m.2262	Cyclin-T2 {ECO:0000303|PubMed:23060074};	Cyclin-T1;	NA	NA	-1.98493	0.00685303
transcript-124_41270_75PE	.	.	NA	NA	-1.98369	0.0411059
transcript-124_24495_75PE	.	.	NA	NA	-1.9835	0.0179347
MinimusContig_284|m.610	Endoplasmic reticulum mannosyl-oligosaccharide 1,2-alpha-mannosidase;	Endoplasmic reticulum mannosyl-oligosaccharide 1,2-alpha-mannosidase;	NA	NA	-1.98239	0.022156
transcript-124_9689_75PE|m.23710	Protein KRI1 homolog;	Protein KRI1 homolog;	NA	NA	-1.98205	0.032746
MinimusContig_1031	.	.	NA	NA	-1.98072	0.0115986
transcript-124_25971_75PE|m.38253	Protein ABHD14A {ECO:0000305};	Protein ABHD14A {ECO:0000305};	NA	NA	-1.97931	0.0579344
transcript-124_65602_75PE|m.67827	.	.	NA	NA	-1.97837	0.0808078
transcript-124_18593_75PE|m.32048	.	Transcription factor GATA-4;	NA	NA	-1.97614	0.0595321
transcript-124_53737_75PE|m.59600	Agrin;	Agrin;	NA	NA	-1.97329	0.0431695
R1_Contig1245|m.85652	Coatomer subunit delta;	Coatomer subunit delta;	NA	NA	-1.97202	0.0763699
transcript-124_30733_75PE	.	.	NA	NA	-1.97019	0.0800595
MinimusContig_4612	.	.	NA	NA	-1.96433	0.00198628
R1_Contig3555|m.87036	Homeobox protein Meis1;	Homeobox protein Meis1;	NA	NA	-1.96219	0.0243749
transcript-124_46650_75PE	.	.	NA	NA	-1.96035	0.0823906
R1_Contig911	.	.	NA	NA	-1.9581	0.0925773
transcript-124_29861_75PE	.	.	NA	NA	-1.95739	0.050894
transcript-124_29324_75PE|m.41071	.	.	NA	NA	-1.94544	0.0613876
R2_Contig224|m.84677	Storkhead-box protein 1;	Storkhead-box protein 1;	NA	NA	-1.9441	0.0155756
transcript-124_8134_75PE|m.22292	Pre-mRNA-splicing factor 18;	Pre-mRNA-splicing factor 18;	NA	NA	-1.94194	0.068571
transcript-124_16292_75PE|m.29975	Solute carrier family 22 member 3;	Solute carrier family 22 member 3;	NA	NA	-1.93319	0.0632849
MinimusContig_787|m.1470	Vacuolar protein sorting-associated protein 13D;	Vacuolar protein sorting-associated protein 13D;	NA	NA	-1.92874	0.00891392
transcript-124_18291_75PE	.	.	NA	NA	-1.9253	0.0118773
R1_Contig31|m.84877	.	.	NA	NA	-1.92479	0.0055536
MinimusContig_2574	.	.	NA	NA	-1.92234	0.0249238
R2_Contig28	Homeodomain-only protein;	.	NA	NA	-1.91833	0.00856434
transcript-124_2861_75PE|m.17146	.	Clustered mitochondria protein homolog {ECO:0000255|HAMAP-Rule:MF_03013};	NA	NA	-1.91192	0.0133838
transcript-124_6414_75PE|m.20669	Syntaxin-binding protein 1;	Syntaxin-binding protein 1;	NA	NA	-1.90712	0.0877275
R1_Contig5266	.	.	NA	NA	-1.89977	0.0808078
transcript-124_43464_75PE	.	.	NA	NA	-1.89903	0.0446801
MinimusContig_3103|m.6304	E3 ubiquitin-protein ligase HERC2;	E3 ubiquitin-protein ligase HERC2;	NA	NA	-1.89576	0.056963
R1_Contig6494|m.88428	Innexin unc-9;	Innexin unc-9;	NA	NA	-1.89398	0.0678601
transcript-124_25523_75PE|m.37916	E3 ubiquitin-protein ligase TRIM56;	E3 ubiquitin-protein ligase TRIM56;	NA	NA	-1.89319	0.0394183
transcript-124_6158_75PE	.	.	NA	NA	-1.89234	0.0705883
transcript-124_16099_75PE|m.29826	Transmembrane protein 145;	Transmembrane protein 145;	NA	NA	-1.89205	0.0648868
transcript-124_2482_75PE|m.16744	Major egg antigen;	Major egg antigen;	NA	NA	-1.89116	0.0871908
MinimusContig_400|m.881	.	.	NA	NA	-1.88448	0.0877037
transcript-124_10451_75PE	.	.	NA	NA	-1.88423	0.0863056
MinimusContig_1143	.	.	NA	NA	-1.88161	0.0178046
Myt_cherry_idba_rep_c4018|m.90538	6-phosphogluconolactonase {ECO:0000250|UniProtKB:O95336};	6-phosphogluconolactonase {ECO:0000250|UniProtKB:O95336};	NA	NA	-1.87982	0.00710075
MinimusContig_784	.	.	NA	NA	-1.8798	0.00615106
Contig3138|m.13456	Mini-chromosome maintenance complex-binding protein;	Mini-chromosome maintenance complex-binding protein;	NA	NA	-1.87845	0.0386513
Myt_cherry_idba_rep_c8410|m.91967	.	.	NA	NA	-1.86709	0.00976443
R1_Contig8464|m.89688	Tubulin beta chain;	Tubulin beta chain;	NA	NA	-1.86144	0.0544655
transcript-124_15334_75PE	.	.	NA	NA	-1.85758	0.0707675
MinimusContig_3106	.	.	NA	NA	-1.85618	0.00589719
transcript-124_36189_75PE|m.46420	WD repeat-containing protein 61;	WD repeat-containing protein 61;	NA	NA	-1.8542	0.0591776
transcript-124_26556_75PE	.	.	NA	NA	-1.84931	0.0337961
transcript-124_8382_75PE|m.22488	Alkaline phosphatase, tissue-nonspecific isozyme;	Alkaline phosphatase, tissue-nonspecific isozyme;	NA	NA	-1.84842	0.0197058
MinimusContig_5532|m.9730	Peptidyl-prolyl cis-trans isomerase FKBP14;	Peptidyl-prolyl cis-trans isomerase FKBP14;	NA	NA	-1.8474	0.0980252
transcript-124_28950_75PE	.	.	NA	NA	-1.84637	0.0678601
MinimusContig_3803	.	.	NA	NA	-1.84604	0.0174298
R1_Contig6838	.	.	NA	NA	-1.84376	0.00224099
MinimusContig_2756|m.5631	Nucleosome assembly protein 1-like 1;	Nucleosome assembly protein 1-like 4;	NA	NA	-1.84115	0.0573901
transcript-124_7341_75PE|m.21566	REST corepressor 3;	REST corepressor 3;	NA	NA	-1.84043	0.0815261
MinimusContig_1008	.	.	NA	NA	-1.83925	0.0501455
transcript-124_25454_75PE|m.37846	Low-density lipoprotein receptor-related protein 5;	Low-density lipoprotein receptor-related protein 5;	NA	NA	-1.83481	0.0224413
transcript-124_38583_75PE	.	.	NA	NA	-1.83366	0.0394183
R1_Contig6929|m.88829	E3 ubiquitin-protein ligase TRIM71;	E3 ubiquitin-protein ligase TRIM71;	NA	NA	-1.8336	0.0449684
Contig589|m.11137	.	.	NA	NA	-1.83072	0.0387959
transcript-124_40770_75PE	.	.	NA	NA	-1.82794	0.0457114
Contig3356	.	.	NA	NA	-1.8226	0.0952737
transcript-124_14895_75PE|m.28715	.	.	NA	NA	-1.81105	0.0083297
R1_Contig6961	.	.	NA	NA	-1.80641	0.00462172
transcript-124_13315_75PE	.	.	NA	NA	-1.80342	0.00238723
R1_Contig7231|m.89046	26S proteasome non-ATPase regulatory subunit 12;	26S proteasome non-ATPase regulatory subunit 12;	NA	NA	-1.80255	0.0929727
MinimusContig_4782|m.8940	.	.	NA	NA	-1.80079	0.0714918
transcript-124_21466_75PE|m.34360	Tetraspanin-7;	Tetraspanin-7;	NA	NA	-1.80073	0.0431695
Myt_cherry_idba_rep_c1301	.	.	NA	NA	-1.79572	0.0539305
transcript-124_19038_75PE|m.32436	.	.	NA	NA	-1.79319	0.0150117
transcript-124_1009_75PE|m.15295	Putative ferric-chelate reductase 1 homolog;	Putative ferric-chelate reductase 1 homolog;	NA	NA	-1.79248	0.051668
transcript-124_3920_75PE|m.18222	FAS-associated factor 1;	FAS-associated factor 1;	NA	NA	-1.79201	0.0440482
MinimusContig_813|m.1492	Leucine-rich repeat-containing protein 24;	Protein slit;	NA	NA	-1.79171	0.0365872
transcript-124_47978_75PE	.	.	NA	NA	-1.79008	0.072988
Myt_cherry_idba_c7224|m.91596	Bystin;	Bystin;	NA	NA	-1.78716	0.00924537
transcript-124_7342_75PE|m.21568	Core-binding factor subunit beta;	Core-binding factor subunit beta;	NA	NA	-1.78288	0.0600737
transcript-124_26099_75PE|m.38368	.	.	NA	NA	-1.78276	0.00685303
transcript-124_30502_75PE|m.42021	Gem-associated protein 8;	Gem-associated protein 8;	NA	NA	-1.78062	0.037932
transcript-124_24_75PE|m.14134	E3 ubiquitin-protein ligase TRIM71;	E3 ubiquitin-protein ligase TRIM71;	NA	NA	-1.78024	0.0141493
transcript-124_16958_75PE	.	.	NA	NA	-1.7796	0.0500287
MinimusContig_1569|m.2824	CUGBP Elav-like family member 4;	CUGBP Elav-like family member 4;	NA	NA	-1.7774	0.0601487
transcript-124_33144_75PE	U6 snRNA-associated Sm-like protein LSm8;	.	NA	NA	-1.77538	0.0105043
Myt_cherry_idba_rep_c9814	.	.	NA	NA	-1.77471	0.00569108
R1_Contig5917|m.88079	Alpha-taxilin;	Alpha-taxilin;	NA	NA	-1.77401	0.0601209
Contig2432	Acyl-CoA-binding protein;	.	NA	NA	-1.77228	0.0277146
Contig2589|m.12943	Cilia- and flagella-associated protein 91 {ECO:0000305};	Cilia- and flagella-associated protein 91 {ECO:0000305};	NA	NA	-1.76878	0.0338298
Myt_cherry_idba_rep_c1446	.	.	NA	NA	-1.76861	0.0341087
transcript-124_45213_75PE|m.53225	Neuroglian;	Neuroglian;	NA	NA	-1.76842	0.0297935
transcript-124_57916_75PE	.	.	NA	NA	-1.76766	0.0446245
Contig3090|m.13411	Pre-mRNA-splicing factor RBM22;	Pre-mRNA-splicing factor RBM22;	NA	NA	-1.76708	0.0782654
transcript-124_11965_75PE	.	.	NA	NA	-1.76142	0.0537906
transcript-124_12116_75PE|m.26105	Galactoside 2-alpha-L-fucosyltransferase 1;	Galactoside 2-alpha-L-fucosyltransferase 1;	NA	NA	-1.75964	0.0228035
transcript-124_2643_75PE|m.16947	Coiled-coil domain-containing protein AGAP005037;	Coiled-coil domain-containing protein AGAP005037;	NA	NA	-1.75621	0.00340657
Contig1103	.	.	NA	NA	-1.75474	0.00165563
transcript-124_23940_75PE|m.36531	.	.	NA	NA	-1.75272	0.078767
transcript-124_21636_75PE|m.34484	.	.	NA	NA	-1.7488	0.0800296
R1_Contig6974	.	.	NA	NA	-1.74853	0.0408275
transcript-124_1640_75PE	.	.	NA	NA	-1.74653	0.00650142
transcript-124_14274_75PE|m.28173	.	.	NA	NA	-1.74471	0.0716799
Contig779|m.11345	DNA repair protein complementing XP-C cells;	DNA repair protein complementing XP-C cells homolog;	NA	NA	-1.73961	0.0326414
transcript-124_49331_75PE	.	.	NA	NA	-1.73685	0.0992832
transcript-124_12932_75PE|m.26930	.	.	NA	NA	-1.73454	0.0448665
transcript-124_8720_75PE|m.22881	Solute carrier family 13 member 5;	Solute carrier family 13 member 3;	NA	NA	-1.72751	0.0172353
transcript-124_14410_75PE	.	.	NA	NA	-1.72028	0.0621905
transcript-124_9121_75PE|m.23216	Polypeptide N-acetylgalactosaminyltransferase 5;	Polypeptide N-acetylgalactosaminyltransferase 5;	NA	NA	-1.71717	0.0881447
R1_Contig1019	.	.	NA	NA	-1.71638	0.0238129
transcript-124_55352_75PE	.	.	NA	NA	-1.71416	0.0433902
transcript-124_20496_75PE	.	.	NA	NA	-1.70422	0.0673847
transcript-124_63927_75PE	.	.	NA	NA	-1.7034	0.0880078
Contig336|m.10824	Dual serine/threonine and tyrosine protein kinase {ECO:0000303|PubMed:17123648};	Dual serine/threonine and tyrosine protein kinase {ECO:0000303|PubMed:17123648};	NA	NA	-1.6988	0.0591776
MinimusContig_2491|m.5035	.	.	NA	NA	-1.69709	0.0416672
Contig2442|m.12816	Small nuclear ribonucleoprotein-associated protein B';	Small nuclear ribonucleoprotein-associated protein B';	NA	NA	-1.69433	0.0909886
MinimusContig_3250|m.6545	.	.	NA	NA	-1.69336	0.0696652
transcript-124_13687_75PE	Cytochrome c oxidase subunit 1;	.	NA	NA	-1.69149	0.0465001
transcript-124_8153_75PE|m.22310	Protein PRRC1-A;	Protein PRRC1-A;	NA	NA	-1.69136	0.0536889
Contig1070|m.11679	.	.	NA	NA	-1.69009	0.0105043
MinimusContig_3165	.	.	NA	NA	-1.69007	0.0507268
transcript-124_4478_75PE	.	.	NA	NA	-1.69004	0.00165563
transcript-124_1903_75PE|m.16157	Activated CDC42 kinase 1;	Activated CDC42 kinase 1;	NA	NA	-1.68203	0.0111851
Contig2684	.	.	NA	NA	-1.67846	0.00698533
transcript-124_43051_75PE|m.51685	.	.	NA	NA	-1.67684	0.00492012
transcript-124_50828_75PE	.	.	NA	NA	-1.67674	0.0294738
transcript-124_29209_75PE	.	.	NA	NA	-1.67611	0.0816288
transcript-124_37467_75PE	.	.	NA	NA	-1.67454	0.0952701
transcript-124_41086_75PE	.	.	NA	NA	-1.67438	0.0794282
transcript-124_32690_75PE	.	.	NA	NA	-1.67296	0.0921628
transcript-124_504_75PE	.	.	NA	NA	-1.67135	0.0462592
transcript-124_5760_75PE|m.20120	Leishmanolysin-like peptidase;	Leishmanolysin-like peptidase;	NA	NA	-1.66944	0.0355371
MinimusContig_312|m.669	Protein tyrosine phosphatase type IVA 1;	Protein tyrosine phosphatase type IVA 1;	NA	NA	-1.66758	0.0363583
R1_Contig7143|m.88984	DNA polymerase delta subunit 2;	DNA polymerase delta subunit 2;	NA	NA	-1.66555	0.0906013
transcript-124_2919_75PE|m.17195	UDP-glucose:glycoprotein glucosyltransferase 1;	UDP-glucose:glycoprotein glucosyltransferase 1;	NA	NA	-1.66538	0.0365872
transcript-124_690_75PE|m.14971	Unconventional myosin-XV;	Unconventional myosin-XV;	NA	NA	-1.66024	0.0339579
transcript-124_2516_75PE|m.16793	Coiled-coil domain-containing protein 18;	Coiled-coil domain-containing protein 18;	NA	NA	-1.65996	0.0757161
transcript-124_4444_75PE	.	.	NA	NA	-1.65947	0.00216567
R1_Contig3937	.	.	NA	NA	-1.65922	0.0757845
transcript-124_11489_75PE	.	.	NA	NA	-1.65817	0.0225351
transcript-124_20707_75PE|m.33792	.	.	NA	NA	-1.657	0.0884596
Myt_cherry_idba_rep_c3134	.	.	NA	NA	-1.65556	0.0808078
R1_Contig4115	.	.	NA	NA	-1.65263	0.0573502
R1_Contig4004	.	.	NA	NA	-1.64695	0.0460924
MinimusContig_1493|m.2517	Microtubule-associated protein futsch;	Microtubule-associated protein futsch;	NA	NA	-1.6439	0.0675861
Contig16_capround1|m.10386	EF-hand domain-containing family member B;	EF-hand domain-containing family member B;	NA	NA	-1.6407	0.064323
transcript-124_11424_75PE|m.25456	Proliferation marker protein Ki-67 {ECO:0000305};	Proliferation marker protein Ki-67 {ECO:0000305};	NA	NA	-1.62354	0.0863056
Myt_cherry_idba_rep_c5625|m.91076	Protein SDA1 homolog;	Protein SDA1 homolog;	NA	NA	-1.61798	0.0992832
transcript-124_630_75PE|m.14891	Netrin receptor UNC5C;	Netrin receptor UNC5C;	NA	NA	-1.6138	0.0654771
transcript-124_29671_75PE|m.41339	.	.	NA	NA	-1.61157	0.0310239
transcript-124_58588_75PE|m.62996	Ran-specific GTPase-activating protein;	Ran-specific GTPase-activating protein;	NA	NA	-1.60868	0.0858731
transcript-124_17274_75PE|m.30816	SUN domain-containing ossification factor;	SUN domain-containing ossification factor;	NA	NA	-1.60799	0.0139996
transcript-124_7723_75PE|m.21901	Kanadaptin;	Kanadaptin;	NA	NA	-1.60031	0.0308334
MinimusContig_2239|m.4496	Echinoderm microtubule-associated protein-like 6;	Echinoderm microtubule-associated protein-like 6;	NA	NA	-1.5992	0.0808078
transcript-124_14329_75PE	.	.	NA	NA	-1.59619	0.0767002
transcript-124_5629_75PE|m.19988	Serine/threonine-protein phosphatase 6 regulatory ankyrin repeat subunit A;	Serine/threonine-protein phosphatase 6 regulatory ankyrin repeat subunit A;	NA	NA	-1.59596	0.0544599
MinimusContig_4124	.	.	NA	NA	-1.59389	0.0734288
transcript-124_2196_75PE|m.16470	Protein white;	Protein white;	NA	NA	-1.58778	0.0623476
transcript-124_16276_75PE	.	.	NA	NA	-1.5853	0.0431234
MinimusContig_3465	.	.	NA	NA	-1.58196	0.00856434
transcript-124_1155_75PE|m.15460	.	.	NA	NA	-1.58181	0.061534
transcript-124_43716_75PE|m.52170	Flotillin-1;	Flotillin-1;	NA	NA	-1.58146	0.0502098
transcript-124_10826_75PE	.	.	NA	NA	-1.58091	0.0473914
transcript-124_20991_75PE|m.34003	FYVE, RhoGEF and PH domain-containing protein 4;	FYVE, RhoGEF and PH domain-containing protein 4;	NA	NA	-1.57345	0.00300848
R1_Contig6772	.	.	NA	NA	-1.57045	0.035331
transcript-124_10543_75PE|m.24569	.	.	NA	NA	-1.55834	0.0502543
MinimusContig_3538|m.7072	Transcription elongation factor SPT6;	Transcription elongation factor SPT6;	NA	NA	-1.55787	0.06587
MinimusContig_833	.	.	NA	NA	-1.55302	0.0270062
transcript-124_1841_75PE|m.16072	Probable E3 ubiquitin-protein ligase HECTD4;	Probable E3 ubiquitin-protein ligase HECTD4;	NA	NA	-1.54926	0.0147752
Myt_cherry_idba_rep_c5524|m.91044	60S ribosomal protein L32;	60S ribosomal protein L32;	NA	NA	-1.54785	0.0814695
Contig3252|m.13543	.	.	NA	NA	-1.54713	0.0784822
transcript-124_31982_75PE	.	.	NA	NA	-1.54408	0.0275249
transcript-124_7866_75PE|m.22031	.	.	NA	NA	-1.54053	0.00178438
transcript-124_12879_75PE|m.26881	Protein Wnt-2b;	Protein Wnt-2b;	NA	NA	-1.53938	0.0671289
Contig2726	.	.	NA	NA	-1.53859	0.0890987
MinimusContig_4102|m.8009	DnaJ homolog subfamily C member 8;	DnaJ homolog subfamily C member 8;	NA	NA	-1.53266	0.0863056
transcript-124_22936_75PE|m.35629	Outer dense fiber protein 3;	Outer dense fiber protein 3;	NA	NA	-1.52968	0.083552
MinimusContig_3720	.	.	NA	NA	-1.52839	0.0359345
transcript-124_33669_75PE	.	.	NA	NA	-1.5273	0.0877275
Myt_cherry_idba_rep_c16008	.	.	NA	NA	-1.51444	0.0411838
Myt_cherry_idba_rep_c4034|m.90544	Alpha- and gamma-adaptin-binding protein p34;	Alpha- and gamma-adaptin-binding protein p34;	NA	NA	-1.51432	0.0807653
MinimusContig_610	.	.	NA	NA	-1.51425	0.0264263
MinimusContig_138|m.294	Supervillin {ECO:0000303|PubMed:9867483};	Supervillin {ECO:0000303|PubMed:9867483};	NA	NA	-1.51044	0.0497599
MinimusContig_4078|m.7975	Serine/threonine-protein phosphatase 4 regulatory subunit 4;	Serine/threonine-protein phosphatase 4 regulatory subunit 4;	NA	NA	-1.50719	0.0612475
transcript-124_9595_75PE	.	.	NA	NA	-1.50233	0.0814695
transcript-124_15628_75PE|m.29383	.	.	NA	NA	-1.50155	0.074793
R1_Contig1736|m.86029	.	.	NA	NA	-1.50091	0.0648924
transcript-124_19110_75PE|m.32491	.	.	NA	NA	-1.49404	0.0125369
MinimusContig_812	.	.	NA	NA	-1.49273	0.0193747
R1_Contig6200	.	.	NA	NA	-1.48521	0.0257875
transcript-124_14271_75PE	.	.	NA	NA	-1.47552	0.0740242
transcript-124_7626_75PE	.	.	NA	NA	-1.47539	0.00986849
R1_Contig5842|m.88002	Leucine-rich repeat-containing protein 49;	Leucine-rich repeat-containing protein 49;	NA	NA	-1.47366	0.0770868
transcript-124_54934_75PE	.	.	NA	NA	-1.47208	0.0941331
R1_Contig3370	.	.	NA	NA	-1.47096	0.0249714
transcript-124_3827_75PE|m.18163	Toll-like receptor Tollo {ECO:0000305};	Toll-like receptor Tollo {ECO:0000305};	NA	NA	-1.4699	0.0925773
Myt_cherry_idba_rep_c6749	.	.	NA	NA	-1.46527	0.0721589
transcript-124_14297_75PE|m.28199	.	.	NA	NA	-1.46468	0.0019261
Myt_cherry_idba_rep_c1585	.	.	NA	NA	-1.45911	0.0358556
transcript-124_12192_75PE	.	.	NA	NA	-1.4585	0.089458
R1_Contig4003	.	.	NA	NA	-1.4552	0.0450636
transcript-124_12180_75PE|m.26220	ATP-dependent DNA helicase Q4;	ATP-dependent DNA helicase Q4;	NA	NA	-1.45265	0.0332506
MinimusContig_364|m.767	.	.	NA	NA	-1.45246	0.00888134
Contig2380|m.12768	FERM domain-containing protein 3;	FERM domain-containing protein 3;	NA	NA	-1.4521	0.0472826
Contig3272	.	.	NA	NA	-1.44639	0.0209317
Myt_cherry_idba_rep_c7773	.	.	NA	NA	-1.43878	0.0451103
Myt_cherry_idba_rep_c11812|m.92886	.	.	NA	NA	-1.43797	0.0884453
MinimusContig_667	.	.	NA	NA	-1.43748	0.0146575
transcript-124_6437_75PE|m.20679	Carboxylesterase 3;	Carboxylesterase 3;	NA	NA	-1.43576	0.0746733
Contig228|m.10678	NACHT and WD repeat domain-containing protein 2;	NACHT and WD repeat domain-containing protein 2;	NA	NA	-1.4298	0.0217141
transcript-124_27351_75PE	.	.	NA	NA	-1.4296	0.000843804
Contig3331|m.13604	CCR4-NOT transcription complex subunit 2;	CCR4-NOT transcription complex subunit 2;	NA	NA	-1.42844	0.0163027
transcript-124_5859_75PE	.	.	NA	NA	-1.41825	0.0321182
R1_Contig6644	.	.	NA	NA	-1.41212	0.0598886
transcript-124_88447_75PE|m.81763	.	.	NA	NA	-1.4111	0.0669454
MinimusContig_2309	.	.	NA	NA	-1.41061	0.0233833
transcript-124_1586_75PE|m.15846	Ras-specific guanine nucleotide-releasing factor RalGPS2;	Ras-specific guanine nucleotide-releasing factor RalGPS2;	NA	NA	-1.41003	0.0807233
R1_Contig57	.	.	NA	NA	-1.40793	0.0724669
transcript-124_21410_75PE|m.34320	.	.	NA	NA	-1.40727	0.0521374
transcript-124_38085_75PE	.	.	NA	NA	-1.39882	0.0967892
transcript-124_27363_75PE|m.39432	.	.	NA	NA	-1.3977	0.0714918
transcript-124_27363_75PE|m.39433	.	.	NA	NA	-1.3977	0.0714918
transcript-124_1323_75PE|m.15619	Leucine-rich repeat-containing protein 74A {ECO:0000250|UniProtKB:Q0VAA2};	Leucine-rich repeat-containing protein 74A {ECO:0000250|UniProtKB:Q0VAA2};	NA	NA	-1.3943	0.0287882
transcript-124_17178_75PE|m.30735	Plasminogen;	Plasminogen;	NA	NA	-1.38976	0.0961755
transcript-124_721_75PE|m.14994	Neurabin-1;	Neurabin-1;	NA	NA	-1.38478	0.0798342
R1_Contig3996	.	.	NA	NA	-1.38444	0.0896157
transcript-124_27341_75PE|m.39413	.	.	NA	NA	-1.38398	0.0823929
R1_Contig1537|m.85878	DDB1- and CUL4-associated factor 13;	DDB1- and CUL4-associated factor 13;	NA	NA	-1.38301	0.089986
MinimusContig_2626|m.5333	.	.	NA	NA	-1.3825	0.0913918
Contig2991|m.13333	Pregnancy zone protein;	Pregnancy zone protein;	NA	NA	-1.37715	0.0261915
Contig3446|m.13693	.	.	NA	NA	-1.37667	0.0677995
R1_Contig3650	.	.	NA	NA	-1.37254	0.014431
transcript-124_12230_75PE	.	.	NA	NA	-1.36982	0.0907997
MinimusContig_3169	.	.	NA	NA	-1.36455	0.0472559
transcript-124_2779_75PE|m.17090	DDB1- and CUL4-associated factor 8;	DDB1- and CUL4-associated factor 8;	NA	NA	-1.35842	0.0607274
R1_Contig338|m.85062	ATP-dependent RNA helicase DDX51;	ATP-dependent RNA helicase DDX51;	NA	NA	-1.3584	0.0726409
transcript-124_26372_75PE	.	.	NA	NA	-1.35596	0.0505096
Myt_cherry_idba_rep_c4766|m.90785	Alpha-1,2-mannosyltransferase ALG9 {ECO:0000305};	Alpha-1,2-mannosyltransferase ALG9 {ECO:0000305};	NA	NA	-1.3552	0.0896157
transcript-124_44568_75PE|m.52795	.	.	NA	NA	-1.34751	0.065354
MinimusContig_1799|m.3552	.	.	NA	NA	-1.34406	0.0310239
transcript-124_3754_75PE	.	.	NA	NA	-1.33883	0.0528928
transcript-124_19795_75PE	.	.	NA	NA	-1.33842	0.0977506
MinimusContig_4340	.	.	NA	NA	-1.33749	0.0405366
MinimusContig_1970|m.3908	Serine protease inhibitor dipetalogastin;	.	NA	NA	-1.32848	0.0686213
Myt_cherry_idba_rep_c7120|m.91556	Glycosylated lysosomal membrane protein {ECO:0000250|UniProtKB:Q8WWB7};	Glycosylated lysosomal membrane protein {ECO:0000250|UniProtKB:Q8WWB7};	NA	NA	-1.31641	0.0776083
transcript-124_4946_75PE|m.19320	.	.	NA	NA	-1.30993	0.0699694
R1_Contig3317	.	.	NA	NA	-1.30467	0.0676529
transcript-124_36655_75PE	.	.	NA	NA	-1.30029	0.0965135
transcript-124_10442_75PE|m.24443	.	.	NA	NA	-1.2968	0.0740242
transcript-124_4768_75PE|m.19160	Nose resistant to fluoxetine protein 6;	Nose resistant to fluoxetine protein 6;	NA	NA	-1.29679	0.0275546
MinimusContig_4262	.	.	NA	NA	-1.29419	0.0863056
transcript-124_34150_75PE|m.44865	Intestine-specific homeobox;	Intestine-specific homeobox;	NA	NA	-1.29407	0.0510807
transcript-124_162_75PE|m.14323	Cytoplasmic dynein 1 heavy chain 1;	Cytoplasmic dynein 1 heavy chain 1;	NA	NA	-1.28597	0.0841048
MinimusContig_629|m.1285	Myosin-VIIa;	Myosin-VIIa;	NA	NA	-1.26062	0.0808078
transcript-124_30070_75PE|m.41637	.	.	NA	NA	-1.25629	0.0863056
Myt_cherry_idba_rep_c5896	.	.	NA	NA	-1.25016	0.045811
transcript-124_38059_75PE	.	.	NA	NA	-1.24954	0.0878184
MinimusContig_2228|m.4480	Cilia- and flagella-associated protein 65 {ECO:0000305};	Cilia- and flagella-associated protein 65 {ECO:0000305};	NA	NA	-1.24742	0.0863056
Contig2779|m.13137	Splicing factor 3A subunit 1;	Splicing factor 3A subunit 1;	NA	NA	-1.24514	0.0801604
transcript-124_9330_75PE|m.23417	Lysosomal acid lipase/cholesteryl ester hydrolase;	Lysosomal acid lipase/cholesteryl ester hydrolase;	NA	NA	-1.24352	0.0886923
MinimusContig_3798	.	.	NA	NA	-1.2399	0.0235467
MinimusContig_1344|m.1925	E3 ubiquitin-protein ligase UBR5;	E3 ubiquitin-protein ligase UBR5;	NA	NA	-1.23747	0.0326414
R1_Contig3707	.	.	NA	NA	-1.23277	0.0822196
R1_Contig6966|m.88861	.	.	NA	NA	-1.22687	0.0948162
transcript-124_7106_75PE	.	.	NA	NA	-1.22627	0.0405366
MinimusContig_1910	.	.	NA	NA	-1.22176	0.0128551
Contig2782|m.13140	Speckle targeted PIP5K1A-regulated poly(A) polymerase;	Speckle targeted PIP5K1A-regulated poly(A) polymerase;	NA	NA	-1.22148	0.0780518
transcript-124_31043_75PE	.	.	NA	NA	-1.20867	0.0859535
transcript-124_2725_75PE|m.17038	Protein strawberry notch homolog 1;	Protein strawberry notch homolog 1;	NA	NA	-1.20619	0.0736074
transcript-124_10910_75PE|m.24941	Pre-B-cell leukemia transcription factor 4;	Pre-B-cell leukemia transcription factor 4;	NA	NA	-1.20019	0.0521374
R1_Contig7149	.	.	NA	NA	1.20058	0.0906013
R2_Contig465	.	.	NA	NA	1.20126	0.0883554
transcript-124_3174_75PE|m.17488	ATPase family AAA domain-containing protein 2;	ATPase family AAA domain-containing protein 2;	NA	NA	1.20561	0.0880078
MinimusContig_4774|m.8929	Mitochondrial import inner membrane translocase subunit TIM44;	Mitochondrial import inner membrane translocase subunit TIM44;	NA	NA	1.20903	0.0159552
R1_Contig5351|m.87792	von Willebrand factor D and EGF domain-containing protein;	von Willebrand factor D and EGF domain-containing protein;	NA	NA	1.21046	0.0979679
Myt_cherry_idba_rep_c9523|m.92275	Splicing factor 3B subunit 3;	Splicing factor 3B subunit 3;	NA	NA	1.21079	0.082326
transcript-124_33014_75PE	.	.	NA	NA	1.21195	0.0991408
MinimusContig_1491|m.2516	Acidic mammalian chitinase;	Acidic mammalian chitinase;	NA	NA	1.22004	0.0705883
MinimusContig_2288	.	.	NA	NA	1.22376	0.0512991
transcript-124_16654_75PE	.	.	NA	NA	1.23269	0.0433558
transcript-124_19344_75PE	.	.	NA	NA	1.23321	0.0539305
MinimusContig_3141	.	.	NA	NA	1.23754	0.00626462
R1_Contig7255	.	.	NA	NA	1.24062	0.0819665
R1_Contig4672	.	.	NA	NA	1.24707	0.0460924
transcript-124_30929_75PE	Mitochondrial import inner membrane translocase subunit Tim10;	.	NA	NA	1.24726	0.099574
Contig2618|m.12977	Protein FAM227B;	Protein FAM227A;	NA	NA	1.24863	0.0740242
transcript-124_19721_75PE	.	.	NA	NA	1.25432	0.0871908
R1_Contig3010	.	.	NA	NA	1.25446	0.0406948
MinimusContig_3606	.	.	NA	NA	1.25954	0.0688469
MinimusContig_5462	.	.	NA	NA	1.26065	0.0880078
Contig96|m.10534	.	.	NA	NA	1.26128	0.0695371
Myt_cherry_idba_rep_c3034|m.90286	Glutamine--tRNA ligase;	Glutamine--tRNA ligase;	NA	NA	1.26196	0.011326
transcript-124_19074_75PE	.	.	NA	NA	1.26232	0.0577838
MinimusContig_2440|m.4932	Probable G-protein coupled receptor 158;	Probable G-protein coupled receptor 158;	NA	NA	1.2665	0.0657416
Myt_cherry_idba_rep_c1315	Perlucin-like protein {ECO:0000303|PubMed:21643827};	.	NA	NA	1.26715	0.0884596
MinimusContig_2167	.	.	NA	NA	1.26772	0.0173241
MinimusContig_4155|m.8091	.	.	NA	NA	1.2699	0.0504065
Myt_cherry_idba_rep_c10466|m.92564	A disintegrin and metalloproteinase with thrombospondin motifs 16;	A disintegrin and metalloproteinase with thrombospondin motifs 16;	NA	NA	1.27257	0.0863056
transcript-124_23941_75PE	.	.	NA	NA	1.27552	0.0697182
[truncated: 794 more rows]
